# Supplementary material
Source: PubMed Central journal article supplement (PMC6583032)
Supplement: jamapsychiatry-75-1261-s002.pdf [file jamapsychiatry-75-1261-s002.pdf]

## Supplementary Online Content

Wang Q, Wu HM, Yue W, et al; the Chinese Antipsychotics Pharmacogenomics Consortium. Effect of damaging rare mutations in synapse-related gene sets on response to short-term antipsychotic medication in Chinese patients with schizophrenia: a randomized clinical trial. *JAMA Psychiatry*. Published online November 7, 2018. doi:10.1001/jamapsychiatry.2018.3039

**eMethods.** Materials and Methods

**eFigure 1.** The first two principal components of worst-responders (n=160) and best-responders (n=156) from PCA analysis result

**eFigure 2.** Quantile-quantile plot of genome-wide P values of single-variant (SNPs with MAF > 0.05) associations

**eTable 1.** Use of antipsychotics in the present study

**eTable 2.** List of 175 pharmacogenetics associated genes selected as candidates

**eTable 3.** Single variant based association results of the top 100 SNPs

**eTable 4.** The gene-based association results of rare variants using VT test, one-sided burden test and SKAT-O, top 100 genes are shown for each test

**eTable 5.** Nominally significant rare variant association (gene-based) results on candidate genes

**eTable 6.** Set-based association result of rare (MAF < 1%) damaging non-synonymous variant in the 79 candidate gene sets

**eTable 7.** Information about variants identified in the reduced NMDA-mediated synaptic current in the discovery exome study

**eTable 8.** Information about variants identified in the reduced AMPA-mediated synaptic current in the discovery exome study

**eTable 9.** Information about variants identified in the abnormal AMPA-mediated synaptic current in the discovery exome study

**eTable 10.** Set-based association results on candidate gene-sets in the discovery exome on rare (MAF<0.01) synonymous variants

**eTable 11.** Full list of genes selected for targeted sequencing

**eTable 12.** The gene-based association results of rare variants (damaging non-synonymous with MAF < 1%) using CMC burden test in follow-up study

**eTable 13.** Information about variants identified in the reduced NMDA-mediated synaptic current in the follow-up study

**eTable 14.** Set-based association results on the 3 candidate gene-sets in the follow-up study on rare (MAF<0.01) synonymous variants in CMC burden test

**eTable 15.** Burden of rare allele (damaging nonsyn with MAF < 0.01) in follow-up by median splitting, with subjects with lower PANSS were treated as "less responsive"

This supplementary material has been provided by the authors to give readers additional information about their work.

#### **eMethods. Materials and Methods**

##### Demographic and Clinical Characteristics of Participants

Participants were recruited from multi-center, randomized and open-labelled clinical trial. Briefly, all participants were taken into account to be included in the study if they met the following criteria: 1) aged from 18 to 45 years old; 2) Han Chinese descent; 3) fulfilled the DSM-IV diagnosis criteria for schizophrenia; 4) physically healthy with all laboratory tests (for example, measurement of blood pressure, ECG, liver and renal function within normal range); 5) total scores of PANSS more than 60, and at least three positive items scored more than 4. Patients with schizophrenia were excluded if 1) they were diagnosed with mental retardation or other cognitive disorders; 2) had a history of serious adverse reactions to the proposed treatments; 3) had a history of treatment resistance defined by the persistence of severe symptoms despite adequate trials of one of the proposed treatments or prior treatment with clozapine; 4) were pregnant or breast-feeding; 5) or had a serious and unstable medical condition. According to the study protocol, the first 2 weeks of treatment were spent on titration of drugs and the later 4 weeks were the maintenance period. Subjects were excluded if they experienced severe adverse effects anytime during these 6 weeks period. About 300 patients failed to complete 6 weeks' treatment due to severe side effects or significant worsening of symptoms. After quality controls, the study cohort consists of 3,023 subjects.

##### Whole Exome Sequencing (WES)

After matching for age, sex and antipsychotic treatment, a total of 337 subjects were selected for whole exome sequencing. Genomic DNA was purified from peripheral blood leucocytes. DNA

samples were prepared according to the Illumina Paired-End Sample Preparation Guide ([http://supportres.illumina.com/documents/myillumina/e5af4eb5-6742-40c8-bcb1-d8b350bcb964/paired-end\\_sampleprep\\_guide\\_1005063\\_e.pdf](http://supportres.illumina.com/documents/myillumina/e5af4eb5-6742-40c8-bcb1-d8b350bcb964/paired-end_sampleprep_guide_1005063_e.pdf)). Targeted enrichment was performed with Agilent's SureSelect Human All Exon v.4 (Santa Clara, California, USA). Exon-enriched DNA libraries were sequenced on an Illumina HiSeq2000 at Axseq Technologies (<http://www.axeq.com/>), which produced 101bp paired-end reads. We used the standard pipeline that made use of the following tools: Burrow-Wheeler Alignment (BWA) <sup>3</sup> for aligning sequence reads to human genome reference sequence (UCSC hg19 as reference); Samtools <sup>4</sup> for sorting and indexing the aligned files; Picard (<http://picard.sourceforge.net/>) for sequence duplicate identification and removal; Genome Analysis Toolkit (GATK) <sup>5</sup> v2.7 for local realignment around small insertions and deletions, recalibration of base quality and variant calling by Unified Genotyper. KGGSeq (Li et al., 2013) was used to annotate variants (using RefGene hg19 as reference). It also predicted potentially deleterious non-synonymous variants using a logit model combining prediction scores from multiple functional prediction algorithms (such as SIFT, PolyPhen2, LRT, MutationTaster, MutationAssessor and FATHMM) as well as various conservation scores (PhyloP, GERP and SiPhy). KGGSeq yielded two flags on deleterious prediction: disease-causative and nondisease-causative. Variants that are predicted to be disease-causative by KGGSeq are referred to "damaging".

Genotyping was also performed in all 337 samples by using Infinium OmniZhongHua-8, which is Chinese-specific whole genome array from Illumina. It provides coverage of 77% of common variation (minor allele frequency (MAF) > 5%), 73% of intermediate variation (MAF > 2.5%), and 65% of rare variation (MAF > 1%) in the Chinese population at  $r^2 \geq 0.8$ . The SNP content are

optimized from all 3 HapMap phases and the 1kG. In addition, OmniZhongHua-8 allows profiling of > 875,000 markers per sample, delivering exceptionally high data quality for call rates (average > 99%), reproducibility (> 99.9%), and low sample repeat rates. The concordance rates of the sequence and GWAS genotypes were checked for evaluating the accuracy of variant calling. The concordance rate is over 99% for all samples.

#### Quality Control (QC) for WES

##### QC at the Read level:

Raw sequencing reads (FASTQ files) were subject to quality control by the FASTQC tool (<http://www.bioinformatics.babraham.ac.uk/projects/fastqc/>). Each base sequence quality, sequence duplication levels, GC bias and primer sequencing reads were evaluated.

##### QC at the genotype/variant level:

A series of filterings was applied to generate high-quality variants for subsequent analyses. Firstly, the GATK Variant Quality Score Recalibration (VQSR) approach was used to filter variants across all samples, variants with VQSLOD score (assigned by VQSR)  $\leq 99.0$  were removed. We excluded genotypes with genotyping quality score  $< 20$ , read depth  $< 8X$  or second most possible genotype with Phred  $< 30$ . Finally, variants with missing data in  $> 10\%$  of samples, failing Hardy-Weinberg Equilibrium test ( $P < 0.00001$ ) or becoming monomorphic due to removal of genotype by QC were removed from the downstream analysis.

##### QC at sample level:

We removed contaminated samples detected by VerifyBamID<sup>6</sup>. PLINK<sup>7</sup> was used to identify related individuals by evaluating their identity-by-state (IBD), pairs showing relatedness closer than first-cousin ( $IBD > 0.125$ ) were identified. For each pair of related individuals, we discarded

the individual with lower genotype call rate. Samples with mismatched gender information were removed from the analysis. To ensure a homogenous study population, EIGENSOFT<sup>8</sup> was used to detect population stratification based on the principal component analysis of common variants (MAF > 5%).

#### Common variant association testing

A single variant test for association with treatment response was performed by logistic regression with age, sex, antipsychotic types and the first two principal components as covariates. We excluded variants with MAF < 5% and genotyping rate < 95%. The analyses were repeated for non-synonymous variants and damaging non-synonymous variants. Nominal p-value <  $5 \times 10^{-8}$  was used as the genome-wide significance threshold. Analyses were conducted in PLINK<sup>7</sup>.

#### Targeted Sequencing

In the follow-up study, a total of 78 genes were sequenced in 1,999 subjects of the remaining cohort using targeted sequencing (Table S12). It consists of 34 genes involved in the top three gene sets (*reduced NMDA-mediated synaptic currents*, *reduced AMPA-mediated synaptic currents* and *Abnormal AMPA-mediated synaptic currents*), 3 candidate genes (*GRIN*, *GRM7* and *ZNF804A*) and additional 41 genes selected by investigator's interest based on the literature and other schizophrenia/pharmacogenetic candidates.

A two-step PCR reaction were used to construct the sequence library. Firstly, the target region sequences (i.e. the exons plus 2 bp of flanking regions) were conducted in a 15 µL reaction volume, consisting of 100 ng of genomic DNA template, 10ul primer pool mix, 5ul clean water and 2 X M\_Enzyme MIX. PCRs were conducted as follows: 95°C for 3 min, 17 cycles of 98°C for 15sec and 60 °C for 4 min, followed by 10°C for 10 min. Next, the PCR products were

purificated by (0.4+0.6) X AMPure XP Beads. After that, the amplification was done using PCRs as following settings: 95°C for 30 sec, 6 cycles of 98°C for 15 sec, 55 °C for 20 sec and 72 °C for 30s, followed by 72°C for 5 mi. Finally, the target library was obtained by 0.7 X AMPure XP Beads purification. The library was built using Hiseq3000/4000 PE Cluster Kit and HiSeq 3000/4000SBS Kit following the standard protocols of Illumina system. The DNA libraries were sequenced on Illumina HiSeq4000.

We used the standard pipeline that made use of the following tools: Burrow-Wheeler Alignment (BWA)<sup>3</sup> for aligning sequence reads to human genome reference sequence (UCSC hg19 as reference); Samtools<sup>4</sup> for sorting and indexing the aligned files; Picard (<http://picard.sourceforge.net/>) for sequence duplicate identification and removal; Genome Analysis Toolkit (GATK)<sup>5</sup> v3.5 for local realignment around small insertions and deletions, recalibration of base quality and variant calling by HaplotypeCaller. KGGSeq (Li et al., 2013) was used to annotate variants (using RefGene hg19 as reference) and predict deleteriousness of non-synonymous variants. We excluded genotypes with genotyping quality score < 20, read depth < 60X or second most possible genotype with Phred < 30. Finally, variants with missing data in > 10% of samples, failing Hardy-Weinberg Equilibrium test ( $P < 0.00001$ ) or becoming monomorphic due to removal of genotype by QC were removed from the downstream analysis.

70 of 78 genes were successfully sequenced. After performing quality controls, 23 individuals with < 90% genotype rate and 34 subjects with high IBD/IBS ( $\phi\text{-hat} > 0.9$ ) were removed; 22 subjects were regarded as outliers and removed from the analysis (outlier defined as 3 SD outside the mean total PANSS reduction rate). The final dataset contains 5,009 SNVs of 1,920 subjects.

Statistical analyses of gene-based and set-based tests were performed using RVTEST. Response (i.e. total PANSS reduction rate) was treated as quantitative trait in the CMC burden test, with sex, age, and antipsychotic type [typical/atypical] as covariates.

## REFERENCES

1. Wechsler D. Wechsler memory scale. 1945.
2. Cattell RB, Cattell A. *Measuring intelligence with the culture fair tests*. Institute for Personality and Ability Testing; 1960.
3. Li H, Durbin R. Fast and accurate long-read alignment with Burrows-Wheeler transform. *Bioinformatics*. 2010;26(5):589-595.
4. Li H, Handsaker B, Wysoker A, et al. The Sequence Alignment/Map format and SAMtools. *Bioinformatics*. 2009;25(16):2078-2079.
5. DePristo MA, Banks E, Poplin R, et al. A framework for variation discovery and genotyping using next-generation DNA sequencing data. *Nat Genet*. 2011;43(5):491-498.
6. Jun G, Flickinger M, Hetrick KN, et al. Detecting and estimating contamination of human DNA samples in sequencing and array-based genotype data. *Am J Hum Genet*. 2012;91(5):839-848.
7. Purcell S, Neale B, Todd-Brown K, et al. PLINK: a tool set for whole-genome association and population-based linkage analyses. *American journal of human genetics*. 2007;81(3):559-575.
8. Price AL, Patterson NJ, Plenge RM, Weinblatt ME, Shadick NA, Reich D. Principal components analysis corrects for stratification in genome-wide association studies. *Nat Genet*. 2006;38(8):904-909.
9. McClay JL, Adkins DE, Aberg K, et al. Genome-wide pharmacogenomic analysis of response to treatment with antipsychotics. *Mol Psychiatry*. 2011;16(1):76-85.
10. Johnson AD, Handsaker RE, Pulit SL, Nizzari MM, O'Donnell CJ, de Bakker PI. SNAP: a web-based tool for identification and annotation of proxy SNPs using HapMap. *Bioinformatics*. 2008;24(24):2938-2939.



11. Chen CH, Shaikenov T, Peterson TR, et al. ER stress inhibits mTORC2 and Akt signaling through GSK-3beta-mediated phosphorylation of rictor. *Sci Signal*. 2011;4(161):ra10.
12. Zheng W, Wang H, Zeng Z, et al. The possible role of the Akt signaling pathway in schizophrenia. *Brain Res*. 2012;1470:145-158.
13. Siuta MA, Robertson SD, Kocalis H, et al. Dysregulation of the norepinephrine transporter sustains cortical hypodopaminergia and schizophrenia-like behaviors in neuronal rictor null mice. *PLoS Biol*. 2010;8(6):e1000393.
14. Collingridge G. Synaptic plasticity. The role of NMDA receptors in learning and memory. *Nature*. 1987;330(6149):604-605.
15. Changasi AH, Shams TA, Pouget JG, Müller DJ. Genetics of antipsychotic drug outcome and implications for the clinician: into the limelight. *2014*. 2014.
16. Law V, Knox C, Djoumbou Y, et al. DrugBank 4.0: shedding new light on drug metabolism. *Nucleic Acids Res*. 2014;42(Database issue):D1091-1097.

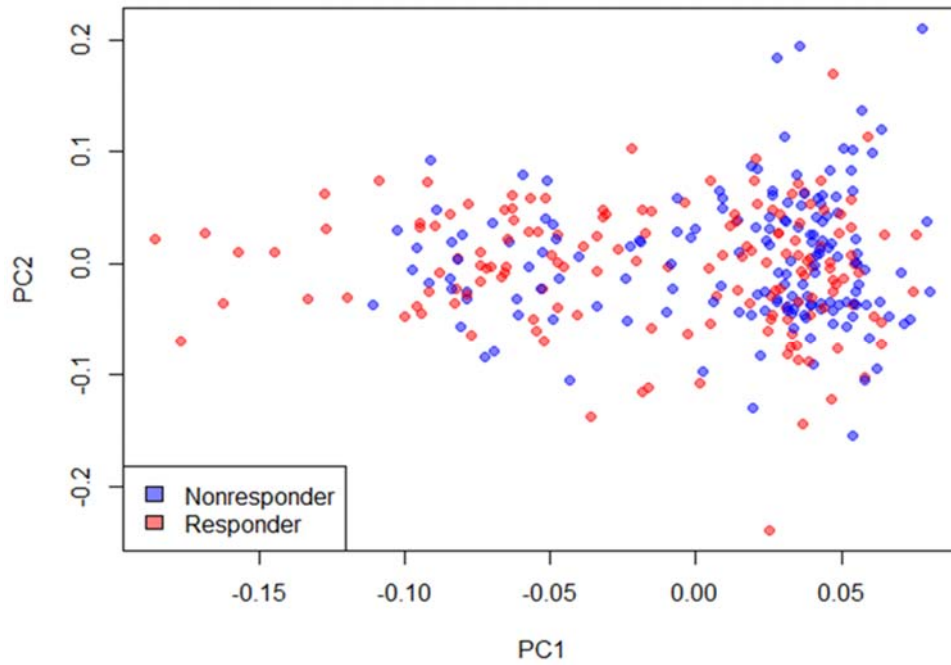

eFigure 1 The first two principal components of worst-responders (n=160) and best-responders (n=156) from PCA analysis result.

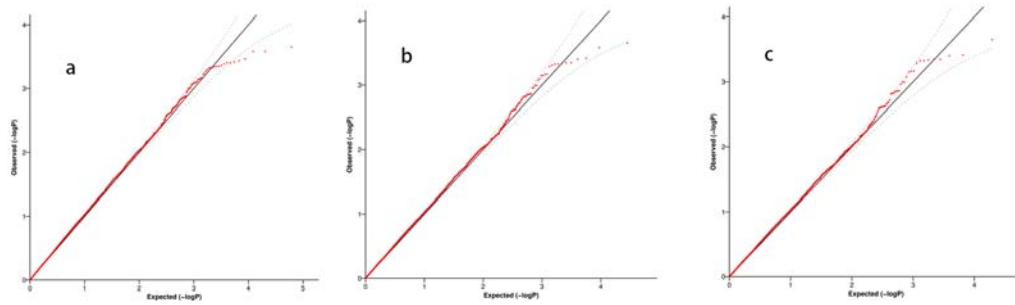

Figure 2 Quantile-Quantile plot of genome-wide P values of single-variant (SNPs with MAF > 0.05) associations Note: We assessed association using logistic regression analysis with adjustment for age, sex, antipsychotic class, and the first two principal components. We display separate Q-Q plot for a) all exonic variants, b) non-synonymous variants, and c) damaging non-synonymous variants. 95% confidence intervals for the null hypothesis of no association are shown in dotted grey line. Genomic control lambda values are: All exonic variants  $\lambda_{GC} = 1.03$ ; Non-synonymous variants only  $\lambda_{GC} = 1.03$ ; Damaging non-synonymous variants only  $\lambda_{GC} = 1.04$ . a, All exonic variants; b, Non-synonymous variants only; c, Damaging-synonymous variants only.

**eTable 1. Use of antipsychotics in the present study**

|             | Drugs        | N. of Individuals | Gender F:M | Age (years) | First-onset Ratio | Educational attainment (Months) |
|-------------|--------------|-------------------|------------|-------------|-------------------|---------------------------------|
|             | Risperidone  | 514               | 291:223    | 30.29(10.6) | 30.35%            | 9.83(3.21)                      |
|             | Olanzapine   | 509               | 259:250    | 30.66(7.99) | 29.08%            | 10.70(3.31)                     |
|             | Quetiapine   | 496               | 247:249    | 31.10(7.81) | 28.02%            | 10.27(3.26)                     |
|             | Aripiprazole | 502               | 247:255    | 31.40(7.89) | 27.69%            | 10.47(3.20)                     |
|             | Ziprasidone  | 506               | 253:253    | 30.69(8.08) | 29.64%            | 10.44(3.53)                     |
|             | Haloperidol  | 242               | 127:115    | 32.31(7.96) | 30.58%            | 10.13(3.20)                     |
|             | Perphenazine | 254               | 125:129    | 31.82(8.03) | 27.17%            | 9.89(2.93)                      |
|             | Total        | 3023              | 1549:1474  | 31.20(7.96) | 28.94%            | 10.41(3.29)                     |
| F/ $\chi^2$ |              |                   | 8.093      | 1.87        | 1.9126            | 1.40                            |
| p           |              |                   | 0.231      | 0.0816      | 0.928             | 0.158                           |

**eTable 2. List of 175 pharmacogenetics associated genes selected as candidates**

|                                |                |                |                |               |               |               |                |               |
|--------------------------------|----------------|----------------|----------------|---------------|---------------|---------------|----------------|---------------|
| Candidate reviewed by Changasi |                |                |                |               |               |               |                |               |
| <i>CYP2D6</i>                  | <i>CYP2C19</i> | <i>CYP1A2</i>  | <i>CYP2C9</i>  | <i>CYP3A4</i> | <i>CYP3A5</i> | <i>DRD2</i>   | <i>DRD3</i>    | <i>DRD4</i>   |
| <i>DRD1</i>                    | <i>HTR2A</i>   | <i>HTR7</i>    | <i>ZNF804A</i> | <i>BDNF</i>   | <i>ABCB1</i>  | <i>NRXN1</i>  | <i>HOMER-1</i> |               |
| DrugBank candidate             |                |                |                |               |               |               |                |               |
| <i>GABRP</i>                   | <i>GABRD</i>   | <i>ADRB2</i>   | <i>CHRM2</i>   | <i>CHRM4</i>  | <i>ADRB1</i>  | <i>HTR1A</i>  | <i>CHRM5</i>   | <i>ADRA2A</i> |
| <i>CHRM1</i>                   | <i>ADRB3</i>   | <i>DRD2</i>    | <i>GABRA1</i>  | <i>GABRB1</i> | <i>GABRG2</i> | <i>ADRA2C</i> | <i>CHRM3</i>   | <i>DRD1</i>   |
| <i>DRD4</i>                    | <i>DRD5</i>    | <i>HRH2</i>    | <i>ADRA1D</i>  | <i>HTR1D</i>  | <i>HTR1B</i>  | <i>HTR2A</i>  | <i>HTR2C</i>   | <i>GABRB3</i> |
| <i>HTR1E</i>                   | <i>GABRA5</i>  | <i>GABRA3</i>  | <i>HTR7</i>    | <i>ADRA1A</i> | <i>HRH1</i>   | <i>ADRA1B</i> | <i>DRD3</i>    | <i>HTR2B</i>  |
| <i>HTR3A</i>                   | <i>GABRA2</i>  | <i>GABRB2</i>  | <i>HTR5A</i>   | <i>GABRA4</i> | <i>HTR6</i>   | <i>CALM1</i>  | <i>GABRE</i>   | <i>GRIN2B</i> |
| <i>GABRA6</i>                  | <i>GABRG1</i>  | <i>GABRG3</i>  | <i>HRH4</i>    | <i>GABRQ</i>  | <i>ADRA2B</i> | <i>ABCB1</i>  | <i>UGT1A9</i>  | <i>CYP1A1</i> |
| <i>CYP1A2</i>                  | <i>CYP3A4</i>  | <i>CYP2C8</i>  | <i>CYP2D6</i>  | <i>CYP2C9</i> | <i>CBR1</i>   | <i>CYP2B6</i> | <i>CYP3A5</i>  | <i>CYP3A7</i> |
| <i>FMO3</i>                    | <i>CYP2C18</i> | <i>CYP2C19</i> |                |               |               |               |                |               |
| Cholinergic Receptor Genes     |                |                |                |               |               |               |                |               |
| <i>CHRNA1</i>                  | <i>CHRNA10</i> | <i>CHRNA2</i>  | <i>CHRNA3</i>  | <i>CHRNA4</i> | <i>CHRNA5</i> | <i>CHRNA6</i> | <i>CHRNA7</i>  | <i>CHRNA9</i> |
| <i>CHRNB1</i>                  | <i>CHRNB2</i>  | <i>CHRNB3</i>  | <i>CHRNB4</i>  | <i>CHRND</i>  | <i>CHRNE</i>  | <i>CHRNG</i>  |                |               |
| Dopamine Receptor Genes        |                |                |                |               |               |               |                |               |
| <i>DRD1</i>                    | <i>DRD2</i>    | <i>DRD3</i>    | <i>DRD4</i>    | <i>DRD5</i>   |               |               |                |               |
| GABA Receptor Genes            |                |                |                |               |               |               |                |               |
| <i>GABBR1</i>                  | <i>GABBR2</i>  | <i>GABRA1</i>  | <i>GABRA2</i>  | <i>GABRA3</i> | <i>GABRA4</i> | <i>GABRA5</i> | <i>GABRA6</i>  | <i>GABRB1</i> |
| <i>GABRB2</i>                  | <i>GABRB3</i>  | <i>GABRD</i>   | <i>GABRE</i>   | <i>GABRG1</i> | <i>GABRG2</i> | <i>GABRG3</i> | <i>GABRP</i>   | <i>GABRQ</i>  |
| <i>GABRR1</i>                  | <i>GABRR2</i>  |                |                |               |               |               |                |               |
| Glycine Receptor Genes         |                |                |                |               |               |               |                |               |
| <i>GCOM1</i>                   | <i>GLRA1</i>   | <i>GLRA2</i>   | <i>GLRA3</i>   | <i>GLRB</i>   | <i>GRIA1</i>  | <i>GRIA2</i>  | <i>GRIA3</i>   | <i>GRIA4</i>  |

**eTable 2 (continued). List of 175 pharmacogenetics associated genes selected as candidate**

|                                       |                |                |                |                |                |                |                |                |
|---------------------------------------|----------------|----------------|----------------|----------------|----------------|----------------|----------------|----------------|
| Ionotropic Glutamate Receptor Genes   |                |                |                |                |                |                |                |                |
| <i>GRID1</i>                          | <i>GRID2</i>   | <i>GRIK1</i>   | <i>GRIK2</i>   | <i>GRIK3</i>   | <i>GRIK4</i>   | <i>GRIK5</i>   | <i>GRIN1</i>   | <i>GRIN2A</i>  |
| <i>GRIN2B</i>                         | <i>GRIN2C</i>  | <i>GRIN2D</i>  | <i>GRIN3A</i>  | <i>GRINA</i>   |                |                |                |                |
| Metabotropic Glutamate Receptor Genes |                |                |                |                |                |                |                |                |
| <i>GRM1</i>                           | <i>GRM2</i>    | <i>GRM3</i>    | <i>GRM4</i>    | <i>GRM5</i>    | <i>GRM6</i>    | <i>GRM7</i>    | <i>GRM8</i>    |                |
| Serotonin Receptor Genes              |                |                |                |                |                |                |                |                |
| <i>HTR1A</i>                          | <i>HTR1B</i>   | <i>HTR1D</i>   | <i>HTR1E</i>   | <i>HTR1F</i>   | <i>HTR2A</i>   | <i>HTR2C</i>   | <i>HTR3A</i>   | <i>HTR3B</i>   |
| <i>HTR3C</i>                          | <i>HTR3D</i>   | <i>HTR3E</i>   | <i>HTR4</i>    | <i>HTR5A</i>   | <i>HTR6</i>    | <i>HTR7</i>    |                |                |
| Ryanodine Receptor Genes              |                |                |                |                |                |                |                |                |
| <i>RYR1</i>                           | <i>RYR2</i>    | <i>RYR3</i>    |                |                |                |                |                |                |
| CYP450 gene                           |                |                |                |                |                |                |                |                |
| <i>CYP1A1</i>                         | <i>CYP1A2</i>  | <i>CYP1B1</i>  | <i>CYP2A6</i>  | <i>CYP2A7</i>  | <i>CYP2A13</i> | <i>CYP2B6</i>  | <i>CYP2C8</i>  | <i>CYP2C9</i>  |
| <i>CYP2C18</i>                        | <i>CYP2C19</i> | <i>CYP2D6</i>  | <i>CYP2E1</i>  | <i>CYP2F1</i>  | <i>CYP2J2</i>  | <i>CYP2R1</i>  | <i>CYP2S1</i>  | <i>CYP2U1</i>  |
| <i>CYP2W1</i>                         | <i>CYP3A4</i>  | <i>CYP3A5</i>  | <i>CYP3A7</i>  | <i>CYP3A43</i> | <i>CYP4A11</i> | <i>CYP4A22</i> | <i>CYP4B1</i>  | <i>CYP4F2</i>  |
| <i>CYP4F3</i>                         | <i>CYP4F8</i>  | <i>CYP4F11</i> | <i>CYP4F12</i> | <i>CYP4F22</i> | <i>CYP4V2</i>  | <i>CYP4X1</i>  | <i>CYP4Z1</i>  | <i>CYP5A1</i>  |
| <i>CYP7A1</i>                         | <i>CYP7B1</i>  | <i>CYP8A1</i>  | <i>CYP8B1</i>  | <i>CYP11A1</i> | <i>CYP11B1</i> | <i>CYP11B2</i> | <i>CYP17A1</i> | <i>CYP19A1</i> |
| <i>CYP20A1</i>                        | <i>CYP21A2</i> | <i>CYP24A1</i> | <i>CYP26A1</i> | <i>CYP26B1</i> | <i>CYP26C1</i> | <i>CYP27A1</i> | <i>CYP27B1</i> | <i>CYP27C1</i> |

Note: Data source includes a recent review paper on genetic of antipsychotic drug outcome by Changasi<sup>15</sup> (Abbreviation: candidate reviewed by Changasi) (n = 17), Drugbank information on drug targets/enzymes/transporters/carriers<sup>16</sup> (Abbreviation: DrugBank candidate) (n = 66), pharmacodynamics genes that encode for cholinergic receptor (Abbreviation: Cholinergic Receptor Genes) (n = 16), dopamine receptor (Abbreviation: dopamine Receptor Genes) (n = 5), GABA receptor (Abbreviation: GABA Receptor Genes) (n = 20), glycine receptor (Abbreviation: Glycine Genes) (n = 9), ionotropic (Abbreviation: Ionotropic Glutamate Receptor Genes) (n = 14) and metabotropic (Abbreviation: Metabotropic Glutamate Receptor Genes) (n = 8) glutamate receptor, ryanodine receptor (Abbreviation: Ryanodine Receptor Genes) (n = 3) and serotonin receptor (Abbreviation: Serotonin Receptor Genes) (n = 16) and pharmacokinetic genes that encode for cytochrome P450 enzymes (Abbreviation: CYP450 gene) (n = 57).

**eTable 3. Single variant based association results of the top 100 SNPs**

| CHR | SNP         | BP (hg19) | A1 | TEST | NMISS | OR     | SE     | L95    | U95    | STAT   | P        |
|-----|-------------|-----------|----|------|-------|--------|--------|--------|--------|--------|----------|
| 14  | rs13749     | 102514227 | C  | ADD  | 316   | 0.495  | 0.1962 | 0.337  | 0.7271 | -3.584 | 0.000338 |
| 7   | rs117074402 | 102950891 | A  | ADD  | 315   | 4.855  | 0.4422 | 2.041  | 11.55  | 3.574  | 0.000352 |
| 4   | rs2347131   | 110791361 | A  | ADD  | 316   | 1.996  | 0.194  | 1.365  | 2.919  | 3.563  | 0.000367 |
| 4   | rs2347132   | 110791413 | T  | ADD  | 316   | 1.996  | 0.194  | 1.365  | 2.919  | 3.563  | 0.000367 |
| 4   | rs2347133   | 110791543 | T  | ADD  | 316   | 1.996  | 0.194  | 1.365  | 2.919  | 3.563  | 0.000367 |
| 12  | rs10773127  | 125441359 | C  | ADD  | 316   | 2.324  | 0.2403 | 1.451  | 3.722  | 3.509  | 0.00045  |
| 11  | rs11020845  | 94322352  | T  | ADD  | 316   | 0.5217 | 0.1866 | 0.3619 | 0.7521 | -3.487 | 0.000489 |
| 11  | rs11020846  | 94322353  | A  | ADD  | 316   | 0.5217 | 0.1866 | 0.3619 | 0.7521 | -3.487 | 0.000489 |
| 1   | rs2303307   | 85039955  | A  | ADD  | 316   | 0.4824 | 0.2097 | 0.3198 | 0.7277 | -3.476 | 0.00051  |
| 5   | rs2303138   | 96350710  | A  | ADD  | 316   | 0.5558 | 0.1696 | 0.3986 | 0.7749 | -3.463 | 0.000534 |
| 14  | rs229586    | 65263347  | T  | ADD  | 316   | 0.5104 | 0.1954 | 0.348  | 0.7485 | -3.442 | 0.000577 |
| 14  | rs731715    | 52182081  | T  | ADD  | 316   | 0.5437 | 0.1781 | 0.3834 | 0.7709 | -3.421 | 0.000624 |
| 16  | rs2235648   | 1836796   | A  | ADD  | 316   | 1.835  | 0.1779 | 1.295  | 2.601  | 3.413  | 0.000643 |
| 13  | rs9554897   | 103383417 | C  | ADD  | 316   | 0.4372 | 0.2424 | 0.2719 | 0.7032 | -3.413 | 0.000644 |
| 1   | rs2994953   | 85031630  | A  | ADD  | 315   | 0.49   | 0.2091 | 0.3253 | 0.7382 | -3.412 | 0.000646 |
| 8   | rs16904753  | 133854970 | G  | ADD  | 316   | 3.309  | 0.3511 | 1.663  | 6.585  | 3.408  | 0.000654 |
| 8   | rs16904774  | 133900495 | A  | ADD  | 316   | 3.309  | 0.3511 | 1.663  | 6.585  | 3.408  | 0.000654 |
| 13  | rs9300756   | 103384824 | G  | ADD  | 314   | 0.4383 | 0.2424 | 0.2726 | 0.7049 | -3.403 | 0.000667 |
| 1   | rs2072035   | 175129946 | C  | ADD  | 310   | 0.5105 | 0.1979 | 0.3463 | 0.7524 | -3.397 | 0.000681 |
| 3   | rs6438869   | 124728626 | A  | ADD  | 316   | 0.552  | 0.1754 | 0.3914 | 0.7784 | -3.389 | 0.000703 |
| 6   | rs2296934   | 36931162  | G  | ADD  | 316   | 1.802  | 0.1742 | 1.28   | 2.535  | 3.379  | 0.000729 |
| 1   | rs2292191   | 84944989  | A  | ADD  | 316   | 0.5    | 0.2056 | 0.3342 | 0.7482 | -3.371 | 0.00075  |

**eTable 3 (continued). Single variant based association results of the top 100 SNP**

| CHR | SNP         | BP (hg19) | A1 | TEST | NMISS | OR     | SE     | L95     | U95    | STAT   | P        |
|-----|-------------|-----------|----|------|-------|--------|--------|---------|--------|--------|----------|
| 11  | rs57607909  | 94326765  | C  | ADD  | 316   | 0.5323 | 0.1871 | 0.3689  | 0.7682 | -3.369 | 0.000755 |
| 14  | rs12893215  | 102463407 | G  | ADD  | 316   | 0.5099 | 0.2003 | 0.3444  | 0.755  | -3.363 | 0.000771 |
| 14  | rs8010870   | 102493761 | G  | ADD  | 316   | 0.5099 | 0.2003 | 0.3444  | 0.755  | -3.363 | 0.000771 |
| 19  | rs8100718   | 45016116  | G  | ADD  | 316   | 0.5382 | 0.1843 | 0.3751  | 0.7724 | -3.361 | 0.000776 |
| 16  | rs7201813   | 1664931   | T  | ADD  | 296   | 1.962  | 0.2007 | 1.324   | 2.908  | 3.359  | 0.000781 |
| 8   | rs16893332  | 133906136 | C  | ADD  | 316   | 3.111  | 0.3379 | 1.604   | 6.034  | 3.359  | 0.000783 |
| 13  | rs1218825   | 28009920  | G  | ADD  | 314   | 0.5492 | 0.1793 | 0.3865  | 0.7804 | -3.343 | 0.000828 |
| 5   | rs27044     | 96118852  | G  | ADD  | 316   | 0.563  | 0.1734 | 0.4007  | 0.7909 | -3.313 | 0.000924 |
| 6   | rs17625497  | 53883843  | A  | ADD  | 314   | 3.608  | 0.3875 | 1.688   | 7.71   | 3.311  | 0.000928 |
| 19  | rs62104163  | 30021023  | C  | ADD  | 315   | 0.5294 | 0.1924 | 0.363   | 0.7719 | -3.305 | 0.000949 |
| 16  | rs9806826   | 1894912   | T  | ADD  | 313   | 0.5503 | 0.1812 | 0.3858  | 0.7849 | -3.297 | 0.000978 |
| 7   | rs1045012   | 98984354  | C  | ADD  | 316   | 0.1559 | 0.5686 | 0.05116 | 0.4752 | -3.269 | 0.001081 |
| 14  | rs17099370  | 62463129  | G  | ADD  | 316   | 0.5638 | 0.1759 | 0.3994  | 0.7958 | -3.258 | 0.001121 |
| 16  | rs8048410   | 1614097   | A  | ADD  | 316   | 1.751  | 0.172  | 1.25    | 2.453  | 3.257  | 0.001124 |
| 15  | rs1607017   | 76726465  | G  | ADD  | 316   | 1.709  | 0.1645 | 1.238   | 2.359  | 3.257  | 0.001126 |
| 3   | rs2259292   | 195501149 | C  | ADD  | 313   | 1.799  | 0.1805 | 1.263   | 2.563  | 3.254  | 0.001136 |
| 1   | rs28391411  | 206239574 | C  | ADD  | 316   | 2.38   | 0.2671 | 1.41    | 4.017  | 3.245  | 0.001173 |
| 1   | rs28602496  | 206239403 | T  | ADD  | 316   | 2.38   | 0.2671 | 1.41    | 4.017  | 3.245  | 0.001173 |
| 1   | rs28639473  | 206239415 | T  | ADD  | 316   | 2.38   | 0.2671 | 1.41    | 4.017  | 3.245  | 0.001173 |
| 4   | rs146127304 | 10542162  | G  | ADD  | 316   | 3.799  | 0.4117 | 1.695   | 8.514  | 3.242  | 0.001187 |
| 22  | rs9619601   | 36700175  | G  | ADD  | 316   | 2.835  | 0.3218 | 1.509   | 5.327  | 3.238  | 0.001203 |
| 10  | rs10825114  | 55582905  | G  | ADD  | 315   | 0.5426 | 0.1896 | 0.3742  | 0.7868 | -3.225 | 0.00126  |



**eTable 3 (continued). Single variant based association results of the top 100 SNP**

| CHR | SNP        | BP (hg19) | A1 | TEST | NMISS | OR     | SE     | L95     | U95    | STAT   | P        |
|-----|------------|-----------|----|------|-------|--------|--------|---------|--------|--------|----------|
| 16  | rs1861759  | 50745583  | G  | ADD  | 316   | 0.3962 | 0.2876 | 0.2255  | 0.6962 | -3.219 | 0.001285 |
| 16  | rs57576928 | 84067004  | T  | ADD  | 316   | 0.5098 | 0.2108 | 0.3373  | 0.7706 | -3.196 | 0.001393 |
| 20  | rs11543239 | 34214173  | A  | ADD  | 316   | 0.1834 | 0.5313 | 0.06473 | 0.5195 | -3.192 | 0.001411 |
| 20  | rs11543244 | 34220755  | T  | ADD  | 316   | 0.1834 | 0.5313 | 0.06473 | 0.5195 | -3.192 | 0.001411 |
| 19  | rs78580402 | 900951    | G  | ADD  | 314   | 1.984  | 0.2148 | 1.302   | 3.023  | 3.19   | 0.001422 |
| 10  | rs11016072 | 129901570 | T  | ADD  | 316   | 2.381  | 0.2726 | 1.395   | 4.063  | 3.182  | 0.001461 |
| 10  | rs7083622  | 129903094 | T  | ADD  | 316   | 2.381  | 0.2726 | 1.395   | 4.063  | 3.182  | 0.001461 |
| 11  | rs12277422 | 92623877  | A  | ADD  | 316   | 1.871  | 0.1972 | 1.271   | 2.754  | 3.176  | 0.001492 |
| 10  | rs34750407 | 129899922 | C  | ADD  | 315   | 2.368  | 0.2725 | 1.388   | 4.039  | 3.163  | 0.001563 |
| 11  | rs13941    | 62439569  | G  | ADD  | 316   | 0.3244 | 0.3561 | 0.1614  | 0.6519 | -3.162 | 0.001569 |
| 3   | rs1131199  | 112059768 | C  | ADD  | 316   | 0.5273 | 0.2027 | 0.3544  | 0.7844 | -3.158 | 0.00159  |
| 5   | rs2043112  | 38955796  | A  | ADD  | 314   | 1.684  | 0.1654 | 1.218   | 2.329  | 3.152  | 0.001621 |
| 15  | rs41279212 | 34032131  | A  | ADD  | 316   | 0.4707 | 0.2391 | 0.2946  | 0.7521 | -3.151 | 0.001625 |
| 9   | rs10758145 | 32630472  | C  | ADD  | 316   | 1.74   | 0.176  | 1.233   | 2.457  | 3.148  | 0.001646 |
| 16  | rs1742399  | 1962046   | C  | ADD  | 315   | 1.771  | 0.1817 | 1.241   | 2.529  | 3.147  | 0.001652 |
| 16  | rs1657140  | 1962047   | A  | ADD  | 315   | 0.5731 | 0.177  | 0.4051  | 0.8108 | -3.145 | 0.001663 |
| 12  | rs4258464  | 125438523 | C  | ADD  | 316   | 2.277  | 0.2623 | 1.362   | 3.807  | 3.138  | 0.001701 |
| 12  | rs4429156  | 125437019 | T  | ADD  | 316   | 2.277  | 0.2623 | 1.362   | 3.807  | 3.138  | 0.001701 |
| 12  | rs4447263  | 125434580 | C  | ADD  | 316   | 2.277  | 0.2623 | 1.362   | 3.807  | 3.138  | 0.001701 |
| 12  | rs4516060  | 125438516 | T  | ADD  | 316   | 2.277  | 0.2623 | 1.362   | 3.807  | 3.138  | 0.001701 |
| 2   | rs3732111  | 10784491  | G  | ADD  | 315   | 0.5927 | 0.1671 | 0.4271  | 0.8224 | -3.13  | 0.001748 |
| 2   | rs2290075  | 239353001 | T  | ADD  | 316   | 3.044  | 0.3558 | 1.516   | 6.114  | 3.129  | 0.001753 |

**eTable 3 (continued). Single variant based association results of the top 100 SNP**

| CHR | SNP        | BP (hg19) | A1 | TEST | NMISS | OR     | SE     | L95     | U95    | STAT   | P        |
|-----|------------|-----------|----|------|-------|--------|--------|---------|--------|--------|----------|
| 5   | rs27529    | 96126308  | G  | ADD  | 314   | 1.721  | 0.174  | 1.224   | 2.421  | 3.122  | 0.001797 |
| 22  | rs882753   | 50555635  | T  | ADD  | 315   | 1.978  | 0.219  | 1.288   | 3.039  | 3.115  | 0.001839 |
| 2   | rs16844790 | 160968628 | G  | ADD  | 315   | 2.228  | 0.2577 | 1.344   | 3.692  | 3.109  | 0.001879 |
| 20  | rs708973   | 3090848   | G  | ADD  | 316   | 2.063  | 0.2335 | 1.306   | 3.261  | 3.103  | 0.001918 |
| 14  | rs3818188  | 102446161 | A  | ADD  | 315   | 1.734  | 0.1777 | 1.224   | 2.457  | 3.1    | 0.001938 |
| 7   | rs17854665 | 99050039  | A  | ADD  | 316   | 0.1733 | 0.5663 | 0.0571  | 0.5257 | -3.096 | 0.001964 |
| 7   | rs34943973 | 99032517  | A  | ADD  | 316   | 0.1733 | 0.5663 | 0.0571  | 0.5257 | -3.096 | 0.001964 |
| 19  | rs1465723  | 45017249  | C  | ADD  | 316   | 2.215  | 0.2576 | 1.337   | 3.671  | 3.088  | 0.002016 |
| 13  | rs3742300  | 53421432  | C  | ADD  | 316   | 0.5882 | 0.172  | 0.4199  | 0.8241 | -3.085 | 0.002037 |
| 13  | rs3742301  | 53422553  | A  | ADD  | 316   | 0.5882 | 0.172  | 0.4199  | 0.8241 | -3.085 | 0.002037 |
| 21  | rs2236694  | 43221555  | A  | ADD  | 316   | 1.964  | 0.2188 | 1.279   | 3.016  | 3.085  | 0.002037 |
| 12  | rs80210207 | 70970293  | C  | ADD  | 316   | 0.3914 | 0.3041 | 0.2157  | 0.7104 | -3.085 | 0.002039 |
| 9   | rs61744789 | 101984093 | C  | ADD  | 315   | 3.47   | 0.4035 | 1.574   | 7.652  | 3.084  | 0.002044 |
| 10  | rs2254174  | 72535007  | C  | ADD  | 316   | 0.5873 | 0.1728 | 0.4186  | 0.8241 | -3.079 | 0.002076 |
| 5   | rs1048307  | 168093522 | A  | ADD  | 315   | 0.5822 | 0.1759 | 0.4124  | 0.8217 | -3.076 | 0.002095 |
| 22  | rs2272838  | 50584201  | C  | ADD  | 316   | 1.748  | 0.1817 | 1.224   | 2.496  | 3.073  | 0.002119 |
| 10  | rs7097319  | 52005153  | G  | ADD  | 302   | 0.5798 | 0.1779 | 0.4092  | 0.8217 | -3.064 | 0.002184 |
| 9   | rs10971047 | 32631369  | T  | ADD  | 316   | 1.771  | 0.1871 | 1.228   | 2.556  | 3.056  | 0.002245 |
| 19  | rs16979130 | 44981516  | T  | ADD  | 316   | 2.201  | 0.2588 | 1.325   | 3.656  | 3.049  | 0.002299 |
| 15  | rs56017612 | 43086885  | C  | ADD  | 316   | 0.225  | 0.4904 | 0.08605 | 0.5883 | -3.042 | 0.002351 |
| 17  | rs60994383 | 56247101  | A  | ADD  | 316   | 0.4751 | 0.2454 | 0.2937  | 0.7686 | -3.033 | 0.002424 |
| 19  | rs7951     | 6681991   | A  | ADD  | 316   | 2.346  | 0.2812 | 1.352   | 4.071  | 3.033  | 0.002425 |

**eTable 3 (continued). Single variant based association results of the top 100 SNP**

| CHR | SNP       | BP (hg19) | A1 | TEST | NMISS | OR     | SE     | L95    | U95    | STAT   | P        |
|-----|-----------|-----------|----|------|-------|--------|--------|--------|--------|--------|----------|
| 5   | rs30187   | 96124330  | C  | ADD  | 316   | 1.689  | 0.1729 | 1.203  | 2.37   | 3.03   | 0.002442 |
| 4   | rs3733227 | 83582211  | C  | ADD  | 315   | 1.678  | 0.1712 | 1.2    | 2.347  | 3.025  | 0.002489 |
| 22  | rs2272836 | 50582550  | A  | ADD  | 316   | 1.764  | 0.1877 | 1.221  | 2.549  | 3.024  | 0.002491 |
| 19  | rs7250872 | 1811603   | T  | ADD  | 316   | 0.5935 | 0.1731 | 0.4227 | 0.8332 | -3.014 | 0.002579 |
| 22  | rs2340601 | 50572473  | A  | ADD  | 315   | 1.73   | 0.1819 | 1.211  | 2.471  | 3.013  | 0.002584 |
| 22  | rs9617018 | 50528916  | T  | ADD  | 316   | 1.826  | 0.2    | 1.234  | 2.703  | 3.011  | 0.002604 |
| 16  | rs3765263 | 840378    | A  | ADD  | 316   | 1.676  | 0.1717 | 1.197  | 2.346  | 3.007  | 0.002637 |
| 22  | rs738792  | 24121378  | C  | ADD  | 316   | 1.769  | 0.19   | 1.219  | 2.568  | 3.003  | 0.002672 |
| 11  | rs1123991 | 4703165   | C  | ADD  | 316   | 0.5201 | 0.2182 | 0.3392 | 0.7977 | -2.996 | 0.002735 |
| 11  | rs7122644 | 6816875   | A  | ADD  | 316   | 0.5893 | 0.1766 | 0.4169 | 0.833  | -2.995 | 0.002745 |
| 5   | rs26653   | 96139250  | G  | ADD  | 316   | 1.677  | 0.1736 | 1.193  | 2.356  | 2.979  | 0.002895 |
| 19  | rs1051738 | 10577843  | A  | ADD  | 316   | 0.4459 | 0.2712 | 0.2621 | 0.7587 | -2.978 | 0.002898 |

**eTable 4. The gene-based association results of rare variants using VT test, one-sided burden test and SKAT-O, top 100 genes are shown for each test**

| Gene           | P (VT test) | Gene           | P (burden) | Gene           | P (SKAT-O) |
|----------------|-------------|----------------|------------|----------------|------------|
| <i>KRT20</i>   | 0.000488111 | <i>EXOC6</i>   | 0.000606   | <i>RDH16</i>   | 0.000883   |
| <i>EXOC6</i>   | 0.000648659 | <i>NTRK1</i>   | 0.001993   | <i>FLRT1</i>   | 0.00109    |
| <i>BAZ2B</i>   | 0.00106488  | <i>SH3BP4</i>  | 0.00215    | <i>SMCR7L</i>  | 0.001153   |
| <i>FBXO16</i>  | 0.00162356  | <i>RAB12</i>   | 0.002205   | <i>CAPN3</i>   | 0.001161   |
| <i>TM4SF20</i> | 0.00172244  | <i>FBXO16</i>  | 0.002244   | <i>EXOC6</i>   | 0.001265   |
| <i>SH3BP4</i>  | 0.00238541  | <i>ROR2</i>    | 0.002799   | <i>SLCO1B1</i> | 0.001621   |
| <i>CCDC150</i> | 0.00254684  | <i>SDF4</i>    | 0.003167   | <i>CCR3</i>    | 0.001625   |
| <i>ROR2</i>    | 0.00301334  | <i>FNDC1</i>   | 0.003325   | <i>FBXO16</i>  | 0.00176    |
| <i>TTC12</i>   | 0.00328947  | <i>ALPK3</i>   | 0.004684   | <i>TRIM16</i>  | 0.001769   |
| <i>CNTNAP4</i> | 0.00344743  | <i>MELK</i>    | 0.004839   | <i>UBASH3B</i> | 0.001909   |
| <i>KATNB1</i>  | 0.00345168  | <i>TTC12</i>   | 0.004979   | <i>GAB2</i>    | 0.002059   |
| <i>SDF4</i>    | 0.00434109  | <i>ABAT</i>    | 0.004984   | <i>NSD1</i>    | 0.002124   |
| <i>KCNIP2</i>  | 0.00477002  | <i>OR6C3</i>   | 0.005362   | <i>AMBRA1</i>  | 0.002171   |
| <i>NTRK1</i>   | 0.00483927  | <i>TM4SF20</i> | 0.00639    | <i>TM4SF20</i> | 0.002183   |
| <i>TNSI</i>    | 0.00501074  | <i>FAM3A</i>   | 0.006598   | <i>ROBO2</i>   | 0.002372   |
| <i>FNDC1</i>   | 0.00501612  | <i>BAZ2B</i>   | 0.007191   | <i>CPPED1</i>  | 0.002507   |
| <i>ATG2A</i>   | 0.00608167  | <i>IQSEC1</i>  | 0.007372   | <i>GEMIN5</i>  | 0.002613   |
| <i>NUP210</i>  | 0.0061296   | <i>UNC79</i>   | 0.007499   | <i>CSK</i>     | 0.002702   |
| <i>VAV2</i>    | 0.00660689  | <i>CHTOP</i>   | 0.007663   | <i>TPST2</i>   | 0.002719   |
| <i>KANSL1L</i> | 0.00661626  | <i>KANSL1L</i> | 0.007782   | <i>FERMT1</i>  | 0.00273    |
| <i>ZNF804A</i> | 0.00669216  | <i>KALRN</i>   | 0.007887   | <i>SETD1A</i>  | 0.002934   |
| <i>OR6C3</i>   | 0.00688976  | <i>KIF12</i>   | 0.008041   | <i>POLR1B</i>  | 0.00301    |

**eTable 4 (continued). The gene-based association results of rare variants using VT test, one-sided burden test and SKAT-O, top 100 genes are shown for each test**

| Gene             | P (VT test) | Gene             | P (burden) | Gene            | P (SKAT-O) |
|------------------|-------------|------------------|------------|-----------------|------------|
| <i>IKBKAP</i>    | 0.00689995  | <i>SOS1</i>      | 0.00806    | <i>HPS1</i>     | 0.003327   |
| <i>DNAH14</i>    | 0.00692042  | <i>SAMD11</i>    | 0.008088   | <i>MRPS35</i>   | 0.003493   |
| <i>BLK</i>       | 0.00724263  | <i>DBR1</i>      | 0.008408   | <i>CRELD2</i>   | 0.003506   |
| <i>KALRN</i>     | 0.00745871  | <i>BLK</i>       | 0.008469   | <i>COG1</i>     | 0.003513   |
| <i>MELK</i>      | 0.00749866  | <i>XPNPEP2</i>   | 0.008573   | <i>ZNF646</i>   | 0.003731   |
| <i>DSE</i>       | 0.00806916  | <i>SUSD4</i>     | 0.009241   | <i>STAC2</i>    | 0.003781   |
| <i>SIGLEC15</i>  | 0.00808781  | <i>KATNB1</i>    | 0.009453   | <i>TAL2</i>     | 0.003957   |
| <i>ALPK3</i>     | 0.00832838  | <i>UNC45B</i>    | 0.009466   | <i>ATG4D</i>    | 0.004086   |
| <i>HPS1</i>      | 0.00839832  | <i>GLTPD1</i>    | 0.009715   | <i>NPY4R</i>    | 0.004098   |
| <i>SLX4</i>      | 0.00866873  | <i>CAPS2</i>     | 0.010456   | <i>CEP72</i>    | 0.004167   |
| <i>LRCH1</i>     | 0.00881057  | <i>PIK3R5</i>    | 0.010794   | <i>APIG2</i>    | 0.004501   |
| <i>SAMD11</i>    | 0.00884397  | <i>SIGLEC15</i>  | 0.010828   | <i>NEUROD4</i>  | 0.004518   |
| <i>CAPS2</i>     | 0.00896861  | <i>ATMIN</i>     | 0.010963   | <i>FGF22</i>    | 0.004533   |
| <i>CCDC24</i>    | 0.00913242  | <i>KCNIP2</i>    | 0.011227   | <i>CDCA4</i>    | 0.004943   |
| <i>GLTPD1</i>    | 0.00918033  | <i>MYO9B</i>     | 0.011227   | <i>GRIK4</i>    | 0.004955   |
| <i>SOS1</i>      | 0.00972898  | <i>NUP188</i>    | 0.01158    | <i>SBNO1</i>    | 0.005023   |
| <i>MYO9B</i>     | 0.00978337  | <i>SEMA4C</i>    | 0.011599   | <i>KIF9</i>     | 0.005023   |
| <i>TNFRSF10D</i> | 0.0101376   | <i>DSE</i>       | 0.011657   | <i>B4GALNT4</i> | 0.005204   |
| <i>CEP72</i>     | 0.0101818   | <i>TNFRSF10D</i> | 0.011676   | <i>FAM151A</i>  | 0.005297   |
| <i>OR52E8</i>    | 0.0105501   | <i>HECTD4</i>    | 0.011696   | <i>RSPH6A</i>   | 0.005397   |

**eTable 4 (continued). The gene-based association results of rare variants using VT test, one-sided burden test and SKAT-O, top 100 genes are shown for each test**

| Gene            | P (VT test) | Gene           | P (burden) | Gene           | P (SKATthe-O) |
|-----------------|-------------|----------------|------------|----------------|---------------|
| <i>CAPN15</i>   | 0.0106952   | <i>CCDC24</i>  | 0.012142   | <i>SH3BP4</i>  | 0.005397      |
| <i>PIK3R5</i>   | 0.0109632   | <i>TMEM143</i> | 0.012335   | <i>OR6T1</i>   | 0.005417      |
| <i>ITPKB</i>    | 0.0109804   | <i>ZNF804A</i> | 0.012647   | <i>RSAD2</i>   | 0.005494      |
| <i>SLC12A4</i>  | 0.0112812   | <i>LRP5L</i>   | 0.012856   | <i>RARS2</i>   | 0.005628      |
| <i>EML6</i>     | 0.0115037   | <i>STON2</i>   | 0.013553   | <i>FNDC1</i>   | 0.005816      |
| <i>TACC2</i>    | 0.0118946   | <i>IKBKAP</i>  | 0.01382    | <i>ZBTB8B</i>  | 0.0059        |
| <i>CTC1</i>     | 0.0121212   | <i>PRAMI</i>   | 0.013848   | <i>PHF2</i>    | 0.005904      |
| <i>C17orf64</i> | 0.0122699   | <i>SBNO1</i>   | 0.014099   | <i>SLC40A1</i> | 0.005968      |
| <i>DBR1</i>     | 0.0122699   | <i>COL5A2</i>  | 0.014156   | <i>CHD9</i>    | 0.006037      |
| <i>MYO10</i>    | 0.0122915   | <i>ADAM15</i>  | 0.014418   | <i>SNAPC4</i>  | 0.006127      |
| <i>NUP188</i>   | 0.0127389   | <i>DAK</i>     | 0.014614   | <i>GREB1</i>   | 0.006181      |
| <i>RNF157</i>   | 0.012951    | <i>FAM43A</i>  | 0.01566    | <i>ABHD15</i>  | 0.006235      |
| <i>SBNO1</i>    | 0.012975    | <i>ZNF662</i>  | 0.016393   | <i>WNK4</i>    | 0.00626       |
| <i>OR4D10</i>   | 0.01322     | <i>FAM3D</i>   | 0.016413   | <i>KRT27</i>   | 0.006331      |
| <i>UNC79</i>    | 0.0132701   | <i>ACAN</i>    | 0.016509   | <i>UNC45B</i>  | 0.006345      |
| <i>HYOU1</i>    | 0.0133206   | <i>GPR139</i>  | 0.016687   | <i>ZNF83</i>   | 0.006359      |
| <i>PTPRF</i>    | 0.0134486   | <i>OR4M2</i>   | 0.016929   | <i>CPZ</i>     | 0.006444      |
| <i>ATXN10</i>   | 0.0135005   | <i>CEP72</i>   | 0.017115   | <i>SYNE1</i>   | 0.006461      |
| <i>SKIV2L2</i>  | 0.0138751   | <i>MRI</i>     | 0.017284   | <i>COL8A1</i>  | 0.006491      |
| <i>AKAP5</i>    | 0.0139581   | <i>OR4D10</i>  | 0.017456   | <i>C3orf67</i> | 0.006505      |

**eTable 4 (continued). The gene-based association results of rare variants using VT test, one-sided burden test and SKAT-O, top 100 genes are shown for each test**

| Gene               | P (VT test) | Gene               | P (burden) | Gene            | P (SKAT-O) |
|--------------------|-------------|--------------------|------------|-----------------|------------|
| <i>DAK</i>         | 0.014014    | <i>LRCH1</i>       | 0.017522   | <i>PFKL</i>     | 0.006553   |
| <i>ESYT2</i>       | 0.0144778   | <i>RUSC2</i>       | 0.01761    | <i>CACTIN</i>   | 0.006558   |
| <i>ALDH9A1</i>     | 0.0144928   | <i>PALM2-AKAP2</i> | 0.017767   | <i>PDHA2</i>    | 0.006579   |
| <i>DLGAP4</i>      | 0.014862    | <i>SAMD3</i>       | 0.017789   | <i>TANGO6</i>   | 0.006593   |
| <i>CCDC62</i>      | 0.0154696   | <i>STK33</i>       | 0.017834   | <i>STXBP3</i>   | 0.006653   |
| <i>UNC45B</i>      | 0.0155039   | <i>GDF6</i>        | 0.017857   | <i>ABHD5</i>    | 0.006687   |
| <i>HECTD4</i>      | 0.0160367   | <i>DUSP12</i>      | 0.018158   | <i>DUOX2</i>    | 0.006853   |
| <i>SEMA4C</i>      | 0.0161105   | <i>CCDC30</i>      | 0.018519   | <i>DTX2</i>     | 0.006886   |
| <i>ANKFY1</i>      | 0.0161663   | <i>KCNA5</i>       | 0.018543   | <i>NTRK1</i>    | 0.007036   |
| <i>SLC19A2</i>     | 0.016298    | <i>KRR1</i>        | 0.018945   | <i>FIGLA</i>    | 0.007087   |
| <i>SVIL</i>        | 0.016317    | <i>THEMIS</i>      | 0.019444   | <i>PRAMI</i>    | 0.007127   |
| <i>DNAH3</i>       | 0.0163743   | <i>ANGPT4</i>      | 0.019663   | <i>PCDH7</i>    | 0.007159   |
| <i>MRPS35</i>      | 0.0163934   | <i>INPP5J</i>      | 0.019691   | <i>POCIA</i>    | 0.007203   |
| <i>ATMIN</i>       | 0.0166865   | <i>GLP2R</i>       | 0.019886   | <i>FOSL2</i>    | 0.007204   |
| <i>ZNF215</i>      | 0.0166865   | <i>COX18</i>       | 0.020115   | <i>KLHDC7A</i>  | 0.007269   |
| <i>SLC22A16</i>    | 0.0168067   | <i>POMT1</i>       | 0.020319   | <i>MPHOSPH8</i> | 0.007287   |
| <i>COX18</i>       | 0.017199    | <i>ZNF528</i>      | 0.020438   | <i>TTC12</i>    | 0.007335   |
| <i>IQSEC1</i>      | 0.018018    | <i>ZNF609</i>      | 0.020468   | <i>POMT1</i>    | 0.007572   |
| <i>PALM2-AKAP2</i> | 0.0185923   | <i>ADHFE1</i>      | 0.02068    | <i>ISMI</i>     | 0.007602   |
| <i>PRAMI</i>       | 0.0186667   | <i>C16orf11</i>    | 0.02068    | <i>SH3BP2</i>   | 0.007722   |

**eTable 4 (continued). The gene-based association results of rare variants using VT test, one-sided burden test and SKAT-O, top 100 genes are shown for each test**

| Gene             | P (VT test) | Gene            | P (burden) | Gene            | P (SKAT-O) |
|------------------|-------------|-----------------|------------|-----------------|------------|
| <i>RGS16</i>     | 0.0188934   | <i>PCDHA10</i>  | 0.020802   | <i>TMEM200B</i> | 0.007795   |
| <i>PADI3</i>     | 0.0189189   | <i>TNKS2</i>    | 0.021116   | <i>LRCHI</i>    | 0.007901   |
| <i>ZMYND10</i>   | 0.0190217   | <i>CIB4</i>     | 0.021407   | <i>RBFOX2</i>   | 0.007909   |
| <i>POMT1</i>     | 0.0190736   | <i>GPA33</i>    | 0.021407   | <i>OR8B8</i>    | 0.007929   |
| <i>CAND2</i>     | 0.0191781   | <i>TM9SF4</i>   | 0.02144    | <i>XIRP1</i>    | 0.008003   |
| <i>INPP5J</i>    | 0.0192572   | <i>IQGAP2</i>   | 0.021539   | <i>ITSN2</i>    | 0.008008   |
| <i>KCNA5</i>     | 0.0194175   | <i>NRXN1</i>    | 0.021638   | <i>MNT</i>      | 0.00808    |
| <i>GPA33</i>     | 0.0196353   | <i>FAM211A</i>  | 0.021773   | <i>RAPGEF5</i>  | 0.008134   |
| <i>RUSC2</i>     | 0.019774    | <i>OR4Q3</i>    | 0.021875   | <i>CNKS3</i>    | 0.008211   |
| <i>KIF19</i>     | 0.0199715   | <i>OR52E8</i>   | 0.021909   | <i>SPATS1</i>   | 0.008237   |
| <i>SLC7A9</i>    | 0.0200286   | <i>COX10</i>    | 0.022187   | <i>LMOD2</i>    | 0.008282   |
| <i>ZNF768</i>    | 0.0201439   | <i>PRKD3</i>    | 0.022258   | <i>TRIM3</i>    | 0.008316   |
| <i>C10orf120</i> | 0.0202899   | <i>XPO6</i>     | 0.022258   | <i>CCDC39</i>   | 0.008534   |
| <i>INO80</i>     | 0.0203193   | <i>CSK</i>      | 0.022364   | <i>ZNF778</i>   | 0.00858    |
| <i>GPR139</i>    | 0.0208955   | <i>KIAA1009</i> | 0.02269    | <i>TAF2</i>     | 0.0086     |
| <i>COL5A2</i>    | 0.0215054   | <i>GEMIN4</i>   | 0.022801   | <i>CD37</i>     | 0.008655   |
| <i>CDH3</i>      | 0.0215716   | <i>RNF151</i>   | 0.023217   | <i>C19orf80</i> | 0.008911   |
| <i>C5orf64</i>   | 0.0217054   | <i>TIE1</i>     | 0.023649   | <i>CIB4</i>     | 0.008912   |



**eTable 5. Nominally significant rare variant association (gene-based) results on candidate genes**

| Gene           | Source                                 | Variant(s)                                                                                                                | Damaging non-synonymous |              |               |              |                        |
|----------------|----------------------------------------|---------------------------------------------------------------------------------------------------------------------------|-------------------------|--------------|---------------|--------------|------------------------|
|                |                                        |                                                                                                                           | # var                   | P (burden)   | P (VT)        | P (SKATO)    | Allele count (Non/Res) |
| <i>GRID1</i>   | Ionotropic Glutamate Receptor Genes    | p.P998S, p.A896V, rs150878754, p.D290N                                                                                    | 4                       | <b>0.013</b> | <b>0.026</b>  | <b>0.083</b> | 4/0                    |
| <i>ZNF804A</i> | Candidate reviewed by Changasi         | rs139826553, rs78607324, p.T932N                                                                                          | 3                       | <b>0.014</b> | <b>0.0067</b> | <b>0.012</b> | 6/0                    |
| <i>NRXN1</i>   | Candidate reviewed by Changasi         | rs199701703, rs202006815, rs200935246, p.G263S, p.V179I, p.I100V, p.L804I, p.I754T, rs192069355, p.N274S, p.F150Y, p.T84K | 12                      | <b>0.026</b> | <b>0.03</b>   | <b>0.012</b> | 12/4                   |
| <i>CYP2J2</i>  | CYP450 gene                            | p.N300K, p.R158H, p.L126F                                                                                                 | 3                       | <b>0.043</b> | <b>0.028</b>  | <b>0.062</b> | 4/0                    |
| <i>GABRA6</i>  | DrugBank andidate, GABA Receptor Genes | p.R84H, p.N128S, rs34907804                                                                                               | 3                       | <b>0.047</b> | <b>0.057</b>  | <b>0.052</b> | 3/0                    |
| <i>GRM7</i>    | Metabotropic Glutamate Receptor Genes  | p.Q258H, p.P438T, p.Q577K                                                                                                 | 3                       | <b>0.049</b> | <b>0.04</b>   | <b>0.22</b>  | 3/0                    |

Abbreviation: # var, number of variants; P; P-value; Non, Non-responder; Res, Responder. Damaging variants are underlined. Nominal significant associations (P < 0.05) are given in bold.

**eTable 6. Set-based association result of rare (MAF < 1%) damaging non-synonymous variant in the 79 candidate gene sets**

| Gene set                                                    | Number of variants | allele count (Non/res) | raw P (burden test) | q value by histo method (pi0= 0.933544) | q value by BH method (pi0= 1) |
|-------------------------------------------------------------|--------------------|------------------------|---------------------|-----------------------------------------|-------------------------------|
| reduced NMDA-mediated synaptic currents                     | 49                 | 42/19                  | 0.0010143           | 0.04625231                              | 0.04954485                    |
| reduced AMPA-mediated synaptic currents                     | 43                 | 36/14                  | 0.0012543           | 0.04625231                              | 0.04954485                    |
| abnormal AMPA-mediated synaptic currents                    | 20                 | 17/6                   | 0.0120609           | 0.23748422                              | 0.25438987                    |
| abnormal GABA-mediated receptor currents                    | 55                 | 43/24                  | 0.0128805           | 0.23748422                              | 0.25438987                    |
| abnormal long term depression                               | 56                 | 49/31                  | 0.0303262           | 0.42450664                              | 0.45472576                    |
| Long-term_potentiation                                      | 192                | 149/116                | 0.0405696           | 0.42450664                              | 0.45472576                    |
| Long-term_depression                                        | 210                | 163/128                | 0.0478364           | 0.42450664                              | 0.45472576                    |
| decreased synaptic glutamate release                        | 33                 | 26/14                  | 0.0479007           | 0.42450664                              | 0.45472576                    |
| REACTOME_GABA_A_RECEPTOR_ACTIVATION                         | 16                 | 15/7                   | 0.0518042           | 0.42450664                              | 0.45472576                    |
| abnormal synaptic transmission                              | 104                | 80/60                  | 0.0702003           | 0.49344139                              | 0.52856773                    |
| abnormal paired-pulse inhibition                            | 68                 | 51/37                  | 0.0790823           | 0.49344139                              | 0.52856773                    |
| abnormal neurotransmitter level                             | 31                 | 26/16                  | 0.0816229           | 0.49344139                              | 0.52856773                    |
| decreased synaptic depression                               | 52                 | 37/25                  | 0.0869795           | 0.49344139                              | 0.52856773                    |
| absent long term depression                                 | 97                 | 70/54                  | 0.0946893           | 0.49880971                              | 0.53431819                    |
| REACTOME_TRAFFICKING_OF_GLUR2_CONTAININ<br>G_AMPA_RECEPTORS | 20                 | 13/7                   | 0.101887            | 0.50094442                              | 0.53660487                    |
| decreased prepulse inhibition                               | 174                | 122/101                | 0.118789            | 0.54754305                              | 0.58652069                    |
| REACTOME_Glutamate_NEUROTRANSMITTER_R<br>RELEASE_CYCLE      | 23                 | 15/10                  | 0.13055             | 0.55994319                              | 0.59980355                    |

**eTable 6 (continued). Set-based association result of rare (MAF < 1%) damaging non-synonymous variant in the 79 candidate gene sets**

| Gene set                                                                            | Number of variants | allele count (Non/res) | raw P (burden test) | q value by histo method (pi0= 0.933544) | q value by BH method (pi0= 1) |
|-------------------------------------------------------------------------------------|--------------------|------------------------|---------------------|-----------------------------------------|-------------------------------|
| Retrograde_endocannabinoid_signaling                                                | 300                | 210/183                | 0.139342            | 0.55994319                              | 0.59980355                    |
| decreased excitatory postsynaptic current amplitude                                 | 58                 | 42/32                  | 0.147417            | 0.55994319                              | 0.59980355                    |
| REACTOME_TRAFFICKING_OF_AMPA_RECEPTORS                                              | 50                 | 35/26                  | 0.151849            | 0.55994319                              | 0.59980355                    |
| Serotonergic_synapse                                                                | 307                | 216/193                | 0.216146            | 0.67587496                              | 0.72398809                    |
| REACTOME_NEUROTRANSMITTER_RELEASE_CYCLE                                             | 73                 | 49/41                  | 0.22423             | 0.67587496                              | 0.72398809                    |
| abnormal excitatory postsynaptic currents                                           | 316                | 218/198                | 0.235202            | 0.67587496                              | 0.72398809                    |
| REACTOME_RAS_ACTIVATION_UOPN_CA2_INFUX_THROUGH_NMDA_RECEPTOR                        | 55                 | 43/36                  | 0.255812            | 0.67587496                              | 0.72398809                    |
| REACTOME_TRANSMISSION_ACROSS_CHEMICAL_SYNAPSES                                      | 447                | 305/283                | 0.257819            | 0.67587496                              | 0.72398809                    |
| abnormal channel response                                                           | 85                 | 60/52                  | 0.267005            | 0.67587496                              | 0.72398809                    |
| REACTOME_ACTIVATION_OF_NMDA_RECEPTOR_UPON_Glutamate_BINDING_AND_POSTSYNAPTIC_EVENTS | 111                | 79/70                  | 0.272692            | 0.67587496                              | 0.72398809                    |
| REACTOME_GABA_RECEPTOR_ACTIVATION                                                   | 104                | 70/61                  | 0.27745             | 0.67587496                              | 0.72398809                    |
| REACTOME_CREB_PHOSPHORYLATION_THROUGH_THE_ACTIVATION_OF_RAS                         | 70                 | 51/44                  | 0.279722            | 0.67587496                              | 0.72398809                    |
| REACTOME_INHIBITION_OF_VOLTAGE_GATED_CA2_CHANNELS_VIA_GBETA_GAMMA_SUBUNITS          | 16                 | 12/9                   | 0.284366            | 0.67587496                              | 0.72398809                    |

**eTable 6 (continued). Set-based association result of rare (MAF < 1%) damaging non-synonymous variant in the 79 candidate gene sets**

| Gene set                                                                                        | Number of variants | allele count (Non/res) | raw P (burden test) | q value by histo method (pi0= 0.933544) | q value by BH method (pi0= 1) |
|-------------------------------------------------------------------------------------------------|--------------------|------------------------|---------------------|-----------------------------------------|-------------------------------|
| reduced long term depression                                                                    | 141                | 97/86                  | 0.289811            | 0.67587496                              | 0.72398809                    |
| REACTOME_NEUROTRANSMITTER_RECEPTOR_BINDING_AND_DOWNSTREAM_TRANSMISSION_IN_THE_POSTSYNAPTIC_CELL | 317                | 220/204                | 0.293261            | 0.67587496                              | 0.72398809                    |
| Dopaminergic_synapse                                                                            | 271                | 187/173                | 0.308275            | 0.68894792                              | 0.73799167                    |
| REACTOME_POST_NMDA_RECEPTOR_ACTIVATION_EVENTS                                                   | 102                | 73/67                  | 0.355977            | 0.71971038                              | 0.770944                      |
| REACTOME_UNBLOCKING_OF_NMDA_RECEPTOR_Glutamate_BINDING_AND_ACTIVATION                           | 52                 | 37/33                  | 0.370346            | 0.71971038                              | 0.770944                      |
| Cholinergic_synapse                                                                             | 311                | 220/208                | 0.37777             | 0.71971038                              | 0.770944                      |
| abnormal excitatory postsynaptic potential                                                      | 219                | 147/139                | 0.388845            | 0.71971038                              | 0.770944                      |
| REACTOME_GABA_SYNTHESIS_RELEASE_REUPTAKE_AND_DEGRADATION                                        | 26                 | 17/16                  | 0.403326            | 0.71971038                              | 0.770944                      |
| abnormal miniature excitatory postsynaptic currents                                             | 270                | 177/168                | 0.409004            | 0.71971038                              | 0.770944                      |
| reduced long term potentiation                                                                  | 380                | 238/227                | 0.416342            | 0.71971038                              | 0.770944                      |
| abnormal synaptic dopamine release                                                              | 32                 | 24/22                  | 0.420465            | 0.71971038                              | 0.770944                      |
| REACTOME_INWARDLY_RECTIFYING_K_CHANNELS                                                         | 37                 | 27/25                  | 0.443223            | 0.71971038                              | 0.770944                      |
| abnormal inhibitory postsynaptic currents                                                       | 159                | 116/111                | 0.44664             | 0.71971038                              | 0.770944                      |
| REACTOME_VOLTAGE_GATED_POTASSIUM_CHANNELS                                                       | 130                | 98/95                  | 0.486099            | 0.71971038                              | 0.770944                      |

**eTable 6 (continued). Set-based association result of rare (MAF < 1%) damaging non-synonymous variant in the 79 candidate gene sets**

| Gene set                                                                         | Number of variants | allele count (Non/res) | raw P (burden test) | q value by histo method (pi0= 0.933544) | q value by BH method (pi0= 1) |
|----------------------------------------------------------------------------------|--------------------|------------------------|---------------------|-----------------------------------------|-------------------------------|
| reduced long term depression                                                     | 141                | 97/86                  | 0.289811            | 0.67587496                              | 0.72398809                    |
| abnormal prepulse inhibition                                                     | 42                 | 31/30                  | 0.489138            | 0.71971038                              | 0.770944                      |
| REACTOME_NOREPINEPHRINE_NEUROTRANSMITTER_RELEASE_CYCLE                           | 12                 | 4/8                    | 0.708937            | 0.71971038                              | 0.770944                      |
| REACTOME_TANDEM_PORE_DOMAIN_POTASSIUM_CHANNELS                                   | 21                 | 8/16                   | 0.722134            | 0.71971038                              | 0.770944                      |
| decreased post-tetanic potentiation                                              | 32                 | 18/20                  | 0.733359            | 0.71971038                              | 0.770944                      |
| REACTOME_GABA_B_RECEPTOR_ACTIVATION                                              | 82                 | 48/51                  | 0.735513            | 0.71971038                              | 0.770944                      |
| REACTOME_HIGHLY_CALCIUM_PERMEABLE_POSTSYNAPTIC_NICOTINIC_ACETYLCHOLINE_RECEPTORS | 38                 | 22/26                  | 0.738621            | 0.71971038                              | 0.770944                      |
| abnormal long term potentiation                                                  | 94                 | 55/58                  | 0.739286            | 0.71971038                              | 0.770944                      |
| abnormal synaptic acetylcholine release                                          | 33                 | 23/27                  | 0.739834            | 0.71971038                              | 0.770944                      |
| abnormal miniature endplate potential                                            | 178                | 117/134                | 0.739993            | 0.71971038                              | 0.770944                      |
| decreased paired-pulse facilitation                                              | 43                 | 24/30                  | 0.741595            | 0.71971038                              | 0.770944                      |
| REACTOME_ACETYLCHOLINE_BINDING_AND_DOWNSTREAM_EVENTS                             | 49                 | 28/32                  | 0.743772            | 0.71971038                              | 0.770944                      |
| REACTOME_CREB_PHOSPHORYLATION_THROUGH_THE_ACTIVATION_OF_CAMKII                   | 44                 | 31/31                  | 0.744785            | 0.71971038                              | 0.770944                      |
| enhanced long term potentiation                                                  | 204                | 140/145                | 0.745396            | 0.71971038                              | 0.770944                      |

**eTable 6 (continued). Set-based association result of rare (MAF < 1%) damaging non-synonymous variant in the 79 candidate gene sets**

| Gene set                                                        | Number of variants | allele count (Non/res) | raw P (burden test) | q value by histo method (pi0= 0.933544) | q value by BH method (pi0= 1) |
|-----------------------------------------------------------------|--------------------|------------------------|---------------------|-----------------------------------------|-------------------------------|
| Neurotrophin_signaling_pathway                                  | 270                | 177/187                | 0.746169            | 0.71971038                              | 0.770944                      |
| REACTOME_POTASSIUM_CHANNELS                                     | 208                | 142/149                | 0.74635             | 0.71971038                              | 0.770944                      |
| enhanced paired-pulse facilitation                              | 101                | 72/71                  | 0.747037            | 0.71971038                              | 0.770944                      |
| Synaptic_vesicle_cycle                                          | 167                | 111/113                | 0.748084            | 0.71971038                              | 0.770944                      |
| REACTOME_ADENYLATE_CYCLASE_INHIBITORY_PATHWAY                   | 66                 | 36/42                  | 0.749795            | 0.71971038                              | 0.770944                      |
| abnormal miniature inhibitory postsynaptic currents             | 72                 | 42/44                  | 0.751976            | 0.71971038                              | 0.770944                      |
| Glutamatergic_synapse                                           | 395                | 270/267                | 0.753088            | 0.71971038                              | 0.770944                      |
| REACTOME_ACTIVATION_OF_KAINATE_RECEPTORS_UPON_Glutamate_BINDING | 57                 | 41/51                  | 0.753698            | 0.71971038                              | 0.770944                      |
| abnormal CNS synaptic transmission                              | 336                | 229/227                | 0.754792            | 0.71971038                              | 0.770944                      |
| GABAergic_synapse                                               | 209                | 137/135                | 0.755213            | 0.71971038                              | 0.770944                      |
| decreased neurotransmitter release                              | 86                 | 54/54                  | 0.757449            | 0.71971038                              | 0.770944                      |
| abnormal endplate potential                                     | 81                 | 58/58                  | 0.758989            | 0.71971038                              | 0.770944                      |
| REACTOME_DOPAMINE_NEUROTRANSMITTER_RELEASE_CYCLE                | 17                 | 7/10                   | 0.759919            | 0.71971038                              | 0.770944                      |
| REACTOME_ACETYLCHOLINE_NEUROTRANSMITTER_RELEASE_CYCLE           | 15                 | 11/12                  | 0.762093            | 0.71971038                              | 0.770944                      |
| abnormal NMDA-mediated synaptic currents                        | 28                 | 15/16                  | 0.763856            | 0.71971038                              | 0.770944                      |
| abnormal PNS synaptic transmission                              | 30                 | 15/26                  | 0.766586            | 0.71971038                              | 0.770944                      |
| abnormal glutamate-mediated receptor currents                   | 34                 | 22/27                  | 0.767735            | 0.71971038                              | 0.770944                      |

**eTable 6 (continued). Set-based association result of rare (MAF < 1%) damaging non-synonymous variant in the 79 candidate gene sets**

| Gene set                                                     | Number of variants | allele count (Non/res) | raw P (burden test) | q value by histo method (pi0= 0.933544) | q value by BH method (pi0= 1) |
|--------------------------------------------------------------|--------------------|------------------------|---------------------|-----------------------------------------|-------------------------------|
| REACTOME_IONOTROPIC_ACTIVITY_OF_KAINATE_RECEPTORS            | 30                 | 19/28                  | 0.768246            | 0.71971038                              | 0.770944                      |
| abnormal neurotransmitter secretion                          | 37                 | 22/29                  | 0.768788            | 0.71971038                              | 0.770944                      |
| increased prepulse inhibition                                | 40                 | 23/28                  | 0.768811            | 0.71971038                              | 0.770944                      |
| REACTOME_PRESYNAPTIC_NICOTINIC_ACETYLCHOLINE_RECEPTORS       | 42                 | 23/30                  | 0.769227            | 0.71971038                              | 0.770944                      |
| increased synaptic depression                                | 52                 | 35/36                  | 0.770944            | 0.71971038                              | 0.770944                      |
| Retrograde_endocannabinoid_signaling                         | 300                | 210/183                | 0.139342            | 0.55994319                              | 0.59980355                    |
| decreased excitatory postsynaptic current amplitude          | 58                 | 42/32                  | 0.147417            | 0.55994319                              | 0.59980355                    |
| REACTOME_TRAFFICKING_OF_AMPA_RECEPTORS                       | 50                 | 35/26                  | 0.151849            | 0.55994319                              | 0.59980355                    |
| Serotonergic_synapse                                         | 307                | 216/193                | 0.216146            | 0.67587496                              | 0.72398809                    |
| REACTOME_NEUROTRANSMITTER_RELEASE_CYCLE                      | 73                 | 49/41                  | 0.22423             | 0.67587496                              | 0.72398809                    |
| abnormal excitatory postsynaptic currents                    | 316                | 218/198                | 0.235202            | 0.67587496                              | 0.72398809                    |
| REACTOME_RAS_ACTIVATION_UOPN_CA2_INFUX_THROUGH_NMDA_RECEPTOR | 55                 | 43/36                  | 0.255812            | 0.67587496                              | 0.72398809                    |
| REACTOME_TRANSMISSION_ACROSS_CHEMICAL_SYNAPSES               | 447                | 305/283                | 0.257819            | 0.67587496                              | 0.72398809                    |

**eTable 6 (continued). Set-based association result of rare (MAF < 1%) damaging non-synonymous variant in the 79 candidate gene sets**

| Gene set                                                                                        | Number of variants | allele count (Non/res) | raw P (burden test) | q value by histo method (pi0= 0.933544) | q value by BH method (pi0= 1) |
|-------------------------------------------------------------------------------------------------|--------------------|------------------------|---------------------|-----------------------------------------|-------------------------------|
| abnormal channel response                                                                       | 85                 | 60/52                  | 0.267005            | 0.67587496                              | 0.72398809                    |
| REACTOME_ACTIVATION_OF_NMDA_RECEPTOR_UPON_Glutamate_BINDING_AND_POSTSYNAPTIC_EVENTS             | 111                | 79/70                  | 0.272692            | 0.67587496                              | 0.72398809                    |
| REACTOME_GABA_RECEPTOR_ACTIVATION                                                               | 104                | 70/61                  | 0.27745             | 0.67587496                              | 0.72398809                    |
| REACTOME_CREB_PHOSPHORYLATION_THROUGH_THE_ACTIVATION_OF_RAS                                     | 70                 | 51/44                  | 0.279722            | 0.67587496                              | 0.72398809                    |
| REACTOME_INHIBITION_OF_VOLTAGE_GATED_CACALCIUM_CHANNELS_VIA_GBETA_GAMMA_SUBUNITS                | 16                 | 12/9                   | 0.284366            | 0.67587496                              | 0.72398809                    |
| reduced long term depression                                                                    | 141                | 97/86                  | 0.289811            | 0.67587496                              | 0.72398809                    |
| REACTOME_NEUROTRANSMITTER_RECEPTOR_BINDING_AND_DOWNSTREAM_TRANSMISSION_IN_THE_POSTSYNAPTIC_CELL | 317                | 220/204                | 0.293261            | 0.67587496                              | 0.72398809                    |
| Dopaminergic_synapse                                                                            | 271                | 187/173                | 0.308275            | 0.68894792                              | 0.73799167                    |
| REACTOME_POST_NMDA_RECEPTOR_ACTIVATION_EVENTS                                                   | 102                | 73/67                  | 0.355977            | 0.71971038                              | 0.770944                      |
| REACTOME_UNBLOCKING_OF_NMDA_RECEPTOR_Glutamate_BINDING_AND_ACTIVATION                           | 52                 | 37/33                  | 0.370346            | 0.71971038                              | 0.770944                      |
| Cholinergic_synapse                                                                             | 311                | 220/208                | 0.37777             | 0.71971038                              | 0.770944                      |
| abnormal excitatory postsynaptic potential                                                      | 219                | 147/139                | 0.388845            | 0.71971038                              | 0.770944                      |



**eTable 6 (continued). Set-based association result of rare (MAF < 1%) damaging non-synonymous variant in the 79 candidate gene sets**

| Gene set                                                                         | Number of variants | allele count (Non/res) | raw P (burden test) | q value by histo method (pi0= 0.933544) | q value by BH method (pi0= 1) |
|----------------------------------------------------------------------------------|--------------------|------------------------|---------------------|-----------------------------------------|-------------------------------|
| REACTOME_GABA_SYNTHESIS_RELEASE_REUPTAKE_AND_DEGRADATION                         | 26                 | 17/16                  | 0.403326            | 0.71971038                              | 0.770944                      |
| abnormal miniature excitatory postsynaptic currents                              | 270                | 177/168                | 0.409004            | 0.71971038                              | 0.770944                      |
| reduced long term potentiation                                                   | 380                | 238/227                | 0.416342            | 0.71971038                              | 0.770944                      |
| abnormal synaptic dopamine release                                               | 32                 | 24/22                  | 0.420465            | 0.71971038                              | 0.770944                      |
| REACTOME_INWARDLY_RECTIFYING_K_CHANNELS                                          | 37                 | 27/25                  | 0.443223            | 0.71971038                              | 0.770944                      |
| abnormal inhibitory postsynaptic currents                                        | 159                | 116/111                | 0.44664             | 0.71971038                              | 0.770944                      |
| REACTOME_VOLTAGE_GATED_POTASSIUM_CHANNELS                                        | 130                | 98/95                  | 0.486099            | 0.71971038                              | 0.770944                      |
| abnormal prepulse inhibition                                                     | 42                 | 31/30                  | 0.489138            | 0.71971038                              | 0.770944                      |
| REACTOME_NOREPINEPHRINE_NEUROTRANSMITTER_RELEASE_CYCLE                           | 12                 | 4/8                    | 0.708937            | 0.71971038                              | 0.770944                      |
| REACTOME_TANDEM_PORE_DOMAIN_POTASSIUM_CHANNELS                                   | 21                 | 8/16                   | 0.722134            | 0.71971038                              | 0.770944                      |
| decreased post-tetanic potentiation                                              | 32                 | 18/20                  | 0.733359            | 0.71971038                              | 0.770944                      |
| REACTOME_GABA_B_RECEPTOR_ACTIVATION                                              | 82                 | 48/51                  | 0.735513            | 0.71971038                              | 0.770944                      |
| REACTOME_HIGHLY_CALCIUM_PERMEABLE_POSTSYNAPTIC_NICOTINIC_ACETYLCHOLINE_RECEPTORS | 38                 | 22/26                  | 0.738621            | 0.71971038                              | 0.770944                      |

**eTable 6 (continued). Set-based association result of rare (MAF < 1%) damaging non-synonymous variant in the 79 candidate gene sets**

| Gene set                                                        | Number of variants | allele count (Non/res) | raw P (burden test) | q value by histo method (pi0= 0.933544) | q value by BH method (pi0= 1) |
|-----------------------------------------------------------------|--------------------|------------------------|---------------------|-----------------------------------------|-------------------------------|
| abnormal long term potentiation                                 | 94                 | 55/58                  | 0.739286            | 0.71971038                              | 0.770944                      |
| abnormal synaptic acetylcholine release                         | 33                 | 23/27                  | 0.739834            | 0.71971038                              | 0.770944                      |
| abnormal miniature endplate potential                           | 178                | 117/134                | 0.739993            | 0.71971038                              | 0.770944                      |
| decreased paired-pulse facilitation                             | 43                 | 24/30                  | 0.741595            | 0.71971038                              | 0.770944                      |
| REACTOME_ACETYLCHOLINE_BINDING_AND_DOWNSTREAM_EVENTS            | 49                 | 28/32                  | 0.743772            | 0.71971038                              | 0.770944                      |
| REACTOME_CREB_PHOSPHORYLATION_THROUGH_THE_ACTIVATION_OF_CAMKII  | 44                 | 31/31                  | 0.744785            | 0.71971038                              | 0.770944                      |
| enhanced long term potentiation                                 | 204                | 140/145                | 0.745396            | 0.71971038                              | 0.770944                      |
| Neurotrophin_signaling_pathway                                  | 270                | 177/187                | 0.746169            | 0.71971038                              | 0.770944                      |
| REACTOME_POTASSIUM_CHANNELS                                     | 208                | 142/149                | 0.74635             | 0.71971038                              | 0.770944                      |
| enhanced paired-pulse facilitation                              | 101                | 72/71                  | 0.747037            | 0.71971038                              | 0.770944                      |
| Synaptic_vesicle_cycle                                          | 167                | 111/113                | 0.748084            | 0.71971038                              | 0.770944                      |
| REACTOME_ADENYLATE_CYCLASE_INHIBITORY_PATHWAY                   | 66                 | 36/42                  | 0.749795            | 0.71971038                              | 0.770944                      |
| abnormal miniature inhibitory postsynaptic currents             | 72                 | 42/44                  | 0.751976            | 0.71971038                              | 0.770944                      |
| Glutamatergic_synapse                                           | 395                | 270/267                | 0.753088            | 0.71971038                              | 0.770944                      |
| REACTOME_ACTIVATION_OF_KAINATE_RECEPTORS_UPON GLUTAMATE_BINDING | 57                 | 41/51                  | 0.753698            | 0.71971038                              | 0.770944                      |
| abnormal CNS synaptic transmission                              | 336                | 229/227                | 0.754792            | 0.71971038                              | 0.770944                      |

**eTable 6 (continued). Set-based association result of rare (MAF < 1%) damaging non-synonymous variant in the 79 candidate gene sets**

| Gene set                                               | Number of variants | allele count (Non/res) | raw P (burden test) | q value by histo method (pi0= 0.933544) | q value by BH method (pi0= 1) |
|--------------------------------------------------------|--------------------|------------------------|---------------------|-----------------------------------------|-------------------------------|
| GABAergic_synapse                                      | 209                | 137/135                | 0.755213            | 0.71971038                              | 0.770944                      |
| decreased neurotransmitter release                     | 86                 | 54/54                  | 0.757449            | 0.71971038                              | 0.770944                      |
| abnormal endplate potential                            | 81                 | 58/58                  | 0.758989            | 0.71971038                              | 0.770944                      |
| REACTOME_DOPAMINE_NEUROTRANSMITTER_RELEASE_CYCLE       | 17                 | 7/10                   | 0.759919            | 0.71971038                              | 0.770944                      |
| REACTOME_ACETYLCHOLINE_NEUROTRANSMITTER_RELEASE_CYCLE  | 15                 | 11/12                  | 0.762093            | 0.71971038                              | 0.770944                      |
| abnormal NMDA-mediated synaptic currents               | 28                 | 15/16                  | 0.763856            | 0.71971038                              | 0.770944                      |
| abnormal PNS synaptic transmission                     | 30                 | 15/26                  | 0.766586            | 0.71971038                              | 0.770944                      |
| abnormal glutamate-mediated receptor currents          | 34                 | 22/27                  | 0.767735            | 0.71971038                              | 0.770944                      |
| REACTOME_IONOTROPIC_ACTIVITY_OF_KAINATE_RECEPTORS      | 30                 | 19/28                  | 0.768246            | 0.71971038                              | 0.770944                      |
| abnormal neurotransmitter secretion                    | 37                 | 22/29                  | 0.768788            | 0.71971038                              | 0.770944                      |
| increased prepulse inhibition                          | 40                 | 23/28                  | 0.768811            | 0.71971038                              | 0.770944                      |
| REACTOME_PRESYNAPTIC_NICOTINIC_ACETYLCHOLINE_RECEPTORS | 42                 | 23/30                  | 0.769227            | 0.71971038                              | 0.770944                      |
| increased synaptic depression                          | 52                 | 35/36                  | 0.770944            | 0.71971038                              | 0.770944                      |

**eTable 7. Information about variants identified in the reduced NMDA-mediated synaptic current in the discovery exome study**

| CHR | POS      | REF/ALT | rsID        | Gene  | Variant  | RefGeneFeatures                                                                                                        | MAF_diss | MaxDBAltAF  | num_non | num_re | Causal | Prediction_other                 |
|-----|----------|---------|-------------|-------|----------|------------------------------------------------------------------------------------------------------------------------|----------|-------------|---------|--------|--------|----------------------------------|
| 1   | 20998491 | C/T     | rs141985868 | KIF17 | missense | KIF17:NM_001122819(15Exons):exon12:c.G2662A:p.E888K&missense;KIF17:NM_020816(15Exons):exon12:c.G2662A:p.E888K&missense | 0.003165 | 0.001134816 | 1       | 1      | Y      | A;B;C;D;E;F:0.0484:0.828:0.792   |
| 1   | 20998508 | C/T     | rs34232864  | KIF17 | missense | KIF17:NM_001122819(15Exons):exon12:c.G2645A:p.R882H&missense;KIF17:NM_020816(15Exons):exon12:c.G2645A:p.R882H&missense | 0.001582 | 0.01815706  | 1       | 0      | Y      | A;G;B;C;D;E;F:0.0494:0.825:0.796 |
| 1   | 20998598 | C/T     | rs139517726 | KIF17 | missense | KIF17:NM_001122819(15Exons):exon12:c.G2555A:p.R852H&missense;KIF17:NM_020816(15Exons):exon12:c.G2555A:p.R852H&missense | 0.001582 | 9.30E-04    | 1       | 0      | Y      | A;B;C;D;E;F:0.0484:0.828:0.792   |
| 1   | 21009211 | C/A     | NA          | KIF17 | missense | KIF17:NM_001122819(15Exons):exon11:c.G2398T:p.V800F&missense;KIF17:NM_020816(15Exons):exon11:c.G2398T:p.V800F&missense | 0.001582 | N           | 1       | 0      | Y      | A;B;C;D;E;F:0.0484:0.828:0.792   |
| 1   | 21009252 | T/G     | NA          | KIF17 | missense | KIF17:NM_001122819(15Exons):exon11:c.A2357C:p.Q786P&missense;KIF17:NM_020816(15Exons):exon11:c.A2357C:p.Q786P&missense | 0.001582 | N           | 1       | 0      | Y      | A;B;C;D;E;F:0.0484:0.828:0.792   |
|     |          |         |             |       |          |                                                                                                                        |          |             |         |        |        |                                  |

**eTable 7(continued). Information about variants identified in the reduced NMDA-mediated synaptic current in the discovery exome study**

| CHR | POS      | REF/ALT | rsID        | Gene  | Variant  | RefGeneFeatures                                                                                                        | MAF_diss | MaxDBAltAF | num_non | num_re | Causal | Prediction_other               |
|-----|----------|---------|-------------|-------|----------|------------------------------------------------------------------------------------------------------------------------|----------|------------|---------|--------|--------|--------------------------------|
| 1   | 21011440 | T/G     | rs139742596 | KIF17 | missense | KIF17:NM_001122819(15Exons):exon10:c.A2093C:p.Q698P&missense;KIF17:NM_020816(15Exons):exon10:c.A2093C:p.Q698P&missense | 0.004747 | 2.74E-04   | 2       | 1      | Y      | A;B;E;H;F;I:0.0287:0.885:0.676 |
| 1   | 21024922 | G/A     | NA          | KIF17 | stopgain | KIF17:NM_001122819(15Exons):exon6:c.C1183T:p.Q395*&stopgain;KIF17:NM_020816(15Exons):exon6:c.C1183T:p.Q395*&stopgain   | 0.001582 | N          | 1       | 0      | Y      | B;D;H;F:0.0414:0.84:0.742      |
| 1   | 21031039 | T/G     | NA          | KIF17 | missense | KIF17:NM_001122819(15Exons):exon5:c.A1024C:p.N342H&missense;KIF17:NM_020816(15Exons):exon5:c.A1024C:p.N342H&missense   | 0.001582 | N          | 0       | 1      | Y      | A;B;C;D;E;F:0.0484:0.828:0.792 |
| 1   | 21031266 | G/A     | NA          | KIF17 | missense | KIF17:NM_001122819(15Exons):exon5:c.C797T:p.S266L&missense;KIF17:NM_020816(15Exons):exon5:c.C797T:p.S266L&missense     | 0.001582 | N          | 1       | 0      | Y      | A;B;C;D;E;F:0.0484:0.828:0.792 |
| 1   | 21040020 | C/T     | NA          | KIF17 | missense | KIF17:NM_001122819(15Exons):exon3:c.G407A:p.R136Q&missense;KIF17:NM_020816(15Exons):exon3:c.G407A:p.R136Q&missense     | 0.001582 | N          | 0       | 1      | Y      | A;B;C;D;E;F:0.0484:0.828:0.792 |

**eTable 7(continued). Information about variants identified in the reduced NMDA-mediated synaptic current in the discovery exome study**

| CHR | POS          | REF/<br>ALT | rsID            | Gene      | Variant      | RefGeneFeatures                                                                                                                                                                   | MAF_<br>di<br>s | MaxD<br>BAltA<br>F | num<br>_non | num<br>_re | Cau<br>sal | Prediction<br>_other           |
|-----|--------------|-------------|-----------------|-----------|--------------|-----------------------------------------------------------------------------------------------------------------------------------------------------------------------------------|-----------------|--------------------|-------------|------------|------------|--------------------------------|
| 2   | 5028047<br>0 | G/A         | rs1997<br>01703 | NRXN<br>1 | missen<br>se | NRXN1:NM_001135659(24Exons):exon22:c.C4187T:p.T1396M&missense; NRXN1:NM_004801(22Exons):exon20:c.C3977T:p.T1326M&missense; NRXN1:NM_138735(6Exons):exon4:c.C872T:p.T291M&missense | 0.00158<br>2    | N                  | 1           | 0          | Y          | A;B;C;D;E;F:0.0484:0.828:0.792 |
| 2   | 5028047<br>7 | T/A         | rs2020<br>06815 | NRXN<br>1 | missen<br>se | NRXN1:NM_001135659(24Exons):exon22:c.A4180T:p.T1394S&missense; NRXN1:NM_004801(22Exons):exon20:c.A3970T:p.T1324S&missense; NRXN1:NM_138735(6Exons):exon4:c.A865T:p.T289S&missense | 0.00632<br>9    | 0.0014             | 4           | 0          | Y          | A;B;C;D;E;F:0.0484:0.828:0.792 |
| 2   | 5028052<br>6 | C/G         | rs2009<br>35246 | NRXN<br>1 | missen<br>se | NRXN1:NM_001135659(24Exons):exon22:c.G4131C:p.E1377D&missense; NRXN1:NM_004801(22Exons):exon20:c.G3921C:p.E1307D&missense; NRXN1:NM_138735(6Exons):exon4:c.G816C:p.E272D&missense | 0.00158<br>2    | 5.00E-<br>04       | 1           | 0          | Y          | A;B;D;E;F:0.0385:0.859:0.732   |
|     |              |             |                 |           |              |                                                                                                                                                                                   |                 |                    |             |            |            |                                |

**eTable 7(continued). Information about variants identified in the reduced NMDA-mediated synaptic current in the discovery exome study**

| CHR | POS          | REF/<br>ALT | rsID | Gene      | Variant      | RefGeneFeatures                                                                                                                                                                   | MAF_<br>di<br>s | MaxD<br>BAltA<br>F | num<br>_non | num<br>_re | Cau<br>sal | Prediction<br>_other           |
|-----|--------------|-------------|------|-----------|--------------|-----------------------------------------------------------------------------------------------------------------------------------------------------------------------------------|-----------------|--------------------|-------------|------------|------------|--------------------------------|
| 2   | 5028055<br>5 | C/T         | NA   | NRXN<br>1 | missen<br>se | NRXN1:NM_001135659(24Exons):exon22:c.G4102A:p.G1368S&missense; NRXN1:NM_004801(22Exons):exon20:c.G3892A:p.G1298S&missense; NRXN1:NM_138735(6Exons):exon4:c.G787A:p.G263S&missense | 0.00158<br>2    | N                  | 0           | 1          | Y          | A;B;C;D;E;F:0.0484:0.828:0.792 |
| 2   | 5031853<br>9 | C/T         | NA   | NRXN<br>1 | missen<br>se | NRXN1:NM_001135659(24Exons):exon20:c.G3760A:p.V1254I&missense; NRXN1:NM_004801(22Exons):exon19:c.G3640A:p.V1214I&missense; NRXN1:NM_138735(6Exons):exon3:c.G535A:p.V179I&missense | 0.00159<br>2    | N                  | 1           | 0          | Y          | A;D;E;H;I:0.0436:0.86:0.724    |
| 2   | 5046407<br>0 | T/C         | NA   | NRXN<br>1 | missen<br>se | NRXN1:NM_001135659(24Exons):exon19:c.A3523G:p.I1175V&missense; NRXN1:NM_004801(22Exons):exon18:c.A3403G:p.I1135V&missense; NRXN1:NM_138735(6Exons):exon2:c.A298G:p.I100V&missense | 0.00158<br>2    | N                  | 1           | 0          | Y          | A;B;C;D;E;F:0.0484:0.828:0.792 |

**eTable 7(continued). Information about variants identified in the reduced NMDA-mediated synaptic current in the discovery exome study**

| CHR | POS          | REF/<br>ALT | rsID            | Gene      | Variant      | RefGeneFeatures                                                                                                        | MAF_<br>di<br>s | MaxD<br>BAltA<br>F | num<br>_non | num<br>_re | Cau<br>sal | Prediction<br>_other           |
|-----|--------------|-------------|-----------------|-----------|--------------|------------------------------------------------------------------------------------------------------------------------|-----------------|--------------------|-------------|------------|------------|--------------------------------|
| 2   | 5073372<br>0 | G/T         | NA              | NRXN<br>1 | missen<br>se | NRXN1:NM_001135659(24Exons):exon14:c.C2530A:p.L844I&missense;NRXN1:NM_004801(22Exons):exon13:c.C2410A:p.L804I&missense | 0.00316<br>5    | N                  | 2           | 0          | Y          | A;B;C;D;E;F:0.0484:0.828:0.792 |
| 2   | 5075845<br>1 | A/G         | NA              | NRXN<br>1 | missen<br>se | NRXN1:NM_001135659(24Exons):exon12:c.T2381C:p.I794T&missense;NRXN1:NM_004801(22Exons):exon11:c.T2261C:p.I754T&missense | 0.00158<br>2    | N                  | 1           | 0          | Y          | A;B;C;D;E;F:0.0484:0.828:0.792 |
| 2   | 5084716<br>8 | G/C         | rs1920<br>69355 | NRXN<br>1 | missen<br>se | NRXN1:NM_001135659(24Exons):exon9:c.C1432G:p.L478V&missense;NRXN1:NM_004801(22Exons):exon8:c.C1312G:p.L438V&missense   | 0.00158<br>2    | 5.00E-<br>04       | 0           | 1          | Y          | A;B;C;D;E;F:0.0484:0.828:0.792 |
| 2   | 5125355<br>9 | T/C         | NA              | NRXN<br>1 | missen<br>se | NRXN1:NM_004801(22Exons):intronic2;NRXN1:NM_001135659(24Exons):exon3:c.A821G:p.N274S&missense                          | 0.00159<br>2    | N                  | 0           | 1          | Y          | B;J;E;I:0.0312:0.928:0.884     |



**eTable 7(continued). Information about variants identified in the reduced NMDA-mediated synaptic current in the discovery exome study**

| CHR | POS      | REF/ALT | rsID        | Gene  | Variant  | RefGeneFeatures                                                                                                    | MAF_diss | MaxDBAltAF | num_non | num_re | Causal | Prediction_other               |
|-----|----------|---------|-------------|-------|----------|--------------------------------------------------------------------------------------------------------------------|----------|------------|---------|--------|--------|--------------------------------|
| 2   | 51254963 | A/T     | NA          | NRXN1 | missense | NRXN1:NM_001135659(24Exons):exon2:c.T449A:p.F150Y&missense;NRXN1:NM_004801(22Exons):exon2:c.T449A:p.F150Y&missense | 0.001582 | N          | 0       | 1      | Y      | A;B;C;D;E;F:0.0484:0.828:0.792 |
| 2   | 51255161 | G/T     | NA          | NRXN1 | missense | NRXN1:NM_001135659(24Exons):exon2:c.C251A:p.T84K&missense;NRXN1:NM_004801(22Exons):exon2:c.C251A:p.T84K&missense   | 0.001582 | N          | 1       | 0      | Y      | A;D;E;F:0.0413:0.843:0.755     |
| 6   | 1.23E+08 | A/T     | NA          | FABP7 | missense | FABP7:NM_001446(4Exons):exon1:c.A1T:p.M1L&missense                                                                 | 0.001582 | N          | 0       | 1      | Y      | A;D;E;F:0.0413:0.843:0.755     |
| 6   | 1.23E+08 | G/C     | NA          | FABP7 | missense | FABP7:NM_001446(4Exons):exon2:c.G140C:p.G47A&missense                                                              | 0.001582 | N          | 1       | 0      | Y      | A;B;C;D;E;F:0.0484:0.828:0.792 |
| 9   | 90266526 | G/A     | rs199940257 | DAPK1 | missense | DAPK1:NM_004938(26Exons):exon17:c.G1711A:p.D571N&missense                                                          | 0.003165 | 4.74E-04   | 2       | 0      | Y      | A;D;E;F:0.0413:0.843:0.755     |
| 9   | 90272992 | G/A     | rs117269616 | DAPK1 | missense | DAPK1:NM_004938(26Exons):exon18:c.G1873A:p.V625M&missense                                                          | 0.001582 | 8.68E-04   | 0       | 1      | Y      | A;B;C;D;E;F:0.0484:0.828:0.792 |
| 9   | 90321249 | T/C     | NA          | DAPK1 | missense | DAPK1:NM_004938(26Exons):exon26:c.T3263C:p.M1088T&missense                                                         | 0.001582 | N          | 0       | 1      | Y      | A;B;C;D;E;F:0.0484:0.828:0.792 |

**eTable 7(continued). Information about variants identified in the reduced NMDA-mediated synaptic current in the discovery exome study**

| CHR | POS     | REF/ALT | rsID | Gene  | Variant  | RefGeneFeatures                                                                                                                                                                                                                                                                     | MAF_diss | MaxDBAltAF | num_non | num_re | Causal | Prediction_other               |
|-----|---------|---------|------|-------|----------|-------------------------------------------------------------------------------------------------------------------------------------------------------------------------------------------------------------------------------------------------------------------------------------|----------|------------|---------|--------|--------|--------------------------------|
| 9   | 1.4E+08 | G/A     | NA   | GRIN1 | missense | GRIN1:NM_021569(19Exons):exon1:c.G14A:p.R5H&missense;GRIN1:NM_007327(20Exons):exon1:c.G14A:p.R5H&missense;GRIN1:NM_001185090(21Exons):exon1:c.G14A:p.R5H&missense;GRIN1:NM_001185091(20Exons):exon1:c.G14A:p.R5H&missense;GRIN1:NM_000832(19Exons):exon1:c.G14A:p.R5H&missense      | 0.001582 | N          | 1       | 0      | Y      | A;G;B;D;H;F:0.0369:0.864:0.727 |
| 9   | 1.4E+08 | T/C     | NA   | GRIN1 | missense | GRIN1:NM_021569(19Exons):exon1:c.T86C:p.I29T&missense;GRIN1:NM_007327(20Exons):exon1:c.T86C:p.I29T&missense;GRIN1:NM_001185090(21Exons):exon1:c.T86C:p.I29T&missense;GRIN1:NM_001185091(20Exons):exon1:c.T86C:p.I29T&missense;GRIN1:NM_000832(19Exons):exon1:c.T86C:p.I29T&missense | 0.001582 | N          | 0       | 1      | Y      | A;B;C;D;H;F:0.0455:0.832:0.786 |

**eTable 7(continued). Information about variants identified in the reduced NMDA-mediated synaptic current in the discovery exome study**

| CHR | POS     | REF/<br>ALT | rsID | Gene  | Variant  | RefGeneFeatures                                                                                                                                                                                                                                                                                   | MAF_<br>di<br>s | MaxD<br>BAltA<br>F | num<br>_non | num<br>_re | Cau<br>sal | Prediction<br>_other               |
|-----|---------|-------------|------|-------|----------|---------------------------------------------------------------------------------------------------------------------------------------------------------------------------------------------------------------------------------------------------------------------------------------------------|-----------------|--------------------|-------------|------------|------------|------------------------------------|
| 9   | 1.4E+08 | C/G         | NA   | GRIN1 | missense | GRIN1:NM_021569(19Exons):exon5:c.C701G:p.A234G&missense;GRIN1:NM_007327(20Exons):exon5:c.C701G:p.A234G&missense;GRIN1:NM_01185090(21Exons):exon6:c.C764G:p.A255G&missense;GRIN1:NM_01185091(20Exons):exon6:c.C764G:p.A255G&missense;GRIN1:NM_000832(19Exons):exon5:c.C701G:p.A234G&missense       | 0.001582        | N                  | 1           | 0          | Y          | A;K;G;B;C;D;E;F:0.0405:0.851:0.764 |
| 9   | 1.4E+08 | T/C         | NA   | GRIN1 | missense | LRRRC26:NM_001013653(2Exons):downstream+966;GRIN1:NM_021569(19Exons):3UTR+266;GRIN1:NM_007327(20Exons):3UTR+266;GRIN1:NM_01185090(21Exons):exon21:c.T2783C:p.I928T&missense;GRIN1:NM_01185091(20Exons):exon20:c.T2672C:p.I891T&missense;GRIN1:NM_000832(19Exons):exon19:c.T2609C:p.I870T&missense | 0.001582        | N                  | 1           | 0          | Y          | A;D;F:0.039:0.846:0.75             |

**eTable 7(continued). Information about variants identified in the reduced NMDA-mediated synaptic current in the discovery exome study**

| CHR | POS      | REF/ALT | rsID        | Gene  | Variant  | RefGeneFeatures                                                                                                    | MAF_diss | MaxDBAltAF  | num_non | num_re | Causal | Prediction_other                     |
|-----|----------|---------|-------------|-------|----------|--------------------------------------------------------------------------------------------------------------------|----------|-------------|---------|--------|--------|--------------------------------------|
| 11  | 64428398 | C/T     | NA          | NRXN2 | missense | NRXN2:NM_138732(20Exons):exon9:c.G1919A:p.R640Q&missense;NRXN2:NM_015080(23Exons):exon10:c.G2012A:p.R671Q&missense | 0.001582 | N           | 1       | 0      | Y      | A;G;B;C;J;D;E;H;F:0.0283:0.944:0.891 |
| 11  | 64428458 | C/A     | NA          | NRXN2 | missense | NRXN2:NM_138732(20Exons):exon9:c.G1859T:p.R620L&missense;NRXN2:NM_015080(23Exons):exon10:c.G1952T:p.R651L&missense | 0.001582 | N           | 1       | 0      | Y      | A;K;G;B;C;D;E;H:0.0491:0.827:0.776   |
| 11  | 64434956 | G/A     | rs201258323 | NRXN2 | missense | NRXN2:NM_138732(20Exons):exon8:c.C1471T:p.R491C&missense;NRXN2:NM_015080(23Exons):exon9:c.C1564T:p.R522C&missense  | 0.001582 | 5.00E-04    | 0       | 1      | Y      | A;B;C;D;E;F:0.484:0.828:0.792        |
| 11  | 64434997 | C/T     | rs140588352 | NRXN2 | missense | NRXN2:NM_138732(20Exons):exon8:c.G1430A:p.R477H&missense;NRXN2:NM_015080(23Exons):exon9:c.G1523A:p.R508H&missense  | 0.001582 | 0.006815084 | 1       | 0      | Y      | G;B;C;D;H:0.0541:0.817:0.783         |
| 11  | 64435078 | T/A     | rs139150995 | NRXN2 | missense | NRXN2:NM_138732(20Exons):exon8:c.A1349T:p.D450V&missense;NRXN2:NM_015080(23Exons):exon9:c.A1442T:p.D481V&missense  | 0.003165 | 2.20E-04    | 1       | 1      | Y      | K;B;J;D:0.028:0.942:0.879            |

**eTable 7(continued). Information about variants identified in the reduced NMDA-mediated synaptic current in the discovery exome study**

| CHR | POS          | REF/<br>ALT | rsID | Gene      | Variant      | RefGeneFeatures                                                                                                                                                                                                                                                                                   | MAF_<br>di<br>s | MaxD<br>BAltA<br>F | num<br>_non | num<br>_re | Cau<br>sal | Prediction<br>_other          |
|-----|--------------|-------------|------|-----------|--------------|---------------------------------------------------------------------------------------------------------------------------------------------------------------------------------------------------------------------------------------------------------------------------------------------------|-----------------|--------------------|-------------|------------|------------|-------------------------------|
| 14  | 7917590<br>5 | A/G         | NA   | NRXN<br>3 | missen<br>se | NRXN3:NR_073547(21Exons):ncRNA;NRXN3:NM_004796(17Exons):exon4:c.A448G:p.M150V&missense                                                                                                                                                                                                            | 0.00158<br>2    | N                  | 1           | 0          | Y          | B;C;D;F:0.0435:0.843:0.771    |
| 14  | 7942369<br>8 | G/A         | NA   | NRXN<br>3 | missen<br>se | NRXN3:NR_073547(21Exons):ncRNA;NRXN3:NM_004796(17Exons):exon8:c.G1270A:p.A424T&missense                                                                                                                                                                                                           | 0.00158<br>2    | N                  | 0           | 1          | Y          | B;D;H;F:0.0414:0.84:0.742     |
| 14  | 7943240<br>7 | A/G         | NA   | NRXN<br>3 | missen<br>se | NRXN3:NR_073547(21Exons):ncRNA;NRXN3:NM_004796(17Exons):exon9:c.A1316G:p.N439S&missense                                                                                                                                                                                                           | 0.00158<br>2    | N                  | 0           | 1          | Y          | B;D;H;F:0.0414:0.84:0.742     |
| 14  | 8016415<br>3 | T/G         | NA   | NRXN<br>3 | missen<br>se | NRXN3:NR_073546(8Exons):ncRNA;NRXN3:NR_073547(21Exons):ncRNA;NRXN3:NM_001105250(7Exons):exon5:c.T872G:p.V291G&missense;NRXN3:NM_138970(6Exons):exon4:c.T782G:p.V261G&missense;NRXN3:NM_001272020(6Exons):exon4:c.T782G:p.V261G&missense;NRXN3:NM_004796(17Exons):exon15:c.T2678G:p.V893G&missense | 0.00158<br>2    | N                  | 1           | 0          | Y          | G;B;C;D;E;F:0.447:0.839:0.772 |

**eTable 7(continued). Information about variants identified in the reduced NMDA-mediated synaptic current in the discovery exome study**

| CHR | POS          | REF/<br>ALT | rsID            | Gene       | Variant      | RefGeneFeatures                                                                                                                                                                                                                                                | MAF_<br>di<br>s | MaxD<br>BAltA<br>F | num<br>_non | num<br>_re | Cau<br>sal | Prediction<br>_other                |
|-----|--------------|-------------|-----------------|------------|--------------|----------------------------------------------------------------------------------------------------------------------------------------------------------------------------------------------------------------------------------------------------------------|-----------------|--------------------|-------------|------------|------------|-------------------------------------|
| 14  | 8032758<br>3 | A/T         | NA              | NRXN<br>3  | missen<br>se | NRXN3:NR_073546(8Exons):ncRNA<br>;NRXN3:NR_073547(21Exons):ncRN<br>A;NRXN3:NM_001105250(7Exons):i<br>ntronic6;NRXN3:NM_138970(6Exon<br>s):intronic5;NRXN3:NM_004796(17E<br>xons):intronic16;NRXN3:NM_00127<br>2020(6Exons):exon6:c.A1190T;p.D39<br>7V&missense | 0.00158<br>2    | N                  | 1           | 0          | Y          | G;B;J;D;E;H;F:0.<br>0311:0.938:0.89 |
| 16  | 9857416      | A/T         | NA              | GRIN2<br>A | missen<br>se | GRIN2A:NM_001134408(14Exons):i<br>ntronic13;GRIN2A:NM_000833(14E<br>xons):exon14:c.T3985A:p.F1329I&mi<br>ssense;GRIN2A:NM_001134407(13E<br>xons):exon13:c.T3985A:p.F1329I&mi<br>ssense                                                                         | 0.00158<br>2    | N                  | 1           | 0          | Y          | B;C;D;F:0.0435:0<br>.843:0.771      |
| 16  | 9858765      | T/C         | rs1830<br>29507 | GRIN2<br>A | missen<br>se | GRIN2A:NM_001134408(14Exons):e<br>xon13:c.A2636G:p.K879R&missense;<br>GRIN2A:NM_000833(14Exons):exon<br>14:c.A2636G:p.K879R&missense;GR<br>IN2A:NM_001134407(13Exons):exon<br>13:c.A2636G:p.K879R&missense                                                     | 0.00158<br>2    | 0.0014             | 0           | 1          | Y          | G;B;C;D;E;F:0.0<br>447:0.839:0.772  |

**eTable 7(continued). Information about variants identified in the reduced NMDA-mediated synaptic current in the discovery exome study**

| CHR | POS     | REF/<br>ALT | rsID            | Gene       | Variant      | RefGeneFeatures                                                                                                                                                                                            | MAF_<br>di<br>s | MaxD<br>BAltA<br>F | num<br>_non | num<br>_re | Cau<br>sal | Prediction<br>_other            |
|-----|---------|-------------|-----------------|------------|--------------|------------------------------------------------------------------------------------------------------------------------------------------------------------------------------------------------------------|-----------------|--------------------|-------------|------------|------------|---------------------------------|
| 16  | 9858774 | A/G         | rs1997<br>84503 | GRIN2<br>A | missen<br>se | GRIN2A:NM_001134408(14Exons):e<br>xon13:c.T2627C:p.I876T&missense;<br>GRIN2A:NM_000833(14Exons):exon<br>14:c.T2627C:p.I876T&missense;GRI<br>N2A:NM_001134407(13Exons):exon<br>13:c.T2627C:p.I876T&missense | 0.00474<br>7    | 5.00E-<br>04       | 2           | 1          | Y          | B;C;D;F:0.0435:0<br>.843:0.771  |
| 16  | 9862818 | C/A         | NA              | GRIN2<br>A | missen<br>se | GRIN2A:NM_001134408(14Exons):e<br>xon12:c.G2485T:p.A829S&missense;<br>GRIN2A:NM_000833(14Exons):exon<br>13:c.G2485T:p.A829S&missense;GRI<br>N2A:NM_001134407(13Exons):exon<br>12:c.G2485T:p.A829S&missense | 0.00158<br>2    | N                  | 1           | 0          | Y          | B;C;D;F:0.0435:0<br>.843:0.771  |
| 16  | 9892139 | C/G         | rs7639<br>2464  | GRIN2<br>A | missen<br>se | GRIN2A:NM_001134408(14Exons):e<br>xon11:c.G2351C:p.G784A&missense;<br>GRIN2A:NM_000833(14Exons):exon<br>12:c.G2351C:p.G784A&missense;GR<br>IN2A:NM_001134407(13Exons):exon<br>11:c.G2351C:p.G784A&missense | 0.00158<br>2    | 5.00E-<br>04       | 1           | 0          | Y          | G;B;J;E;F:0.0313<br>:0.934:0.89 |
|     |         |             |                 |            |              |                                                                                                                                                                                                            |                 |                    |             |            |            |                                 |

**eTable 7(continued). Information about variants identified in the reduced NMDA-mediated synaptic current in the discovery exome study**

| CHR | POS      | REF/ALT | rsID | Gene   | Variant  | RefGeneFeatures                                                                                                | MAF_dis  | MaxDBAltAF | num_non | num_re | Causal | Prediction_other                    |
|-----|----------|---------|------|--------|----------|----------------------------------------------------------------------------------------------------------------|----------|------------|---------|--------|--------|-------------------------------------|
| 19  | 45975932 | G/A     | NA   | FOSB   | missense | FOSB:NM_006732(4Exons):exon4:c.G679A:p.E227K&missense;FOSB:NM_001114171(3Exons):exon3:c.G571A:p.E191K&missense | 0.001582 | N          | 1       | 0      | Y      | A;D;E;F:0.0413:0.843:0.755          |
| 22  | 51133230 | C/T     | NA   | SHANK3 | missense | SHANK3:NM_033517(22Exons):exon10:c.C1058T:p.A353V&missense                                                     | 0.001582 | N          | 1       | 0      | Y      | A;B;C;J;D;E;H;F;I:0.0247:0.949:0.88 |
| 22  | 51133409 | C/T     | NA   | SHANK3 | missense | SHANK3:NM_033517(22Exons):exon10:c.C1237T:p.R413W&missense                                                     | 0.003165 | N          | 1       | 1      | Y      | A;C;D:0.0555:0.805:0.804            |

NOTE: MAF\_dis: MAF (in our discovery sample); num\_non: Count in Non-responder; num\_re: Count in Responder; Causal:

IsDiseaseCausal\_predicted\_by\_KGGSeq; Prediction\_other: Prediction\_by\_other\_deleteriousness\_prediction\_tools; In the last column, prediction tools are labeled with letters: A-SIFT\_score; B-MutationTaster\_score; C- MutationAssessor\_score; D-CADD\_raw; E-GERP++\_NR; F-phyloP100way\_vertebrate; G-Polyphen2\_HVAR\_score; H-GERP++\_RS; I-SiPhy\_29way\_logOdds; J-FATHMM\_score; K-Polyphen2\_HDIV\_score



**eTable 8. Information about variants identified in the reduced AMPA-mediated synaptic current in the discovery exome study**

| CHR | POS      | REF/ALT | rsID        | Gene  | Variant  | RefGeneFeatures                                                                                                                                                                   | MAF_diss | MaxDBAltAF | num_non | num_re | Causal | Prediction_other               |
|-----|----------|---------|-------------|-------|----------|-----------------------------------------------------------------------------------------------------------------------------------------------------------------------------------|----------|------------|---------|--------|--------|--------------------------------|
| 1   | 2.25E+08 | C/T     | ID15209     | CNIH3 | stopgain | CNIH3:NM_152495(6Exons):exon3:c.C193T:p.R65*&stopgain                                                                                                                             | 0.001587 | N          | 0       | 1      | Y      | A;D;E;F:0.0413:0.843:0.755     |
| 2   | 50280470 | G/A     | rs199701703 | NRXN1 | missense | NRXN1:NM_001135659(24Exons):exon22:c.C4187T:p.T1396M&missense; NRXN1:NM_004801(22Exons):exon20:c.C3977T:p.T1326M&missense; NRXN1:NM_138735(6Exons):exon4:c.C872T:p.T291M&missense | 0.001582 | N          | 1       | 0      | Y      | A;B;C;D;E;F:0.0484:0.828:0.792 |
| 2   | 50280477 | T/A     | rs202006815 | NRXN1 | missense | NRXN1:NM_001135659(24Exons):exon22:c.A4180T:p.T1394S&missense; NRXN1:NM_004801(22Exons):exon20:c.A3970T:p.T1324S&missense; NRXN1:NM_138735(6Exons):exon4:c.A865T:p.T289S&missense | 0.006329 | 0.0014     | 4       | 0      | Y      | A;B;C;D;E;F:0.0484:0.828:0.792 |
| 2   | 50280526 | C/G     | rs200935246 | NRXN1 | missense | NRXN1:NM_001135659(24Exons):exon22:c.G4131C:p.E1377D&missense; NRXN1:NM_004801(22Exons):exon20:c.G3921C:p.E1307D&missense; NRXN1:NM_138735(6Exons):exon4:c.G816C:p.E272D&missense | 0.001582 | 5.00E-04   | 1       | 0      | Y      | A;B;D;E;F:0.0385:0.859:0.732   |

**Table 8 (continued). Information about variants identified in the reduced AMPA-mediated synaptic current in the discovery exome study**

| CHR | POS      | REF/ALT | rsID    | Gene  | Variant  | RefGeneFeatures                                                                                                                                                                   | MAF_diss | MaxDBAltAF | num_non | num_re | Causal | Prediction_other               |
|-----|----------|---------|---------|-------|----------|-----------------------------------------------------------------------------------------------------------------------------------------------------------------------------------|----------|------------|---------|--------|--------|--------------------------------|
| 2   | 50280555 | C/T     | ID19527 | NRXN1 | missense | NRXN1:NM_001135659(24Exons):exon22:c.G4102A:p.G1368S&missense; NRXN1:NM_004801(22Exons):exon20:c.G3892A:p.G1298S&missense; NRXN1:NM_138735(6Exons):exon4:c.G787A:p.G263S&missense | 0.001582 | N          | 0       | 1      | Y      | A;B;C;D;E;F:0.0484:0.828:0.792 |
| 2   | 50318539 | C/T     | ID19528 | NRXN1 | missense | NRXN1:NM_001135659(24Exons):exon20:c.G3760A:p.V1254I&missense; NRXN1:NM_004801(22Exons):exon19:c.G3640A:p.V1214I&missense; NRXN1:NM_138735(6Exons):exon3:c.G535A:p.V179I&missense | 0.001592 | N          | 1       | 0      | Y      | A;D;E;H;I:0.0436:0.86:0.724    |
| 2   | 50464070 | T/C     | ID19529 | NRXN1 | missense | NRXN1:NM_001135659(24Exons):exon19:c.A3523G:p.I1175V&missense; NRXN1:NM_004801(22Exons):exon18:c.A3403G:p.I1135V&missense; NRXN1:NM_138735(6Exons):exon2:c.A298G:p.I100V&missense | 0.001582 | N          | 1       | 0      | Y      | A;B;C;D;E;F:0.0484:0.828:0.792 |

**eTable 8 (continued). Information about variants identified in the reduced AMPA-mediated synaptic current in the discovery exome study**

| CHR | POS      | REF/ALT | rsID        | Gene  | Variant  | RefGeneFeatures                                                                                                        | MAF_diss | MaxDBAltAF | num_non | num_re | Causal | Prediction_other               |
|-----|----------|---------|-------------|-------|----------|------------------------------------------------------------------------------------------------------------------------|----------|------------|---------|--------|--------|--------------------------------|
| 2   | 50733720 | G/T     | ID19538     | NRXN1 | missense | NRXN1:NM_001135659(24Exons):exon14:c.C2530A:p.L844I&missense;NRXN1:NM_004801(22Exons):exon13:c.C2410A:p.L804I&missense | 0.003165 | N          | 2       | 0      | Y      | A;B;C;D;E;F:0.0484:0.828:0.792 |
| 2   | 50758451 | A/G     | ID19539     | NRXN1 | missense | NRXN1:NM_001135659(24Exons):exon12:c.T2381C:p.I794T&missense;NRXN1:NM_004801(22Exons):exon11:c.T2261C:p.I754T&missense | 0.001582 | N          | 1       | 0      | Y      | A;B;C;D;E;F:0.0484:0.828:0.792 |
| 2   | 50847168 | G/C     | rs192069355 | NRXN1 | missense | NRXN1:NM_001135659(24Exons):exon9:c.C1432G:p.L478V&missense;NRXN1:NM_004801(22Exons):exon8:c.C1312G:p.L438V&missense   | 0.001582 | 5.00E-04   | 0       | 1      | Y      | A;B;C;D;E;F:0.0484:0.828:0.792 |
| 2   | 51253559 | T/C     | ID19549     | NRXN1 | missense | NRXN1:NM_004801(22Exons):intron1c2;NRXN1:NM_001135659(24Exons):exon3:c.A821G:p.N274S&missense                          | 0.001592 | N          | 0       | 1      | Y      | B;J;E;I:0.0312:0.928:0.884     |
| 2   | 51254963 | A/T     | ID19550     | NRXN1 | missense | NRXN1:NM_001135659(24Exons):exon2:c.T449A:p.F150Y&missense;NRXN1:NM_004801(22Exons):exon2:c.T449A:p.F150Y&missense     | 0.001582 | N          | 0       | 1      | Y      | A;B;C;D;E;F:0.0484:0.828:0.792 |

**eTable 8 (continued). Information about variants identified in the reduced AMPA-mediated synaptic current in the discovery exome study**

| CHR | POS      | REF/ALT | rsID    | Gene  | Variant  | RefGeneFeatures                                                                                                        | MAF_diss | MaxDBAltAF | num_non | num_re | Causal | Prediction_other               |
|-----|----------|---------|---------|-------|----------|------------------------------------------------------------------------------------------------------------------------|----------|------------|---------|--------|--------|--------------------------------|
| 2   | 51255161 | G/T     | ID19552 | NRXN1 | missense | NRXN1:NM_001135659(24Exons):exon2:c.C251A:p.T84K&missense;NRXN1:NM_004801(22Exons):exon2:c.C251A:p.T84K&missense       | 0.001582 | N          | 1       | 0      | Y      | A;D;E;F:0.0413:0.843:0.755     |
| 3   | 1.24E+08 | G/C     | ID35831 | KALRN | missense | KALRN:NM_001024660(60Exons):exon12:c.G2158C:p.E720Q&missense;KALRN:NM_003947(34Exons):exon12:c.G2158C:p.E720Q&missense | 0.001582 | N          | 1       | 0      | Y      | D;E;F:0.0344:0.859:0.721       |
| 3   | 1.24E+08 | A/C     | ID35832 | KALRN | missense | KALRN:NM_001024660(60Exons):exon13:c.A2198C:p.H733P&missense;KALRN:NM_003947(34Exons):exon13:c.A2198C:p.H733P&missense | 0.001582 | N          | 1       | 0      | Y      | A;B;C;D;E;F:0.0484:0.828:0.792 |
| 3   | 1.24E+08 | G/A     | ID35837 | KALRN | missense | KALRN:NM_007064(27Exons):exon2:c.G299A:p.R100Q&missense;KALRN:NM_001024660(60Exons):exon35:c.G5390A:p.R1797Q&missense  | 0.001582 | 1.16E-04   | 1       | 0      | Y      | B;C;D;F:0.0435:0.843:0.771     |
| 3   | 1.24E+08 | T/C     | ID35840 | KALRN | missense | KALRN:NM_007064(27Exons):exon6:c.T722C:p.V241A&missense;KALRN:NM_001024660(60Exons):exon39:c.T5813C:p.V1938A&missense  | 0.001582 | N          | 1       | 0      | Y      | A;B;C;D;E;F:0.0484:0.828:0.792 |

**eTable 8 (continued). Information about variants identified in the reduced AMPA-mediated synaptic current in the discovery exome study**

| CHR | POS      | REF/<br>ALT | rsID            | Gene    | Variante | RefGeneFeatures                                                                                                                                                                                                                                                                                                                                                                                         | MAF_<br>di<br>s | MaxD<br>BAltA<br>F | num_<br>non | num_<br>re | Cau<br>sal | Prediction_<br>other               |
|-----|----------|-------------|-----------------|---------|----------|---------------------------------------------------------------------------------------------------------------------------------------------------------------------------------------------------------------------------------------------------------------------------------------------------------------------------------------------------------------------------------------------------------|-----------------|--------------------|-------------|------------|------------|------------------------------------|
| 3   | 1.24E+08 | C/T         | rs1437<br>16563 | KALRN   | missense | KALRN:NM_007064(27Exons):exon16:c.C2054T:p.A685V&missense;KALRN:NM_001024660(60Exons):exon49:c.C7145T:p.A2382V&missense                                                                                                                                                                                                                                                                                 | 0.003165        | .                  | 2           | 0          | Y          | A;K;B;J;E;H;F:0.0284:0.943:0.887   |
| 5   | 1.53E+08 | C/G         | ID5202<br>6     | GRIA1   | missense | GRIA1:NR_047578(14Exons):ncRNA;GRIA1:NM_001258023(16Exons):5UTR-112;GRIA1:NM_001258020(17Exons):5UTR-153052;GRIA1:NM_001258021(16Exons):exon2:c.C125G:p.P42R&missense;GRIA1:NM_001258022(16Exons):exon2:c.C125G:p.P42R&missense;GRIA1:NM_001114183(16Exons):exon2:c.C95G:p.P32R&missense;GRIA1:NM_001258019(15Exons):exon2:c.C95G:p.P32R&missense;GRIA1:NM_000827(16Exons):exon2:c.C95G:p.P32R&missense | 0.001582        | N                  | 1           | 0          | Y          | A;G;B;C;D;E;H;F;I:0.047:0.83:0.789 |
| 7   | 31378294 | C/T         | ID6292<br>6     | NEUROD6 | missense | NEUROD6:NM_022728(2Exons):exon2:c.G589A:p.A197T&missense                                                                                                                                                                                                                                                                                                                                                | 0.001582        | N                  | 1           | 0          | Y          | LRT_score;J;E:0.0245:0.939:0.867   |

**eTable 8 (continued). Information about variants identified in the reduced AMPA-mediated synaptic current in the discovery exome study**

| CHR | POS      | REF/<br>ALT | rsID            | Gene        | Variant      | RefGeneFeatures                                                                                                                                                                                                                                       | MAF_<br>di<br>s | MaxD<br>BAltA<br>F | num_<br>non | num_<br>re | Cau<br>sal | Prediction_<br>other                         |
|-----|----------|-------------|-----------------|-------------|--------------|-------------------------------------------------------------------------------------------------------------------------------------------------------------------------------------------------------------------------------------------------------|-----------------|--------------------|-------------|------------|------------|----------------------------------------------|
| 7   | 31378651 | C/T         | rs1808<br>39756 | NEUR<br>OD6 | missens<br>e | NEUROD6:NM_022728(2Exons):exo<br>n2:c.G232A:p.G78S&missense                                                                                                                                                                                           | 0.00158<br>2    | 5.00E-<br>04       | 0           | 1          | Y          | A;G;B;C;J;D;E;H<br>;F:0.0283:0.944:0.<br>891 |
| 7   | 31378712 | C/G         | ID6292<br>7     | NEUR<br>OD6 | missens<br>e | NEUROD6:NM_022728(2Exons):exo<br>n2:c.G171C:p.E57D&missense                                                                                                                                                                                           | 0.00158<br>7    | N                  | 0           | 1          | Y          | A;G;B;C;J;D;E;H<br>;F:0.0283:0.944:0.<br>891 |
| 8   | 1.19E+08 | G/A         | rs1888<br>59975 | EXT1        | missens<br>e | EXT1:NM_000127(11Exons):exon6:c.<br>C1457T:p.A486V&missense                                                                                                                                                                                           | 0.00316<br>5    | 0.0018             | 2           | 0          | Y          | A;G;B;C;J;D;E;H<br>;F:0.0283:0.944:0.<br>891 |
| 8   | 1.19E+08 | C/A         | ID7420<br>2     | EXT1        | missens<br>e | EXT1:NM_000127(11Exons):exon1:c.<br>G284T:p.G95V&missense                                                                                                                                                                                             | 0.00158<br>2    | N                  | 0           | 1          | Y          | A;G;B;C;J;D;E;H<br>;F:0.0283:0.944:0.<br>891 |
| 9   | 1.4E+08  | G/A         | ID8339<br>5     | GRIN1       | missens<br>e | GRIN1:NM_021569(19Exons):exon1:<br>c.G14A:p.R5H&missense;GRIN1:NM<br>_007327(20Exons):exon1:c.G14A:p.R<br>5H&missense;GRIN1:NM_001185090<br>(21Exons):exon1:c.G14A:p.R5H&miss<br>ense;GRIN1:NM_001185091(20Exons<br>):exon1:c.G14A:p.R5H&missense;GRI | 0.00158<br>2    | N                  | 1           | 0          | Y          | A;G;B;D;H;F:0.0<br>369:0.864:0.727           |

|  |  |  |  |  |  |                                                   |  |  |  |  |  |  |
|--|--|--|--|--|--|---------------------------------------------------|--|--|--|--|--|--|
|  |  |  |  |  |  | N1:NM_000832(19Exons):exon1:c.G14A:p.R5H&missense |  |  |  |  |  |  |
|--|--|--|--|--|--|---------------------------------------------------|--|--|--|--|--|--|

**Table 8 (continued). Information about variants identified in the reduced AMPA-mediated synaptic current in the discovery exome study**

| CHR | POS     | REF/ALT | rsID    | Gene  | Variant  | RefGeneFeatures                                                                                                                                                                                                                                                                               | MAF_diss | MaxDBAltAF | num_non | num_re | Causal | Prediction_other                   |
|-----|---------|---------|---------|-------|----------|-----------------------------------------------------------------------------------------------------------------------------------------------------------------------------------------------------------------------------------------------------------------------------------------------|----------|------------|---------|--------|--------|------------------------------------|
| 9   | 1.4E+08 | T/C     | ID83396 | GRIN1 | missense | GRIN1:NM_021569(19Exons):exon1:c.T86C:p.I29T&missense;GRIN1:NM_007327(20Exons):exon1:c.T86C:p.I29T&missense;GRIN1:NM_001185090(21Exons):exon1:c.T86C:p.I29T&missense;GRIN1:NM_001185091(20Exons):exon1:c.T86C:p.I29T&missense;GRIN1:NM_000832(19Exons):exon1:c.T86C:p.I29T&missense           | 0.001582 | N          | 0       | 1      | Y      | A;B;C;D;H;F:0.0455:0.832:0.786     |
| 9   | 1.4E+08 | C/G     | ID83401 | GRIN1 | missense | GRIN1:NM_021569(19Exons):exon5:c.C701G:p.A234G&missense;GRIN1:NM_007327(20Exons):exon5:c.C701G:p.A234G&missense;GRIN1:NM_001185090(21Exons):exon6:c.C764G:p.A255G&missense;GRIN1:NM_001185091(20Exons):exon6:c.C764G:p.A255G&missense;GRIN1:NM_000832(19Exons):exon5:c.C701G:p.A234G&missense | 0.001582 | N          | 1       | 0      | Y      | A;K;G;B;C;D;E;F:0.0405:0.851:0.764 |

**eTable 8 (continued). Information about variants identified in the reduced AMPA-mediated synaptic current in the discovery exome study**

| CHR | POS      | REF/ALT | rsID    | Gene  | Variant  | RefGeneFeatures                                                                                                                                                                                                                                                                                    | MAF_diss | MaxDBAltAF | num_non | num_re | Causal | Prediction_other                     |
|-----|----------|---------|---------|-------|----------|----------------------------------------------------------------------------------------------------------------------------------------------------------------------------------------------------------------------------------------------------------------------------------------------------|----------|------------|---------|--------|--------|--------------------------------------|
| 9   | 1.4E+08  | T/C     | ID83408 | GRIN1 | missense | LRRC26:NM_001013653(2Exons):downstream+966;GRIN1:NM_021569(19Exons):3UTR+266;GRIN1:NM_007327(20Exons):3UTR+266;GRIN1:NM_001185090(21Exons):exon21:c.T2783C:p.I928T&missense;GRIN1:NM_001185091(20Exons):exon20:c.T2672C:p.I891T&missense;GRIN1:NM_000832(19Exons):exon19:c.T2609C:p.I870T&missense | 0.001582 | N          | 1       | 0      | Y      | A;D;F:0.039:0.846:0.75               |
| 11  | 64428398 | C/T     | ID96285 | NRXN2 | missense | NRXN2:NM_138732(20Exons):exon9:c.G1919A:p.R640Q&missense;NRXN2:NM_015080(23Exons):exon10:c.G2012A:p.R671Q&missense                                                                                                                                                                                 | 0.001582 | N          | 1       | 0      | Y      | A;G;B;C;J;D;E;H;F:0.0283:0.944:0.891 |
| 11  | 64428458 | C/A     | ID96286 | NRXN2 | missense | NRXN2:NM_138732(20Exons):exon9:c.G1859T:p.R620L&missense;NRXN2:NM_015080(23Exons):exon10:c.G1952T:p.R651L&missense                                                                                                                                                                                 | 0.001582 | N          | 1       | 0      | Y      | A;K;G;B;C;D;E;H:0.0491:0.827:0.776   |



**eTable 8 (continued). Information about variants identified in the reduced AMPA-mediated synaptic current in the discovery exome study**

| CHR | POS      | REF/<br>ALT | rsID            | Gene      | Variant      | RefGeneFeatures                                                                                                               | MAF_<br>di<br>s | MaxD<br>BAltA<br>F | num_<br>non | num_<br>re | Cau<br>sal | Prediction_<br>other               |
|-----|----------|-------------|-----------------|-----------|--------------|-------------------------------------------------------------------------------------------------------------------------------|-----------------|--------------------|-------------|------------|------------|------------------------------------|
| 11  | 64434956 | G/A         | rs2012<br>58323 | NRXN<br>2 | missens<br>e | NRXN2:NM_138732(20Exons):exon8:<br>c.C1471T:p.R491C&missense;NRXN2<br>:NM_015080(23Exons):exon9:c.C1564<br>T:p.R522C&missense | 0.00158<br>2    | 5.00E-<br>04       | 0           | 1          | Y          | A;B;C;D;E;F:0.04<br>84:0.828:0.792 |
| 11  | 64434997 | C/T         | rs1405<br>88352 | NRXN<br>2 | missens<br>e | NRXN2:NM_138732(20Exons):exon8:<br>c.G1430A:p.R477H&missense;NRXN<br>2:NM_015080(23Exons):exon9:c.G15<br>23A:p.R508H&missense | 0.00158<br>2    | 0.0068<br>15       | 1           | 0          | Y          | G;B;C;D;H:0.054<br>1:0.817:0.783   |
| 11  | 64435078 | T/A         | rs1391<br>50995 | NRXN<br>2 | missens<br>e | NRXN2:NM_138732(20Exons):exon8:<br>c.A1349T:p.D450V&missense;NRXN<br>2:NM_015080(23Exons):exon9:c.A14<br>42T:p.D481V&missense | 0.00316<br>5    | 2.20E-<br>04       | 1           | 1          | Y          | K;B;J;D:0.028:0.9<br>42:0.879      |
| 14  | 79175905 | A/G         | ID1170<br>03    | NRXN<br>3 | missens<br>e | NRXN3:NR_073547(21Exons):ncRN<br>A;NRXN3:NM_004796(17Exons):exo<br>n4:c.A448G:p.M150V&missense                                | 0.00158<br>2    | N                  | 1           | 0          | Y          | B;C;D;F:0.0435:0<br>.843:0.771     |
| 14  | 79423698 | G/A         | ID1170<br>04    | NRXN<br>3 | missens<br>e | NRXN3:NR_073547(21Exons):ncRN<br>A;NRXN3:NM_004796(17Exons):exo<br>n8:c.G1270A:p.A424T&missense                               | 0.00158<br>2    | N                  | 0           | 1          | Y          | B;D;H;F:0.0414:0<br>.84:0.742      |
| 14  | 79432407 | A/G         | ID1170          | NRXN      | missens      | NRXN3:NR_073547(21Exons):ncRN                                                                                                 | 0.00158         | N                  | 0           | 1          | Y          | B;D;H;F:0.0414:0                   |

|  |  |  |    |   |   |                                                            |   |  |  |  |  |           |
|--|--|--|----|---|---|------------------------------------------------------------|---|--|--|--|--|-----------|
|  |  |  | 05 | 3 | e | A;NRXN3:NM_004796(17Exons):exon9:c.A1316G:p.N439S&missense | 2 |  |  |  |  | .84:0.742 |
|--|--|--|----|---|---|------------------------------------------------------------|---|--|--|--|--|-----------|

**eTable 8 (continued). Information about variants identified in the reduced AMPA-mediated synaptic current in the discovery exome study**

| CHR | POS      | REF/ALT | rsID     | Gene  | Variant  | RefGeneFeatures                                                                                                                                                                                                                                                                                        | MAF_diss | MaxDBAltAF | num_non | num_re | Causal | Prediction_other                |
|-----|----------|---------|----------|-------|----------|--------------------------------------------------------------------------------------------------------------------------------------------------------------------------------------------------------------------------------------------------------------------------------------------------------|----------|------------|---------|--------|--------|---------------------------------|
| 14  | 80164153 | T/G     | ID117007 | NRXN3 | missense | NRXN3:NR_073546(8Exons):ncRNA; NRXN3:NR_073547(21Exons):ncRNA; NRXN3:NM_001105250(7Exons):exon5:c.T872G:p.V291G&missense; NRXN3:NM_138970(6Exons):exon4:c.T782G:p.V261G&missense; NRXN3:NM_001272020(6Exons):exon4:c.T782G:p.V261G&missense; NRXN3:NM_004796(17Exons):exon15:c.T2678G:p.V893G&missense | 0.001582 | N          | 1       | 0      | Y      | G;B;C;D;E;F:0.0447:0.839:0.772  |
| 14  | 80327583 | A/T     | ID117011 | NRXN3 | missense | NRXN3:NR_073546(8Exons):ncRNA; NRXN3:NR_073547(21Exons):ncRNA; NRXN3:NM_001105250(7Exons):intrinsic6; NRXN3:NM_138970(6Exons):intrinsic5; NRXN3:NM_004796(17Exons):intrinsic16; NRXN3:NM_001272020(6Exons):exon6:c.A1190T:p.D397V&missense                                                             | 0.001582 | N          | 1       | 0      | Y      | G;B;J;D;E;H;F:0.0311:0.938:0.89 |

**eTable 8 (continued). Information about variants identified in the reduced AMPA-mediated synaptic current in the discovery exome study**

| CHR | POS      | REF/ALT | rsID        | Gene     | Variante | RefGeneFeatures                                                                                                         | MAF_dis  | MaxDBAltAF | num_non | num_re | Causal | Prediction_other                 |
|-----|----------|---------|-------------|----------|----------|-------------------------------------------------------------------------------------------------------------------------|----------|------------|---------|--------|--------|----------------------------------|
| 17  | 7097669  | C/T     | ID134394    | DLG4     | missense | DLG4:NM_001365(22Exons):exon14:c.G1576A:p.D526N&missense;DLG4:NM_001128827(20Exons):exon12:c.G1438A:p.D480N&missense    | 0.001582 | N          | 0       | 1      | Y      | A;B;C;D;E;H;F:0.0432:0.844:0.773 |
| 19  | 54416185 | C/G     | rs185024703 | CACNG7   | missense | CACNG7:NM_031896(5Exons):exon1:c.C100G:p.L34V&missense                                                                  | 0.001582 | 5.00E-04   | 1       | 0      | Y      | A;B;C;D;E;F:0.0484:0.828:0.792   |
| 22  | 36960595 | C/T     | ID167064    | CACNG2   | missense | CACNG2:NM_006078(4Exons):exon4:c.G775A:p.G259S&missense                                                                 | 0.001582 | N          | 1       | 0      | Y      | B;C;D;F:0.0435:0.843:0.771       |
| 22  | 51041880 | C/T     | ID169163    | MAPK8IP2 | missense | MAPK8IP2:NM_016431(10Exons):exon1:c.C319T:p.H107Y&missense;MAPK8IP2:NM_012324(12Exons):exon3:c.C400T:p.H134Y&missense   | 0.001582 | N          | 1       | 0      | Y      | A;D;E;F:0.0413:0.843:0.755       |
| 22  | 51044133 | C/T     | ID169174    | MAPK8IP2 | missense | MAPK8IP2:NM_016431(10Exons):exon5:c.C1903T:p.R635W&missense;MAPK8IP2:NM_012324(12Exons):exon7:c.C1984T:p.R662W&missense | 0.001582 | N          | 1       | 0      | Y      | A;D;E;F:0.0413:0.843:0.755       |

NOTE:

MAF\_dis: MAF (in our discovery sample); num\_non: Count in Non-responder; num\_re: Count in Responder; Causal: IsDiseaseCausal\_predicted\_by\_KGGSeq; Prediction\_other: Prediction\_by\_other\_deleteriousness\_prediction\_tools; In the last column, prediction tools are labeled with letters: A-SIFT\_score; B-MutationTaster\_score; C- MutationAssessor\_score; D-CADD\_raw; E-GERP++\_NR; F-phyloP100way\_vertibrate; G-Polyphen2\_HVAR\_score; H-GERP++\_RS; I-SiPhy\_29way\_logOdds; J-FATHMM\_score; K-Polyphen2\_HDIV\_score

**eTable 9. Information about variants identified in the abnormal AMPA-mediated synaptic current in the discovery exome study**

| CHR | POS      | REF/ALT | rsID        | Gene  | Variante | RefGeneFeatures                                                                                                                                                                                                                                                                | MAF_diss | MaxDBAltAF | num_non | num_re | Causal | Prediction_other                 |
|-----|----------|---------|-------------|-------|----------|--------------------------------------------------------------------------------------------------------------------------------------------------------------------------------------------------------------------------------------------------------------------------------|----------|------------|---------|--------|--------|----------------------------------|
| 4   | 1.58E+08 | G/A     | ID45267     | GRIA2 | missense | GRIA2:NM_001083620(16Exons):exon3:c.G172A:p.G58R&missense;GRIA2:NM_000826(16Exons):exon3:c.G313A:p.G105R&missense;GRIA2:NM_001083619(16Exons):exon3:c.G313A:p.G105R&missense                                                                                                   | 0.001582 | N          | 1       | 0      | Y      | A;B;C;D;E;F:0.084:0.828:0.792    |
| 4   | 1.58E+08 | C/T     | rs199654327 | GRIA2 | missense | GRIA2:NM_001083620(16Exons):exon4:c.C335T:p.S112L&missense;GRIA2:NM_000826(16Exons):exon4:c.C476T:p.S159L&missense;GRIA2:NM_001083619(16Exons):exon4:c.C476T:p.S159L&missense                                                                                                  | 0.001587 | 5.00E-04   | 1       | 0      | Y      | A;B;C;D;E;H;F:0.0432:0.844:0.773 |
| 9   | 1.4E+08  | G/A     | ID83395     | GRIN1 | missense | GRIN1:NM_021569(19Exons):exon1:c.G14A:p.R5H&missense;GRIN1:NM_007327(20Exons):exon1:c.G14A:p.R5H&missense;GRIN1:NM_001185090(21Exons):exon1:c.G14A:p.R5H&missense;GRIN1:NM_001185091(20Exons):exon1:c.G14A:p.R5H&missense;GRIN1:NM_000832(19Exons):exon1:c.G14A:p.R5H&missense | 0.001582 | N          | 1       | 0      | Y      | A;G;B;D;H;F:0.0369:0.864:0.727   |

**Table 9 (continued). Information about variants identified in the abnormal AMPA-mediated synaptic current in the discovery exome study**

| CHR | POS     | REF/ALT | rsID    | Gene  | Variant  | RefGeneFeatures                                                                                                                                                                                                                                                                               | MAF_diss | MaxDBAltaF | num_non | num_re | Causal | Prediction_other                   |
|-----|---------|---------|---------|-------|----------|-----------------------------------------------------------------------------------------------------------------------------------------------------------------------------------------------------------------------------------------------------------------------------------------------|----------|------------|---------|--------|--------|------------------------------------|
| 9   | 1.4E+08 | T/C     | ID83396 | GRIN1 | missense | GRIN1:NM_021569(19Exons):exon1:c.T86C:p.I29T&missense;GRIN1:NM_007327(20Exons):exon1:c.T86C:p.I29T&missense;GRIN1:NM_001185090(21Exons):exon1:c.T86C:p.I29T&missense;GRIN1:NM_001185091(20Exons):exon1:c.T86C:p.I29T&missense;GRIN1:NM_000832(19Exons):exon1:c.T86C:p.I29T&missense           | 0.001582 | N          | 0       | 1      | Y      | A;B;C;D;H;F:0.0455:0.832:0.786     |
| 9   | 1.4E+08 | C/G     | ID83401 | GRIN1 | missense | GRIN1:NM_021569(19Exons):exon5:c.C701G:p.A234G&missense;GRIN1:NM_007327(20Exons):exon5:c.C701G:p.A234G&missense;GRIN1:NM_001185090(21Exons):exon6:c.C764G:p.A255G&missense;GRIN1:NM_001185091(20Exons):exon6:c.C764G:p.A255G&missense;GRIN1:NM_000832(19Exons):exon5:c.C701G:p.A234G&missense | 0.001582 | N          | 1       | 0      | Y      | A;K;G;B;C;D;E;F:0.0405:0.851:0.764 |

**eTable 9 (continued). Information about variants identified in the abnormal AMPA-mediated synaptic current in the discovery exome study**

| CHR | POS      | REF/ALT | rsID    | Gene  | Variant  | RefGeneFeatures                                                                                                                                                                                                                                                                                    | MAF_diss | MaxDBAltAF | num_non | num_re | Causal | Prediction_other               |
|-----|----------|---------|---------|-------|----------|----------------------------------------------------------------------------------------------------------------------------------------------------------------------------------------------------------------------------------------------------------------------------------------------------|----------|------------|---------|--------|--------|--------------------------------|
| 9   | 1.4E+08  | T/C     | ID83408 | GRIN1 | missense | LRRC26:NM_001013653(2Exons):downstream+966;GRIN1:NM_021569(19Exons):3UTR+266;GRIN1:NM_007327(20Exons):3UTR+266;GRIN1:NM_001185090(21Exons):exon21:c.T2783C:p.I928T&missense;GRIN1:NM_001185091(20Exons):exon20:c.T2672C:p.I891T&missense;GRIN1:NM_000832(19Exons):exon19:c.T2609C:p.I870T&missense | 0.001582 | N          | 1       | 0      | Y      | A;D;F:0.039:0.846:0.75         |
| 11  | 1.06E+08 | G/A     | ID99498 | GRIA4 | missense | GRIA4:NR_046356(17Exons):ncRNA;GRIA4:NM_001112812(10Exons):exon3:c.G334A:p.A112T&missense;GRIA4:NM_001077243(17Exons):exon4:c.G334A:p.A112T&missense;GRIA4:NM_000829(17Exons):exon4:c.G334A:p.A112T&missense;GRIA4:NM_001077244(11Exons):exon4:c.G334A:p.A112T&missense                            | 0.001582 | N          | 1       | 0      | Y      | A;B;C;D;E;F:0.0484:0.828:0.792 |

**eTable 9 (continued). Information about variants identified in the abnormal AMPA-mediated synaptic current in the discovery exome study**

| CHR | POS      | REF/ALT | rsID    | Gene  | Variant  | RefGeneFeatures                                                                                                                                                                                                                                                          | MAF_diss | MaxDBAltAF | num_non | num_re | Causal | Prediction_other           |
|-----|----------|---------|---------|-------|----------|--------------------------------------------------------------------------------------------------------------------------------------------------------------------------------------------------------------------------------------------------------------------------|----------|------------|---------|--------|--------|----------------------------|
| 11  | 1.06E+08 | G/A     | ID99500 | GRIA4 | missense | GRIA4:NR_046356(17Exons):ncRNA; GRIA4:NM_001112812(10Exons):exon3:c.G458A:p.C153Y&missense;GRIA4:NM_001077243(17Exons):exon4:c.G458A:p.C153Y&missense;GRIA4:NM_000829(17Exons):exon4:c.G458A:p.C153Y&missense;GRIA4:NM_001077244(11Exons):exon4:c.G458A:p.C153Y&missense | 0.001582 | N          | 0       | 1      | Y      | A;D;E;F:0.0413:0.843:0.755 |
| 11  | 1.06E+08 | A/G     | ID99502 | GRIA4 | missense | GRIA4:NR_046356(17Exons):ncRNA; GRIA4:NM_001112812(10Exons):exon4:c.A569G:p.N190S&missense;GRIA4:NM_001077243(17Exons):exon5:c.A569G:p.N190S&missense;GRIA4:NM_000829(17Exons):exon5:c.A569G:p.N190S&missense;GRIA4:NM_001077244(11Exons):exon5:c.A569G:p.N190S&missense | 0.001587 | N          | 0       | 1      | Y      | B;D;E;F:0.0342:0.872:0.702 |



**eTable 9 (continued). Information about variants identified in the abnormal AMPA-mediated synaptic current in the discovery exome study**

| CHR | POS      | REF/ALT | rsID     | Gene   | Variant  | RefGeneFeatures                                                                                                                                                                                                                                                          | MAF_diss | MaxDBAltAF | num_non | num_re | Causal | Prediction_other                 |
|-----|----------|---------|----------|--------|----------|--------------------------------------------------------------------------------------------------------------------------------------------------------------------------------------------------------------------------------------------------------------------------|----------|------------|---------|--------|--------|----------------------------------|
| 11  | 1.06E+08 | T/C     | ID99505  | GRIA4  | missense | GRIA4:NR_046356(17Exons):ncRNA; GRIA4:NM_001112812(10Exons):exon5:c.T716C:p.I239T&missense;GRIA4:NM_001077243(17Exons):exon6:c.T716C:p.I239T&missense;GRIA4:NM_000829(17Exons):exon6:c.T716C:p.I239T&missense;GRIA4:NM_001077244(11Exons):exon6:c.T716C:p.I239T&missense | 0.001592 | N          | 1       | 0      | Y      | A;B;C;D;E;H;F:0.0432:0.844:0.773 |
| 11  | 1.06E+08 | T/A     | ID99512  | GRIA4  | missense | GRIA4:NR_046356(17Exons):ncRNA; GRIA4:NM_001077243(17Exons):exon13:c.T1849A:p.S617T&missense;GRIA4:NM_000829(17Exons):exon13:c.T1849A:p.S617T&missense                                                                                                                   | 0.001582 | N          | 0       | 1      | Y      | A;B;C;D;E;F:0.0484:0.828:0.792   |
| 12  | 13716186 | C/T     | ID102947 | GRIN2B | missense | GRIN2B:NM_000834(13Exons):exon13:c.G3986A:p.R1329Q&missense                                                                                                                                                                                                              | 0.001582 | N          | 1       | 0      | Y      | A;B;C;D;E;F:0.0484:0.828:0.792   |
| 12  | 13717061 | G/T     | ID102948 | GRIN2B | missense | GRIN2B:NM_000834(13Exons):exon13:c.C3111A:p.D1037E&missense                                                                                                                                                                                                              | 0.001582 | N          | 1       | 0      | Y      | K;B;E;F:0.0365:0.847:0.69        |
| 12  | 13717533 | C/T     | ID102949 | GRIN2B | missense | GRIN2B:NM_000834(13Exons):exon13:c.G2639A:p.R880H&missense                                                                                                                                                                                                               | 0.003165 | N          | 1       | 1      | Y      | A;D;E;F:0.0413:0.843:0.755       |

**eTable 9 (continued). Information about variants identified in the abnormal AMPA-mediated synaptic current in the discovery exome study**

| CHR | POS      | REF/ALT | rsID      | Gene  | Variant  | RefGeneFeatures                                                                                                      | MAF_diss | MaxDBAltAF | num_non | num_re | Causal | Prediction_other                    |
|-----|----------|---------|-----------|-------|----------|----------------------------------------------------------------------------------------------------------------------|----------|------------|---------|--------|--------|-------------------------------------|
| 14  | 64935238 | A/T     | ID115937  | AKAP5 | missense | AKAP5:NM_004857(2Exons):exon2:c.A126T:p.K42N&missense                                                                | 0.001582 | N          | 1       | 0      | Y      | A;G;B;J;D;E;H;F;I:0.0298:0.94:0.893 |
| 14  | 64935411 | C/T     | rs2230491 | AKAP5 | missense | AKAP5:NM_004857(2Exons):exon2:c.C299T:p.P100L&missense                                                               | 0.004747 | 0.149651   | 3       | 0      | Y      | A;B;J;E:0.0316:0.929:0.891          |
| 14  | 64935674 | C/T     | ID115939  | AKAP5 | missense | AKAP5:NM_004857(2Exons):exon2:c.C562T:p.R188W&missense                                                               | 0.001582 | N          | 1       | 0      | Y      | A;B;E;H;F;I:0.0287:0.885:0.676      |
| 17  | 7097669  | C/T     | ID134394  | DLG4  | missense | DLG4:NM_001365(22Exons):exon14:c.G1576A:p.D526N&missense;DLG4:NM_001128827(20Exons):exon12:c.G1438A:p.D480N&missense | 0.001582 | N          | 0       | 1      | Y      | A;B;C;D;E;H;F:0.0432:0.844:0.773    |

**eTable 9 (continued). Information about variants identified in the abnormal AMPA-mediated synaptic current in the discovery exome study**

| CHR | POS      | REF/ALT | rsID     | Gene   | Variant  | RefGeneFeatures                                                                                                                                                                                                                                                                                                                                                        | MAF_dis  | MaxDBAltAF | num_non | num_re | Causal | Prediction_other                 |
|-----|----------|---------|----------|--------|----------|------------------------------------------------------------------------------------------------------------------------------------------------------------------------------------------------------------------------------------------------------------------------------------------------------------------------------------------------------------------------|----------|------------|---------|--------|--------|----------------------------------|
| 21  | 46596346 | C/T     | ID164351 | ADARB1 | missense | ADARB1:NR_027672(11Exons):ncRNA;ADARB1:NR_073200(13Exons):ncRNA;ADARB1:NR_027673(13Exons):ncRNA;ADARB1:NR_027674(12Exons):ncRNA;ADARB1:NM_001112(11Exons):exon4:c.C730T:p.R244C&missense;ADARB1:NM_015833(12Exons):exon4:c.C730T:p.R244C&missense;ADARB1:NM_015834(13Exons):exon4:c.C730T:p.R244C&missense;ADARB1:NM_001160230(12Exons):exon4:c.C730T:p.R244C&missense | 0.001582 | N          | 1       | 0      | Y      | A;B;C;D;E;H;F:0.0432:0.844:0.773 |
| 22  | 36960595 | C/T     | ID167064 | CACNG2 | missense | CACNG2:NM_006078(4Exons):exon4:c.G775A:p.G259S&missense                                                                                                                                                                                                                                                                                                                | 0.001582 | N          | 1       | 0      | Y      | B;C;D;F:0.0435:0.843:0.771       |

NOTE: MAF\_dis: MAF (in our discovery sample); num\_non: Count in Non-responder; num\_re: Count in Responder; Causal:

IsDiseaseCausal\_predicted\_by\_KGGSeq; Prediction\_other: Prediction\_by\_other\_deleteriousness\_prediction\_tools; In the last column, prediction tools are labeled with letters: A-SIFT\_score; B-MutationTaster\_score; C- MutationAssessor\_score; D-CADD\_raw; E-GERP++\_NR; F-phyloP100way\_vertebrate; G-Polyphen2\_HVAR\_score; H-GERP++\_RS; I-SiPhy\_29way\_logOdds; J-FATHMM\_score; K-Polyphen2\_HDIV\_score

**eTable 10. Set-based association results on candidate gene-sets in the discovery exome on rare (MAF<0.01) synonymous variants**

| GeneSet                                                  | NVAR | Allele count<br>(Non-re/ Re) | P        |
|----------------------------------------------------------|------|------------------------------|----------|
| abnormal long term potentiation                          | 98   | 91/64                        | 0.030702 |
| abnormal NMDA-mediated synaptic currents                 | 33   | 30/16                        | 0.056277 |
| reduced long term potentiation                           | 428  | 327/289                      | 0.094891 |
| enhanced paired-pulse facilitation                       | 107  | 85/69                        | 0.12     |
| REACTOME_TANDEM_PORE_DOMAIN_POTASSIUM_CHANNELNELS        | 36   | 27/19                        | 0.121212 |
| increased prepulse inhibition                            | 38   | 39/30                        | 0.139535 |
| abnormal AMPA-mediated synaptic currents                 | 27   | 26/18                        | 0.16     |
| abnormal excitatory postsynaptic currents                | 355  | 275/250                      | 0.196429 |
| REACTOME_ACETYLCHOLINE_NEUROTRANSMITTER_RELEASE_CYCLE    | 19   | 13/10                        | 0.25     |
| REACTOME_IONOTROPIC_ACTIVITY_OF_KAINATE_RECEPTORS        | 27   | 21/19                        | 0.268293 |
| abnormal miniature endplate potential                    | 136  | 109/97                       | 0.277778 |
| abnormal CNS synaptic transmission                       | 417  | 295/283                      | 0.30303  |
| decreased prepulse inhibition                            | 188  | 132/121                      | 0.30303  |
| decreased post-tetanic potentiation                      | 41   | 28/23                        | 0.3125   |
| REACTOME_GABA_SYNTHESIS_RELEASE_REUPTAKE_AND_DEGRADATION | 29   | 23/16                        | 0.3125   |
| abnormal long term depression                            | 76   | 58/52                        | 0.322581 |
| abnormal synaptic dopamine release                       | 35   | 25/20                        | 0.470588 |

**eTable 10 (continued). Set-based association results on candidate gene-sets in the discovery exome on rare (MAF<0.01) synonymous variants**

| GeneSet                                                                                         | NVAR | Allele count<br>(Non-re/ Re) | P        |
|-------------------------------------------------------------------------------------------------|------|------------------------------|----------|
| abnormal glutamate-mediated receptor currents                                                   | 51   | 34/33                        | 0.538462 |
| decreased paired-pulse facilitation                                                             | 59   | 42/44                        | 0.538462 |
| REACTOME_DOPAMINE_NEUROTRANSMITTER_RELEASE_CYCLE                                                | 22   | 15/14                        | 0.538462 |
| REACTOME_NEUROTRANSMITTER_RELEASE_CYCLE                                                         | 73   | 53/47                        | 0.538462 |
| decreased synaptic depression                                                                   | 74   | 52/56                        | 0.583333 |
| reduced long term depression                                                                    | 135  | 104/99                       | 0.6      |
| enhanced long term potentiation                                                                 | 205  | 152/148                      | 0.6      |
| decreased excitatory postsynaptic current amplitude                                             | 70   | 59/53                        | 0.6      |
| REACTOME_NEUROTRANSMITTER_RECEPTOR_BINDING_AND_DOWNSTREAM_TRANSMISSION_IN_THE_POSTSYNAPTIC_CELL | 348  | 216/295                      | 0.6      |
| REACTOME_VOLTAGE_GATED_POTASSIUM_CHANNELS                                                       | 144  | 106/97                       | 0.6      |
| REACTOME_POST_NMDA_RECEPTOR_ACTIVATION_EVENTS                                                   | 106  | 79/88                        | 0.666667 |
| REACTOME_TRANSMISSION_ACROSS_CHEMICAL_SYNAPSES                                                  | 480  | 310/391                      | 0.666667 |
| abnormal neurotransmitter level                                                                 | 41   | 26/35                        | 0.714286 |
| abnormal prepulse inhibition                                                                    | 37   | 23/26                        | 0.714286 |
| abnormal synaptic transmission                                                                  | 118  | 71/85                        | 0.714286 |
| decreased neurotransmitter release                                                              | 101  | 67/69                        | 0.714286 |

**eTable 10 (continued). Set-based association results on candidate gene-sets in the discovery exome on rare (MAF<0.01) synonymous variants**

| GeneSet                                                             | NVAR | Allele count<br>(Non-re/ Re) | P        |
|---------------------------------------------------------------------|------|------------------------------|----------|
| abnormal miniature excitatory postsynaptic currents                 | 306  | 221/216                      | 0.714286 |
| REACTOME_ACTIVATION_OF_KAINATE_RECEPTORS_UP<br>ON_Glutamate_BINDING | 66   | 45/61                        | 0.714286 |
| REACTOME_TRAFFICKING_OF_GLUR2_CONTAINING_AM<br>PA_RECEPTORS         | 37   | 24/32                        | 0.714286 |
| absent long term depression                                         | 133  | 102/106                      | 0.833333 |
| reduced NMDA-mediated synaptic currents                             | 66   | 41/57                        | 0.833333 |
| abnormal excitatory postsynaptic potential                          | 271  | 196/209                      | 0.833333 |
| abnormal PNS synaptic transmission                                  | 29   | 20/20                        | 0.833333 |
| abnormal endplate potential                                         | 74   | 56/61                        | 0.833333 |
| abnormal GABA-mediated receptor currents                            | 57   | 39/42                        | 0.833333 |
| decreased synaptic glutamate release                                | 41   | 31/36                        | 0.833333 |
| abnormal paired-pulse inhibition                                    | 58   | 40/48                        | 0.833333 |
| abnormal synaptic acetylcholine release                             | 30   | 20/24                        | 0.833333 |
| abnormal neurotransmitter secretion                                 | 46   | 31/28                        | 0.833333 |
| abnormal miniature inhibitory postsynaptic currents                 | 81   | 56/63                        | 0.833333 |
| Cholinergic_synapse                                                 | 406  | 264/315                      | 0.833333 |
| Dopaminergic_synapse                                                | 337  | 241/278                      | 0.833333 |
| Long-term_depression                                                | 227  | 165/186                      | 0.833333 |
| Neurotrophin_signaling_pathway                                      | 295  | 203/218                      | 0.833333 |
| Retrograde_endocannabinoid_signaling                                | 357  | 250/268                      | 0.833333 |

**Table 10 (continued). Set-based association results on candidate gene-sets in the discovery exome on rare (MAF<0.01) synonymous variants**

| GeneSet                                                                             | NVAR | Allele count<br>(Non-re/ Re) | P        |
|-------------------------------------------------------------------------------------|------|------------------------------|----------|
| REACTOME_ACETYLCHOLINE_BINDING_AND_DOWNSTREAM_EVENTS                                | 35   | 18/28                        | 0.833333 |
| REACTOME_ACTIVATION_OF_NMDA_RECEPTOR_UPON_GLUTAMATE_BINDING_AND_POSTSYNAPTIC_EVENTS | 113  | 84/94                        | 0.833333 |
| REACTOME_CREB_PHOSPHORYLATION_THROUGH_THE_ACTIVATION_OF_CAMKII                      | 57   | 43/48                        | 0.833333 |
| REACTOME_CREB_PHOSPHORYLATION_THROUGH_THE_ACTIVATION_OF_RAS                         | 84   | 68/74                        | 0.833333 |
| REACTOME_GABA_A_RECEPTOR_ACTIVATION                                                 | 20   | 13/17                        | 0.833333 |
| REACTOME_GLUTAMATE_NEUROTRANSMITTER_RELEASE_CYCLE                                   | 28   | 17/17                        | 0.833333 |
| REACTOME_HIGHLY_CALCIIUM_PERMEABLE_POSTSYNAPTIC_NICOTINIC_ACETYLCHOLINE_RECEPTORS   | 29   | 12/25                        | 0.833333 |
| REACTOME_INHIBITION_OF_VOLTAGE_GATED_CA2_CHANNELS_VIA_GBETA_GAMMA_SUBUNITS          | 40   | 16/36                        | 0.833333 |
| REACTOME_NOREPINEPHRINE_NEUROTRANSMITTER_RELEASE_CYCLE                              | 14   | 6/9                          | 0.833333 |
| REACTOME_RAS_ACTIVATION_UPON_CA2_INFUX_THROUGH_NMDA_RECEPTOR                        | 61   | 51/51                        | 0.833333 |
| REACTOME_TRAFFICKING_OF_AMPA_RECEPTORS                                              | 57   | 32/47                        | 0.833333 |
| increased synaptic depression                                                       | 55   | 38/37                        | 1        |

**eTable 10 (continued). Set-based association results on candidate gene-sets in the discovery exome on rare (MAF<0.01) synonymous variants**

| GeneSet                                                               | NVAR | Allele count<br>(Non-re/ Re) | P |
|-----------------------------------------------------------------------|------|------------------------------|---|
| abnormal inhibitory postsynaptic currents                             | 237  | 155/164                      | 1 |
| abnormal channel response                                             | 130  | 84/100                       | 1 |
| reduced AMPA-mediated synaptic currents                               | 62   | 44/43                        | 1 |
| GABAergic_synapse                                                     | 258  | 153/201                      | 1 |
| Glutamatergic_synapse                                                 | 404  | 286/316                      | 1 |
| Long-term_potentiation                                                | 228  | 166/192                      | 1 |
| Serotonergic_synapse                                                  | 327  | 247/257                      | 1 |
| Synaptic_vesicle_cycle                                                | 161  | 110/113                      | 1 |
| REACTOME_ADENYLATE_CYCLASE_INHIBITORY_PATHWAY                         | 67   | 37/52                        | 1 |
| REACTOME_GABA_B_RECEPTOR_ACTIVATION                                   | 107  | 53/88                        | 1 |
| REACTOME_GABA_RECEPTOR_ACTIVATION                                     | 131  | 66/109                       | 1 |
| REACTOME_INWARDLY_RECTIFYING_K_CHANNELS                               | 64   | 32/51                        | 1 |
| REACTOME_POTASSIUM_CHANNELS                                           | 274  | 187/186                      | 1 |
| REACTOME_PRESYNAPTIC_NICOTINIC_ACETYLCHOLINE_RECEPTORS                | 31   | 16/25                        | 1 |
| REACTOME_UNBLOCKING_OF_NMDA_RECEPTOR_GLUTAMATE_BINDING_AND_ACTIVATION | 58   | 44/48                        | 1 |

NOTE: Non-re/ Re : Non-responder/ Responder



**eTable 11. Full list of genes selected for targeted sequencing**

| Gene           | Reason of being selected                   | Successfully sequenced |
|----------------|--------------------------------------------|------------------------|
| <i>ADARB1</i>  | gene member of abnormal AMPA               | Yes                    |
| <i>AKAP5</i>   | gene member of abnormal AMPA               | Yes                    |
| <i>APOC3</i>   | investigator's interest                    | No                     |
| <i>ARC</i>     | gene member of abnormal AMPA               | Yes                    |
| <i>BRD2</i>    | investigator's interest                    | Yes                    |
| <i>CACNG2</i>  | gene member of reduced AMPA, abnormal AMPA | Yes                    |
| <i>CACNG7</i>  | gene member of reduced AMPA                | Yes                    |
| <i>CACNG8</i>  | gene member of abnormal AMPA               | Yes                    |
| <i>CCNE1</i>   | gene member of reduced NMDA                | Yes                    |
| <i>CCNE2</i>   | gene member of reduced NMDA                | Yes                    |
| <i>CNIH2</i>   | gene member of reduced AMPA, abnormal AMPA | Yes                    |
| <i>CNIH3</i>   | gene member of reduced AMPA                | Yes                    |
| <i>CNR1</i>    | investigator's interest                    | Yes                    |
| <i>COMT</i>    | investigator's interest                    | Yes                    |
| <i>CYP1A2</i>  | investigator's interest                    | Yes                    |
| <i>CYP2C19</i> | investigator's interest                    | Yes                    |
| <i>CYP2D6</i>  | investigator's interest                    | Yes                    |
| <i>CYP2E1</i>  | investigator's interest                    | Yes                    |
| <i>CYP3A4</i>  | investigator's interest                    | Yes                    |
| <i>CYP3A5</i>  | investigator's interest                    | Yes                    |
| <i>CYP3A7</i>  | investigator's interest                    | No                     |

**eTable 11 (continued). Full list of genes selected for targeted sequencing**

| Gene          | Reason of being selected                                 | Successfully sequenced |
|---------------|----------------------------------------------------------|------------------------|
| <i>DAPK1</i>  | gene member of reduced NMDA                              | Yes                    |
| <i>DBH</i>    | investigator's interest                                  | Yes                    |
| <i>DLG4</i>   | gene member of reduced AMPA, abnormal AMPA               | Yes                    |
| <i>DRD1</i>   | investigator's interest                                  | Yes                    |
| <i>DRD2</i>   | investigator's interest                                  | Yes                    |
| <i>DRD3</i>   | investigator's interest                                  | Yes                    |
| <i>DRD4</i>   | investigator's interest                                  | Yes                    |
| <i>EXT1</i>   | gene member of reduced AMPA                              | Yes                    |
| <i>FABP7</i>  | gene member of reduced NMDA                              | Yes                    |
| <i>FAT1</i>   | investigator's interest                                  | No                     |
| <i>FMO3</i>   | investigator's interest                                  | Yes                    |
| <i>FOSB</i>   | gene member of reduced NMDA                              | Yes                    |
| <i>GHRL</i>   | investigator's interest                                  | No                     |
| <i>GNB3</i>   | investigator's interest                                  | Yes                    |
| <i>GRIA1</i>  | gene member of reduced AMPA                              | Yes                    |
| <i>GRIA2</i>  | gene member of abnormal AMPA                             | Yes                    |
| <i>GRIA4</i>  | gene member of abnormal AMPA                             | Yes                    |
| <i>GRID1</i>  | Nominal p-value among candidate examined                 | No                     |
| <i>GRIN1</i>  | gene member of reduced NMDA, reduced AMPA, abnormal AMPA | Yes                    |
| <i>GRIN2A</i> | gene member of reduced NMDA                              | Yes                    |

**eTable 11 (continued). Full list of genes selected for targeted sequencing**

| Gene            | Reason of being selected                  | Successfully sequenced |
|-----------------|-------------------------------------------|------------------------|
| <i>GRIN2A</i>   | gene member of reduced NMDA               | Yes                    |
| <i>GRIN2B</i>   | gene member of abnormal AMPA              | Yes                    |
| <i>GRM3</i>     | investigator's interest                   | Yes                    |
| <i>GRM7</i>     | Nominal p-value among candidate examined  | No                     |
| <i>HTR1A</i>    | investigator's interest                   | Yes                    |
| <i>HTR2A</i>    | investigator's interest                   | Yes                    |
| <i>HTR2C</i>    | investigator's interest                   | Yes                    |
| <i>HTR3A</i>    | investigator's interest                   | Yes                    |
| <i>HTR6</i>     | investigator's interest                   | Yes                    |
| <i>HTR7</i>     | investigator's interest                   | Yes                    |
| <i>KALRN</i>    | gene member of reduced AMPA               | Yes                    |
| <i>KIF17</i>    | gene member of reduced NMDA               | Yes                    |
| <i>LEP</i>      | investigator's interest                   | Yes                    |
| <i>LEPR</i>     | investigator's interest                   | Yes                    |
| <i>LPL</i>      | investigator's interest                   | Yes                    |
| <i>MAPK8IP2</i> | gene member of reduced AMPA               | Yes                    |
| <i>NEUROD6</i>  | gene member of reduced AMPA               | Yes                    |
| <i>NLGN3</i>    | gene member of reduced AMPA               | Yes                    |
| <i>NQO1</i>     | investigator's interest                   | Yes                    |
| <i>NRXN1</i>    | gene member of reduced NMDA, reduced AMPA | Yes                    |
| <i>NRXN2</i>    | gene member of reduced NMDA, reduced AMPA | Yes                    |

**eTable 11 (continued). Full list of genes selected for targeted sequencing**

| Gene            | Reason of being selected                  | Successfully sequenced |
|-----------------|-------------------------------------------|------------------------|
| <i>NRXN3</i>    | gene member of reduced NMDA, reduced AMPA | Yes                    |
| <i>PIWIL4</i>   | investigator's interest                   | No                     |
| <i>PPARGCIA</i> | investigator's interest                   | Yes                    |
| <i>PPP1R9B</i>  | gene member of abnormal AMPA              | No                     |
| <i>ROBO2</i>    | investigator's interest                   | Yes                    |
| <i>RPS6KA3</i>  | gene member of reduced AMPA               | Yes                    |
| <i>SHANK3</i>   | gene member of reduced NMDA               | Yes                    |
| <i>SLC1A1</i>   | investigator's interest                   | Yes                    |
| <i>SLC1A2</i>   | investigator's interest                   | Yes                    |
| <i>SLC1A3</i>   | investigator's interest                   | Yes                    |
| <i>SLC6A3</i>   | investigator's interest                   | Yes                    |
| <i>SLC6A4</i>   | investigator's interest                   | Yes                    |
| <i>TPH1</i>     | investigator's interest                   | Yes                    |
| <i>TPH2</i>     | investigator's interest                   | Yes                    |
| <i>VPS35</i>    | gene member of reduced NMDA, reduced AMPA | Yes                    |
| <i>ZNF804A</i>  | Nominal p-value among candidate examined  | Yes                    |

**eTable 12. The gene-based association results of rare variants (damaging non-synonymous with MAF < 1%) using CMC burden test in follow-up study**

| Gene           | N_INFORMATIVE | NumVar | NumPolyVar | NonRefSite | Pvalue    |
|----------------|---------------|--------|------------|------------|-----------|
| <i>ADARB1</i>  | 1920          | 9      | 9          | 9          | 0.296464  |
| <i>AKAP5</i>   | 1920          | 7      | 7          | 16         | 0.0142277 |
| <i>ARC</i>     | 1920          | 5      | 5          | 5          | 0.406692  |
| <i>BRD2</i>    | 1920          | 21     | 21         | 57         | 0.193989  |
| <i>CACNG2</i>  | 1920          | 2      | 2          | 2          | 0.412468  |
| <i>CACNG7</i>  | 1920          | 3      | 3          | 10         | 0.853472  |
| <i>CACNG8</i>  | 1920          | 2      | 2          | 2          | 0.0823758 |
| <i>CCNE1</i>   | 1920          | 4      | 4          | 4          | 0.145463  |
| <i>CCNE2</i>   | 1920          | 8      | 8          | 9          | 0.92912   |
| <i>CNIH2</i>   | 1920          | 2      | 2          | 2          | 0.624458  |
| <i>CNIH3</i>   | 1920          | 9      | 9          | 11         | 0.116095  |
| <i>CNR1</i>    | 1920          | 13     | 13         | 19         | 0.681797  |
| <i>COMT</i>    | 1920          | 8      | 8          | 11         | 0.092332  |
| <i>CYP1A2</i>  | 1920          | 32     | 32         | 95         | 0.0377687 |
| <i>CYP2C19</i> | 1920          | 22     | 22         | 48         | 0.436555  |
| <i>CYP2D6</i>  | 1920          | 30     | 30         | 74         | 0.899758  |
| <i>CYP2E1</i>  | 1920          | 8      | 8          | 34         | 0.933459  |
| <i>CYP3A4</i>  | 1920          | 11     | 11         | 16         | 0.160225  |
| <i>CYP3A5</i>  | 1920          | 17     | 17         | 77         | 0.621241  |
| <i>CYP3A7</i>  | 1920          | 12     | 12         | 19         | 0.679123  |
| <i>DAPK1</i>   | 1920          | 34     | 34         | 59         | 0.358227  |
| <i>DBH</i>     | 1920          | 34     | 34         | 72         | 0.269967  |

**eTable 12 (continued). The gene-based association results of rare variants (damaging non-synonymous with MAF < 1%) using CMC burden test in follow-up study**

| Gene          | N_INFORMATIVE | NumVar | NumPolyVar | NonRefSite | Pvalue   |
|---------------|---------------|--------|------------|------------|----------|
| <i>DLG4</i>   | 1920          | 9      | 9          | 12         | 0.179597 |
| <i>DRD1</i>   | 1920          | 5      | 5          | 6          | 0.708387 |
| <i>DRD2</i>   | 1920          | 6      | 6          | 7          | 0.779242 |
| <i>DRD3</i>   | 1920          | 7      | 7          | 9          | 0.364234 |
| <i>DRD4</i>   | 1920          | 10     | 9          | 11         | 0.535634 |
| <i>EXT1</i>   | 1920          | 16     | 16         | 27         | 0.493882 |
| <i>FABP7</i>  | 1920          | 7      | 7          | 7          | 0.614972 |
| <i>FAT1</i>   | 1920          | 151    | 149        | 371        | 0.317465 |
| <i>FMO3</i>   | 1920          | 20     | 20         | 76         | 0.191115 |
| <i>FOSB</i>   | 1920          | 9      | 9          | 9          | 0.225116 |
| <i>GHRL</i>   | 1920          | 4      | 4          | 32         | 0.415558 |
| <i>GNB3</i>   | 1920          | 15     | 15         | 17         | 0.984337 |
| <i>GRIA1</i>  | 1920          | 11     | 11         | 14         | 0.964499 |
| <i>GRIA2</i>  | 1920          | 10     | 10         | 21         | 0.59754  |
| <i>GRIA4</i>  | 1920          | 16     | 16         | 20         | 0.366694 |
| <i>GRIN1</i>  | 1920          | 6      | 6          | 7          | 0.885977 |
| <i>GRIN2A</i> | 1920          | 31     | 31         | 66         | 0.667686 |
| <i>GRIN2B</i> | 1920          | 10     | 10         | 15         | 0.852812 |
| <i>GRM3</i>   | 1920          | 15     | 15         | 21         | 0.252392 |
| <i>HTR1A</i>  | 1920          | 4      | 4          | 25         | 0.137462 |

**eTable 12 (continued). The gene-based association results of rare variants (damaging non-synonymous with MAF < 1%) using CMC burden test in follow-up study**

| Gene            | N_INFORMATIVE | NumVar | NumPolyVar | NonRefSite | Pvalue    |
|-----------------|---------------|--------|------------|------------|-----------|
| <i>HTR2A</i>    | 1920          | 5      | 5          | 13         | 0.806531  |
| <i>HTR3A</i>    | 1920          | 21     | 21         | 45         | 0.0525392 |
| <i>HTR6</i>     | 1920          | 8      | 8          | 16         | 0.508206  |
| <i>HTR7</i>     | 1920          | 9      | 8          | 25         | 0.959337  |
| <i>KALRN</i>    | 1920          | 39     | 39         | 47         | 0.0721384 |
| <i>KIF17</i>    | 1920          | 29     | 29         | 67         | 0.997782  |
| <i>LEP</i>      | 1920          | 8      | 8          | 23         | 0.437189  |
| <i>LEPR</i>     | 1920          | 15     | 15         | 16         | 0.998862  |
| <i>LPL</i>      | 1920          | 13     | 13         | 13         | 0.117307  |
| <i>MAPK8IP2</i> | 1920          | 11     | 11         | 17         | 0.421053  |
| <i>NEUROD6</i>  | 1920          | 9      | 9          | 12         | 0.87706   |
| <i>NQO1</i>     | 1920          | 10     | 10         | 19         | 0.921827  |
| <i>NRXN1</i>    | 1920          | 44     | 44         | 88         | 0.147845  |
| <i>NRXN2</i>    | 1920          | 30     | 29         | 65         | 0.103387  |
| <i>NRXN3</i>    | 1920          | 28     | 28         | 43         | 0.733983  |
| <i>PIWIL4</i>   | 1920          | 21     | 20         | 34         | 0.174145  |
| <i>PPARGCIA</i> | 1920          | 31     | 30         | 30         | 0.945895  |
| <i>ROBO2</i>    | 1920          | 32     | 32         | 49         | 0.222207  |
| <i>SHANK3</i>   | 1920          | 24     | 24         | 37         | 0.385764  |
| <i>SLC1A1</i>   | 1920          | 10     | 10         | 11         | 0.748195  |

**eTable 12 (continued). The gene-based association results of rare variants (damaging non-synonymous with MAF < 1%) using CMC burden test in follow-up study**

| Gene           | N_INFORMATIVE | NumVar | NumPolyVar | NonRefSite | Pvalue    |
|----------------|---------------|--------|------------|------------|-----------|
| <i>SLC1A2</i>  | 1920          | 14     | 14         | 20         | 0.642723  |
| <i>SLC1A3</i>  | 1920          | 12     | 12         | 23         | 0.0239278 |
| <i>SLC6A3</i>  | 1920          | 9      | 9          | 19         | 0.25645   |
| <i>SLC6A4</i>  | 1920          | 9      | 9          | 22         | 0.344269  |
| <i>TPH1</i>    | 1920          | 16     | 16         | 23         | 0.686267  |
| <i>TPH2</i>    | 1920          | 18     | 18         | 35         | 0.821772  |
| <i>VPS35</i>   | 1920          | 7      | 7          | 10         | 0.981706  |
| <i>ZNF804A</i> | 1920          | 19     | 19         | 45         | 0.979811  |



**eTable 13. Information about variants identified in the reduced NMDA-mediated synaptic current in the follow-up study**

| CHR | POS      | REF/<br>ALT | rsID            | Gene  | Variant  | RefGeneFeatures                                                                                                          | MAF_dis   | Causal<br>_KGGSeq | Prediction_other                 |
|-----|----------|-------------|-----------------|-------|----------|--------------------------------------------------------------------------------------------------------------------------|-----------|-------------------|----------------------------------|
| 1   | 20991117 | C/T         | rs3774439<br>85 | KIF17 | missense | KIF17:NM_001122819(15Exons):exon15:c.G3047A:p.R1016H&missense;KIF17:NM_020816(15Exons):exon15:c.G3050A:p.R1017H&missense | 0.0005149 | Y                 | A;B;C;D;E;F:0.0484:0.828:0.792   |
| 1   | 20991243 | G/A         | rs3761840<br>55 | KIF17 | missense | KIF17:NM_001122819(15Exons):exon15:c.C2921T:p.S974L&missense;KIF17:NM_020816(15Exons):exon15:c.C2924T:p.S975L&missense   | 0.0002575 | Y                 | A;B;C;D;E;H;F:0.0432:0.844:0.773 |
| 1   | 20996913 | C/T         | ID42            | KIF17 | splicing | KIF17:NM_001122819(15Exons):3splicing13+1;KIF17:NM_020816(15Exons):3splicing13+1                                         | 0.0007724 | Y                 | B;D;H;F:0.0414:0.84:0.742        |
| 1   | 20998491 | C/T         | rs1419858<br>68 | KIF17 | missense | KIF17:NM_001122819(15Exons):exon12:c.G2662A:p.E888K&missense;KIF17:NM_020816(15Exons):exon12:c.G2662A:p.E888K&missense   | 0.001287  | Y                 | A;B;C;D;E;F:0.0484:0.828:0.792   |
| 1   | 20998508 | C/T         | rs3423286<br>4  | KIF17 | missense | KIF17:NM_001122819(15Exons):exon12:c.G2645A:p.R882H&missense;KIF17:NM_020816(15Exons):exon12:c.G2645A:p.R882H&missense   | 0.0002575 | Y                 | A;G;B;C;D;E;F:0.0494:0.825:0.796 |

**eTable 13 (continued). Information about variants identified in the reduced NMDA-mediated synaptic current in the follow-up study**

| CHR | POS      | REF/<br>ALT | rsID            | Gene  | Variant  | RefGeneFeatures                                                                                                        | MAF_dis   | Causal<br>_KGGSeq | Prediction_other               |
|-----|----------|-------------|-----------------|-------|----------|------------------------------------------------------------------------------------------------------------------------|-----------|-------------------|--------------------------------|
| 1   | 20998568 | T/A         | rs1139958<br>71 | KIF17 | missense | KIF17:NM_001122819(15Exons):exon12:c.A2585T:p.E862V&missense;KIF17:NM_020816(15Exons):exon12:c.A2585T:p.E862V&missense | 0.001287  | Y                 | A;B;C;D;E;F:0.0484:0.828:0.792 |
| 1   | 20998598 | C/T         | rs1395177<br>26 | KIF17 | missense | KIF17:NM_001122819(15Exons):exon12:c.G2555A:p.R852H&missense;KIF17:NM_020816(15Exons):exon12:c.G2555A:p.R852H&missense | 0.0002575 | Y                 | A;B;C;D;E;F:0.0484:0.828:0.792 |
| 1   | 21009184 | G/A         | rs1145452<br>84 | KIF17 | missense | KIF17:NM_001122819(15Exons):exon11:c.C2425T:p.R809W&missense;KIF17:NM_020816(15Exons):exon11:c.C2425T:p.R809W&missense | 0.0002575 | Y                 | A;B;E;H;F;I:0.0287:0.885:0.676 |
| 1   | 21009232 | C/T         | rs2008444<br>82 | KIF17 | missense | KIF17:NM_001122819(15Exons):exon11:c.G2377A:p.G793R&missense;KIF17:NM_020816(15Exons):exon11:c.G2377A:p.G793R&missense | 0.0002575 | Y                 | A;B;C;D;E;F:0.0484:0.828:0.792 |
| 1   | 21009252 | T/G         | ID51            | KIF17 | missense | KIF17:NM_001122819(15Exons):exon11:c.A2357C:p.Q786P&missense;KIF17:NM_020816(15Exons):exon11:c.A2357C:p.Q786P&missense | 0.0002575 | Y                 | A;B;C;D;E;F:0.0484:0.828:0.792 |
|     |          |             |                 |       |          |                                                                                                                        |           |                   |                                |

**eTable 13 (continued). Information about variants identified in the reduced NMDA-mediated synaptic current in the follow-up study**

| CHR | POS      | REF/<br>ALT | rsID            | Gene  | Variant  | RefGeneFeatures                                                                                                        | MAF_dis   | Causal<br>_KGGSeq | Prediction_other                    |
|-----|----------|-------------|-----------------|-------|----------|------------------------------------------------------------------------------------------------------------------------|-----------|-------------------|-------------------------------------|
| 1   | 21009286 | C/A         | rs1163674<br>30 | KIF17 | missense | KIF17:NM_001122819(15Exons):exon11:c.G2323T:p.D775Y&missense;KIF17:NM_020816(15Exons):exon11:c.G2323T:p.D775Y&missense | 0.0002575 | Y                 | A;B;C;D;E;F:0.0484:0.828:0.792      |
| 1   | 21009289 | C/T         | ID52            | KIF17 | missense | KIF17:NM_001122819(15Exons):exon11:c.G2320A:p.A774T&missense;KIF17:NM_020816(15Exons):exon11:c.G2320A:p.A774T&missense | 0.0002575 | Y                 | A;B;C;D;E;F:0.0484:0.828:0.792      |
| 1   | 21011440 | T/G         | rs1397425<br>96 | KIF17 | missense | KIF17:NM_001122819(15Exons):exon10:c.A2093C:p.Q698P&missense;KIF17:NM_020816(15Exons):exon10:c.A2093C:p.Q698P&missense | 0.004797  | Y                 | A;B;E;H;F;I:0.0287:0.885:0.676      |
| 1   | 21016692 | C/T         | rs1862463<br>58 | KIF17 | missense | KIF17:NM_001122819(15Exons):exon7:c.G1370A:p.R457Q&missense;KIF17:NM_020816(15Exons):exon7:c.G1370A:p.R457Q&missense   | 0.0002575 | Y                 | B;C;H;I:0.0386:0.854:0.72           |
| 1   | 21016693 | G/A         | ID79            | KIF17 | missense | KIF17:NM_001122819(15Exons):exon7:c.C1369T:p.R457W&missense;KIF17:NM_020816(15Exons):exon7:c.C1369T:p.R457W&missense   | 0.0002575 | Y                 | A;LRT_score;B;H;F:0.037:0.846:0.715 |

**eTable 13 (continued). Information about variants identified in the reduced NMDA-mediated synaptic current in the follow-up study**

| CHR | POS      | REF/<br>ALT | rsID        | Gene  | Variant  | RefGeneFeatures                                                                                                      | MAF_dis   | Causal<br>_KGGSeq | Prediction_other               |
|-----|----------|-------------|-------------|-------|----------|----------------------------------------------------------------------------------------------------------------------|-----------|-------------------|--------------------------------|
| 1   | 21016710 | G/A         | ID81        | KIF17 | missense | KIF17:NM_001122819(15Exons):exon7:c.C1352T;p.T451M&missense;KIF17:NM_020816(15Exons):exon7:c.C1352T;p.T451M&missense | 0.0005149 | Y                 | B;C;H;I:0.0386:0.854:0.72      |
| 1   | 21024892 | C/T         | rs199771446 | KIF17 | missense | KIF17:NM_001122819(15Exons):exon6:c.G1213A;p.E405K&missense;KIF17:NM_020816(15Exons):exon6:c.G1213A;p.E405K&missense | 0.002317  | Y                 | A;B;C;D;H;I:0.046:0.839:0.761  |
| 1   | 21024922 | G/A         | ID93        | KIF17 | stopgain | KIF17:NM_001122819(15Exons):exon6:c.C1183T;p.Q395*&stopgain;KIF17:NM_020816(15Exons):exon6:c.C1183T;p.Q395*&stopgain | 0.0005149 | Y                 | B;D;H;F:0.0414:0.84:0.742      |
| 1   | 21031011 | C/T         | rs374159508 | KIF17 | missense | KIF17:NM_001122819(15Exons):exon5:c.G1052A;p.R351H&missense;KIF17:NM_020816(15Exons):exon5:c.G1052A;p.R351H&missense | 0.0002575 | Y                 | A;B;C;D;E;F:0.0484:0.828:0.792 |
| 1   | 21031039 | T/G         | ID95        | KIF17 | missense | KIF17:NM_001122819(15Exons):exon5:c.A1024C;p.N342H&missense;KIF17:NM_020816(15Exons):exon5:c.A1024C;p.N342H&missense | 0.0005149 | Y                 | A;B;C;D;E;F:0.0484:0.828:0.792 |
| 1   | 21031159 | C/T         | rs142534674 | KIF17 | missense | KIF17:NM_001122819(15Exons):exon5:c.G904A;p.G302S&missense;KIF17:NM_020816(15Exons):exon5:c.G904A;p.G302S&missense   | 0.0002575 | Y                 | A;B;C;D;E;F:0.0484:0.828:0.792 |

**eTable 13 (continued). Information about variants identified in the reduced NMDA-mediated synaptic current in the follow-up study**

| CHR | POS      | REF/<br>ALT | rsID  | Gene  | Variant  | RefGeneFeatures                                                                                                    | MAF_dis   | Causal<br>_KGGSeq | Prediction_other               |
|-----|----------|-------------|-------|-------|----------|--------------------------------------------------------------------------------------------------------------------|-----------|-------------------|--------------------------------|
| 1   | 21031266 | G/A         | ID99  | KIF17 | missense | KIF17:NM_001122819(15Exons):exon5:c.C797T:p.S266L&missense;KIF17:NM_020816(15Exons):exon5:c.C797T:p.S266L&missense | 0.0002575 | Y                 | A;B;C;D;E;F:0.0484:0.828:0.792 |
| 1   | 21031326 | C/T         | ID101 | KIF17 | missense | KIF17:NM_001122819(15Exons):exon5:c.G737A:p.R246Q&missense;KIF17:NM_020816(15Exons):exon5:c.G737A:p.R246Q&missense | 0.0002575 | Y                 | A;B;C;D;E;F:0.0484:0.828:0.792 |
| 1   | 21031330 | C/T         | ID102 | KIF17 | missense | KIF17:NM_001122819(15Exons):exon5:c.G733A:p.E245K&missense;KIF17:NM_020816(15Exons):exon5:c.G733A:p.E245K&missense | 0.0002575 | Y                 | A;B;C;D;E;F:0.0484:0.828:0.792 |
| 1   | 21036173 | G/A         | ID109 | KIF17 | missense | KIF17:NM_001122819(15Exons):exon4:c.C629T:p.S210L&missense;KIF17:NM_020816(15Exons):exon4:c.C629T:p.S210L&missense | 0.0002575 | Y                 | A;B;C;D;E;F:0.0484:0.828:0.792 |
| 1   | 21036290 | A/G         | ID110 | KIF17 | missense | KIF17:NM_001122819(15Exons):exon4:c.T512C:p.V171A&missense;KIF17:NM_020816(15Exons):exon4:c.T512C:p.V171A&missense | 0.0002575 | Y                 | A;B;C;D;E;F:0.0484:0.828:0.792 |
| 1   | 21039972 | C/T         | ID113 | KIF17 | missense | KIF17:NM_001122819(15Exons):exon3:c.G455A:p.G152E&missense;KIF17:NM_020816(15Exons):exon3:c.G455A:p.G152E&missense | 0.0002575 | Y                 | A;C;D;F:0.0381:0.86:0.752      |
| 1   | 21039996 | T/C         | ID114 | KIF17 | missense | KIF17:NM_001122819(15Exons):exon3:c.A431G:p.N144S&missense;KIF17:NM_020816(15Exons):exon3:c.A431G:p.N144S&missense | 0.0002575 | Y                 | A;B;C;D;E;F:0.0484:0.828:0.792 |

**eTable 13 (continued). Information about variants identified in the reduced NMDA-mediated synaptic current in the follow-up study**

| CHR | POS      | REF/<br>ALT | rsID   | Gene  | Variant  | RefGeneFeatures                                                                                                                                                               | MAF_dis   | Causal<br>_KGGSeq | Prediction_other               |
|-----|----------|-------------|--------|-------|----------|-------------------------------------------------------------------------------------------------------------------------------------------------------------------------------|-----------|-------------------|--------------------------------|
| 1   | 21040020 | C/T         | ID116  | KIF17 | missense | KIF17:NM_001122819(15Exons):exon3:c.G407A:p.R136Q&missense;KIF17:NM_020816(15Exons):exon3:c.G407A:p.R136Q&missense                                                            | 0.0005149 | Y                 | A;B;C;D;E;F:0.0484:0.828:0.792 |
| 11  | 64375368 | T/A         | ID2445 | NRXN2 | missense | NRXN2:NM_138732(20Exons):exon20:c.A4229T:p.E1410V&missense;NRXN2:NM_015080(23Exons):exon23:c.A4439T:p.E1480V&missense;NRXN2:NM_138734(7Exons):exon7:c.A1301T:p.E434V&missense | 0.0002575 | Y                 | A;D;H:0.0506:0.84:0.741        |
| 11  | 64375369 | C/A         | ID2446 | NRXN2 | stopgain | NRXN2:NM_138732(20Exons):exon20:c.G4228T:p.E1410*&stopgain;NRXN2:NM_015080(23Exons):exon23:c.G4438T:p.E1480*&stopgain;NRXN2:NM_138734(7Exons):exon7:c.G1300T:p.E434*&stopgain | 0.0002575 | Y                 | A;B;D;F:0.0324:0.877:0.706     |
| 11  | 64375399 | G/A         | ID2448 | NRXN2 | missense | NRXN2:NM_138732(20Exons):exon20:c.C4198T:p.R1400C&missense;NRXN2:NM_015080(23Exons):exon23:c.C4408T:p.R1470C&missense;NRXN2:NM_138734(7Exons):exon7:c.C1270T:p.R424C&missense | 0.0002575 | Y                 | A;G;B;F:0.0385:0.849:0.732     |

**eTable 13 (continued). Information about variants identified in the reduced NMDA-mediated synaptic current in the follow-up study**

| CHR | POS      | REF/<br>ALT | rsID        | Gene  | Variant  | RefGeneFeatures                                                                                                                                                              | MAF_dis   | Causal<br>_KGGSeq | Prediction_other               |
|-----|----------|-------------|-------------|-------|----------|------------------------------------------------------------------------------------------------------------------------------------------------------------------------------|-----------|-------------------|--------------------------------|
| 11  | 64390305 | T/C         | ID2463      | NRXN2 | missense | NRXN2:NM_138732(20Exons):exon18:c.A3883G;p.I1295V&missense;NRXN2:NM_015080(23Exons):exon21:c.A4093G;p.I1365V&missense;NRXN2:NM_138734(7Exons):exon5:c.A955G;p.I319V&missense | 0.0005149 | Y                 | K;G;B;C;D;H:0.0478:0.829:0.769 |
| 11  | 64390433 | G/A         | rs375639642 | NRXN2 | missense | NRXN2:NM_138732(20Exons):exon18:c.C3755T;p.A1252V&missense;NRXN2:NM_015080(23Exons):exon21:c.C3965T;p.A1322V&missense;NRXN2:NM_138734(7Exons):exon5:c.C827T;p.A276V&missense | 0.0002575 | Y                 | A;D;E;F:0.0413:0.843:0.755     |
| 11  | 64398035 | G/A         | ID2473      | NRXN2 | missense | NRXN2:NM_138732(20Exons):exon17:c.C3476T;p.T1159I&missense;NRXN2:NM_015080(23Exons):exon19:c.C3596T;p.T1199I&missense;NRXN2:NM_138734(7Exons):exon3:c.C458T;p.T153I&missense | 0.0002575 | Y                 | A;D;E;F:0.0413:0.843:0.755     |
| 11  | 64402807 | C/T         | ID2475      | NRXN2 | missense | NRXN2:NM_138732(20Exons):exon16:c.G3401A;p.R1134Q&missense;NRXN2:NM_015080(23Exons):exon18:c.G3521A;p.R1174Q&missense;NRXN2:NM_138734(7Exons):exon2:c.G383A;p.R128Q&missense | 0.0005149 | Y                 | A;D;E;F:0.0413:0.843:0.755     |

**eTable 13 (continued). Information about variants identified in the reduced NMDA-mediated synaptic current in the follow-up study**

| CHR | POS      | REF/<br>ALT | rsID            | Gene  | Variant  | RefGeneFeatures                                                                                                                                                              | MAF_dis   | Causal<br>_KGGSeq | Prediction_other               |
|-----|----------|-------------|-----------------|-------|----------|------------------------------------------------------------------------------------------------------------------------------------------------------------------------------|-----------|-------------------|--------------------------------|
| 11  | 64402864 | T/C         | rs3701080<br>57 | NRXN2 | missense | NRXN2:NM_138732(20Exons):exon16:c.A3344G:p.N1115S&missense;NRXN2:NM_015080(23Exons):exon18:c.A3464G:p.N1155S&missense;NRXN2:NM_138734(7Exons):exon2:c.A326G:p.N109S&missense | 0.0005149 | Y                 | A;B;J;F:0.0313:0.936:0.894     |
| 11  | 64415766 | C/T         | ID2482          | NRXN2 | missense | NRXN2:NM_138732(20Exons):exon15:c.G3208A:p.V1070I&missense;NRXN2:NM_015080(23Exons):exon17:c.G3328A:p.V1110I&missense                                                        | 0.0002575 | Y                 | B;C;D;F:0.0435:0.843:0.771     |
| 11  | 64416245 | C/T         | ID2486          | NRXN2 | missense | NRXN2:NM_138732(20Exons):exon14:c.G3124A:p.A1042T&missense;NRXN2:NM_015080(23Exons):exon16:c.G3244A:p.A1082T&missense                                                        | 0.0002575 | Y                 | A;B;C;D;E;F:0.0484:0.828:0.792 |
| 11  | 64418931 | T/C         | ID2494          | NRXN2 | missense | NRXN2:NM_138732(20Exons):exon12:c.A2594G;p.E865G&missense;NRXN2:NM_015080(23Exons):exon14:c.A2714G;p.E905G&missense                                                          | 0.0002575 | Y                 | A;B;C;D;E;F:0.0484:0.828:0.792 |
| 11  | 64428001 | G/A         | ID2522          | NRXN2 | missense | NRXN2:NM_138732(20Exons):exon10:c.C2099T;p.T700M&missense;NRXN2:NM_015080(23Exons):exon11:c.C2192T;p.T731M&missense                                                          | 0.0002575 | Y                 | A;B;C;D;E;F:0.0484:0.828:0.792 |



**eTable 13 (continued). Information about variants identified in the reduced NMDA-mediated synaptic current in the follow-up study**

| CHR | POS      | REF/<br>ALT | rsID           | Gene  | Variant  | RefGeneFeatures                                                                                                    | MAF_dis   | Causal<br>_KGGSeq | Prediction_other                     |
|-----|----------|-------------|----------------|-------|----------|--------------------------------------------------------------------------------------------------------------------|-----------|-------------------|--------------------------------------|
| 11  | 64428239 | C/T         | rs7292700<br>4 | NRXN2 | missense | NRXN2:NM_138732(20Exons):exon9:c.G2078A:p.R693Q&missense;NRXN2:NM_015080(23Exons):exon10:c.G2171A:p.R724Q&missense | 0.0007724 | Y                 | G;B;D;F:0.0309:0.881:0.696           |
| 11  | 64428252 | C/T         | ID2523         | NRXN2 | missense | NRXN2:NM_138732(20Exons):exon9:c.G2065A:p.G689S&missense;NRXN2:NM_015080(23Exons):exon10:c.G2158A:p.G720S&missense | 0.0002575 | Y                 | A;B;C;D;E;F:0.0484:0.828:0.792       |
| 11  | 64428287 | C/A         | ID2524         | NRXN2 | missense | NRXN2:NM_138732(20Exons):exon9:c.G2030T:p.G677V&missense;NRXN2:NM_015080(23Exons):exon10:c.G2123T:p.G708V&missense | 0.0002575 | Y                 | A;B;C;D;E;F:0.0484:0.828:0.792       |
| 11  | 64428398 | C/T         | ID2526         | NRXN2 | missense | NRXN2:NM_138732(20Exons):exon9:c.G1919A:p.R640Q&missense;NRXN2:NM_015080(23Exons):exon10:c.G2012A:p.R671Q&missense | 0.0002575 | Y                 | A;G;B;C;J;D;E;H;F:0.0283:0.944:0.891 |
| 11  | 64428447 | C/G         | ID2527         | NRXN2 | missense | NRXN2:NM_138732(20Exons):exon9:c.G1870C:p.V624L&missense;NRXN2:NM_015080(23Exons):exon10:c.G1963C:p.V655L&missense | 0.0005149 | Y                 | A;B;C;D;E;F:0.0484:0.828:0.792       |

**eTable 13 (continued). Information about variants identified in the reduced NMDA-mediated synaptic current in the follow-up study**

| CHR | POS      | REF/<br>ALT | rsID        | Gene  | Variant  | RefGeneFeatures                                                                                                    | MAF_dis   | Causal<br>_KGGSeq | Prediction_other                       |
|-----|----------|-------------|-------------|-------|----------|--------------------------------------------------------------------------------------------------------------------|-----------|-------------------|----------------------------------------|
| 11  | 64428458 | C/A         | ID2528      | NRXN2 | missense | NRXN2:NM_138732(20Exons):exon9:c.G1859T:p.R620L&missense;NRXN2:NM_015080(23Exons):exon10:c.G1952T:p.R651L&missense | 0.0002575 | Y                 | A;K;G;B;C;D;E;H:0.0491:0.827:0.776     |
| 11  | 64428501 | C/A         | ID2529      | NRXN2 | missense | NRXN2:NM_138732(20Exons):exon9:c.G1816T:p.V606L&missense;NRXN2:NM_015080(23Exons):exon10:c.G1909T:p.V637L&missense | 0.0002575 | Y                 | A;D;H:0.0506:0.84:0.741                |
| 11  | 64434956 | G/A         | rs201258323 | NRXN2 | missense | NRXN2:NM_138732(20Exons):exon8:c.C1471T:p.R491C&missense;NRXN2:NM_015080(23Exons):exon9:c.C1564T:p.R522C&missense  | 0.0002575 | Y                 | A;B;C;D;E;F:0.0484:0.828:0.792         |
| 11  | 64434980 | T/C         | ID2534      | NRXN2 | missense | NRXN2:NM_138732(20Exons):exon8:c.A1447G:p.T483A&missense;NRXN2:NM_015080(23Exons):exon9:c.A1540G:p.T514A&missense  | 0.0002575 | Y                 | A;LRT_score;B;E;H;F:0.0325:0.867:0.686 |
| 11  | 64434997 | C/T         | rs140588352 | NRXN2 | missense | NRXN2:NM_138732(20Exons):exon8:c.G1430A:p.R477H&missense;NRXN2:NM_015080(23Exons):exon9:c.G1523A:p.R508H&missense  | 0.0002575 | Y                 | G;B;C;D;H:0.0541:0.817:0.783           |

**eTable 13 (continued). Information about variants identified in the reduced NMDA-mediated synaptic current in the follow-up study**

| CHR | POS      | REF/<br>ALT | rsID            | Gene  | Variant  | RefGeneFeatures                                                                                                   | MAF_dis   | Causal<br>_KGGSeq | Prediction_other            |
|-----|----------|-------------|-----------------|-------|----------|-------------------------------------------------------------------------------------------------------------------|-----------|-------------------|-----------------------------|
| 11  | 64435006 | G/A         | rs2003349<br>93 | NRXN2 | missense | NRXN2:NM_138732(20Exons):exon8:c.C1421T:p.A474V&missense;NRXN2:NM_015080(23Exons):exon9:c.C1514T:p.A505V&missense | 0.0007724 | Y                 | K;B;D;F:0.0325:0.873:0.687  |
| 11  | 64435078 | T/A         | rs3762398<br>89 | NRXN2 | missense | NRXN2:NM_138732(20Exons):exon8:c.A1349T:p.D450V&missense;NRXN2:NM_015080(23Exons):exon9:c.A1442T:p.D481V&missense | 0.001287  | Y                 | K;B;J;D:0.028:0.942:0.879   |
| 11  | 64436045 | G/A         | ID2537          | NRXN2 | missense | NRXN2:NM_138732(20Exons):exon7:c.C1136T:p.T379I&missense;NRXN2:NM_015080(23Exons):exon8:c.C1229T:p.T410I&missense | 0.00027   | Y                 | B;C;D;F:0.0435:0.843:0.771  |
| 11  | 64457922 | C/A         | ID2554          | NRXN2 | missense | NRXN2:NM_138732(20Exons):intron4;NRXN2:NM_015080(23Exons):exon5:c.G805T:p.G269W&missense                          | 0.0002575 | Y                 | A;D;E;F:0.0413:0.843:0.755  |
| 11  | 64480473 | G/C         | ID2571          | NRXN2 | missense | NRXN2:NM_138732(20Exons):exon2:c.C699G:p.H233Q&missense;NRXN2:NM_015080(23Exons):exon2:c.C699G:p.H233Q&missense   | 0.006959  | Y                 | A;B;C;J;F:0.0275:0.943:0.89 |
| 11  | 64480595 | C/T         | ID2575          | NRXN2 | missense | NRXN2:NM_138732(20Exons):exon2:c.G577A:p.G193S&missense;NRXN2:NM_015080(23Exons):exon2:c.G577A:p.G193S&missense   | 0.0002584 | Y                 | B;J:0.023:0.938:0.858       |

**eTable 13 (continued). Information about variants identified in the reduced NMDA-mediated synaptic current in the follow-up study**

| CHR | POS      | REF/<br>ALT | rsID            | Gene  | Variant  | RefGeneFeatures                                                                                                 | MAF_dis   | Causal<br>_KGGSeq | Prediction_other                 |
|-----|----------|-------------|-----------------|-------|----------|-----------------------------------------------------------------------------------------------------------------|-----------|-------------------|----------------------------------|
| 11  | 64480718 | C/T         | ID2578          | NRXN2 | missense | NRXN2:NM_138732(20Exons):exon2:c.G454A:p.V152M&missense;NRXN2:NM_015080(23Exons):exon2:c.G454A:p.V152M&missense | 0.000258  | Y                 | A;B;C;D;E;H;F:0.0432:0.844:0.773 |
| 11  | 64480829 | C/A         | ID2580          | NRXN2 | missense | NRXN2:NM_138732(20Exons):exon2:c.G343T:p.V115L&missense;NRXN2:NM_015080(23Exons):exon2:c.G343T:p.V115L&missense | 0.000258  | Y                 | B;D;H;F;I:0.0292:0.883:0.683     |
| 14  | 79175584 | C/T         | ID2990          | NRXN3 | missense | NRXN3:NR_073547(21Exons):ncRNA;NRXN3:NM_004796(17Exons):exon4:c.C127T:p.R43C&missense                           | 0.0002575 | Y                 | B;D;H;F:0.0414:0.84:0.742        |
| 14  | 79175600 | G/A         | ID2991          | NRXN3 | missense | NRXN3:NR_073547(21Exons):ncRNA;NRXN3:NM_004796(17Exons):exon4:c.G143A:p.R48H&missense                           | 0.0002575 | Y                 | B;D;H;F:0.0414:0.84:0.742        |
| 14  | 79175723 | A/G         | ID2994          | NRXN3 | missense | NRXN3:NR_073547(21Exons):ncRNA;NRXN3:NM_004796(17Exons):exon4:c.A266G:p.K89R&missense                           | 0.0002575 | Y                 | G;B;C;E;H;F;I:0.0411:0.848:0.763 |
| 14  | 79175765 | G/T         | rs1995433<br>20 | NRXN3 | missense | NRXN3:NR_073547(21Exons):ncRNA;NRXN3:NM_004796(17Exons):exon4:c.G308T:p.R103L&missense                          | 0.0002575 | Y                 | B;C;D;F:0.0435:0.843:0.771       |
| 14  | 79175899 | C/T         | ID2995          | NRXN3 | missense | NRXN3:NR_073547(21Exons):ncRNA;NRXN3:NM_004796(17Exons):exon4:c.C442T:p.L148F&missense                          | 0.0002575 | Y                 | B;D;H;F:0.0414:0.84:0.742        |

**eTable 13 (continued). Information about variants identified in the reduced NMDA-mediated synaptic current in the follow-up study**

| CHR | POS      | REF/<br>ALT | rsID   | Gene  | Variant  | RefGeneFeatures                                                                            | MAF_dis   | Causal<br>_KGGSeq | Prediction_other           |
|-----|----------|-------------|--------|-------|----------|--------------------------------------------------------------------------------------------|-----------|-------------------|----------------------------|
| 14  | 79175905 | A/G         | ID2996 | NRXN3 | missense | NRXN3:NR_073547(21Exons):ncRNA;NRXN3:N3:NM_004796(17Exons):exon4:c.A448G:p.M150V&missense  | 0.0002575 | Y                 | B;C;D;F:0.0435:0.843:0.771 |
| 14  | 79181440 | G/A         | ID2998 | NRXN3 | missense | NRXN3:NR_073547(21Exons):ncRNA;NRXN3:N3:NM_004796(17Exons):exon5:c.G883A:p.D295N&missense  | 0.0002575 | Y                 | B;D;H;F:0.0414:0.84:0.742  |
| 14  | 79270043 | G/A         | ID3000 | NRXN3 | missense | NRXN3:NR_073547(21Exons):ncRNA;NRXN3:N3:NM_004796(17Exons):exon6:c.G1006A:p.V336M&missense | 0.0002575 | Y                 | B;D;H;F:0.0414:0.84:0.742  |
| 14  | 79270103 | G/A         | ID3001 | NRXN3 | missense | NRXN3:NR_073547(21Exons):ncRNA;NRXN3:N3:NM_004796(17Exons):exon6:c.G1066A:p.D356N&missense | 0.0002575 | Y                 | B;D;H;F:0.0414:0.84:0.742  |
| 14  | 79423698 | G/A         | ID3017 | NRXN3 | missense | NRXN3:NR_073547(21Exons):ncRNA;NRXN3:N3:NM_004796(17Exons):exon8:c.G1270A:p.A424T&missense | 0.0002575 | Y                 | B;D;H;F:0.0414:0.84:0.742  |
| 14  | 79432407 | A/G         | ID3018 | NRXN3 | missense | NRXN3:NR_073547(21Exons):ncRNA;NRXN3:N3:NM_004796(17Exons):exon9:c.A1316G:p.N439S&missense | 0.0002575 | Y                 | B;D;H;F:0.0414:0.84:0.742  |
| 14  | 79432508 | A/G         | ID3020 | NRXN3 | missense | NRXN3:NR_073547(21Exons):ncRNA;NRXN3:N3:NM_004796(17Exons):exon9:c.A1417G:p.I473V&missense | 0.000516  | Y                 | B;D;H;F:0.0414:0.84:0.742  |

**eTable 13 (continued). Information about variants identified in the reduced NMDA-mediated synaptic current in the follow-up study**

| CHR | POS      | REF/<br>ALT | rsID        | Gene  | Variant  | RefGeneFeatures                                                                          | MAF_dis   | Causal<br>_KGGSeq | Prediction_other             |
|-----|----------|-------------|-------------|-------|----------|------------------------------------------------------------------------------------------|-----------|-------------------|------------------------------|
| 14  | 79433612 | C/T         | ID3030      | NRXN3 | missense | NRXN3:NR_073547(21Exons):ncRNA;NRXN3:NM_004796(17Exons):exon10:c.C1720T:p.R574C&missense | 0.0002575 | Y                 | B;D;H;F:0.0414:0.84:0.742    |
| 14  | 79433613 | G/A         | rs140528152 | NRXN3 | missense | NRXN3:NR_073547(21Exons):ncRNA;NRXN3:NM_004796(17Exons):exon10:c.G1721A:p.R574H&missense | 0.001545  | Y                 | B;D;H;F:0.0414:0.84:0.742    |
| 14  | 79433645 | G/A         | rs186034014 | NRXN3 | missense | NRXN3:NR_073547(21Exons):ncRNA;NRXN3:NM_004796(17Exons):exon10:c.G1753A:p.V585I&missense | 0.0002575 | Y                 | B;D;H;F:0.0414:0.84:0.742    |
| 14  | 79434660 | G/A         | rs151072919 | NRXN3 | missense | NRXN3:NR_073547(21Exons):ncRNA;NRXN3:NM_004796(17Exons):exon11:c.G1994A:p.R665Q&missense | 0.00206   | Y                 | B;D;H;F:0.0414:0.84:0.742    |
| 14  | 79454415 | A/G         | ID3035      | NRXN3 | missense | NRXN3:NR_073547(21Exons):ncRNA;NRXN3:NM_004796(17Exons):exon12:c.A2074G:p.M692V&missense | 0.0002575 | Y                 | B;J;E;H;F:0.0339:0.929:0.895 |

**eTable 13 (continued). Information about variants identified in the reduced NMDA-mediated synaptic current in the follow-up study**

| CHR | POS      | REF/<br>ALT | rsID   | Gene  | Variant  | RefGeneFeatures                                                                                                                                                                                                                                                                                   | MAF_dis   | Causal<br>_KGGSeq | Prediction_other                |
|-----|----------|-------------|--------|-------|----------|---------------------------------------------------------------------------------------------------------------------------------------------------------------------------------------------------------------------------------------------------------------------------------------------------|-----------|-------------------|---------------------------------|
| 14  | 80130283 | T/C         | ID3041 | NRXN3 | missense | NRXN3:NR_073546(8Exons):ncRNA;NRXN3:NR_073547(21Exons):ncRNA;NRXN3:NM_001105250(7Exons):exon3:c.T592C:p.Y198H&missense;NRXN3:NM_138970(6Exons):exon3:c.T592C:p.Y198H&missense;NRXN3:NM_001272020(6Exons):exon3:c.T592C:p.Y198H&missense;NRXN3:NM_004796(17Exons):exon14:c.T2488C:p.Y830H&missense | 0.0005149 | Y                 | B;C;D;F:0.0435:0.843:0.771      |
| 14  | 80158519 | A/T         | ID3044 | NRXN3 | missense | NRXN3:NR_073546(8Exons):ncRNA;NRXN3:NR_073547(21Exons):ncRNA;NRXN3:NM_138970(6Exons):intronic3;NRXN3:NM_001272020(6Exons):intronic3;NRXN3:NM_004796(17Exons):intronic14;NRXN3:NM_001105250(7Exons):exon4:c.A605T:p.N202I&missense                                                                 | 0.0002575 | Y                 | G;B;J;D;E;H;F:0.0311:0.938:0.89 |

**eTable 13 (continued). Information about variants identified in the reduced NMDA-mediated synaptic current in the follow-up study**

| CHR | POS      | REF/<br>ALT | rsID   | Gene  | Variant  | RefGeneFeatures                                                                                                                                                                                                                                                                                   | MAF_dis   | Causal<br>_KGGSeq | Prediction_other               |
|-----|----------|-------------|--------|-------|----------|---------------------------------------------------------------------------------------------------------------------------------------------------------------------------------------------------------------------------------------------------------------------------------------------------|-----------|-------------------|--------------------------------|
| 14  | 80164026 | G/C         | ID3048 | NRXN3 | missense | NRXN3:NR_073546(8Exons):ncRNA;NRXN3:NR_073547(21Exons):ncRNA;NRXN3:NM_001105250(7Exons):exon5:c.G745C:p.D249H&missense;NRXN3:NM_138970(6Exons):exon4:c.G655C:p.D219H&missense;NRXN3:NM_001272020(6Exons):exon4:c.G655C:p.D219H&missense;NRXN3:NM_004796(17Exons):exon15:c.G2551C:p.D851H&missense | 0.0002575 | Y                 | B;C;D;F:0.0435:0.843:0.771     |
| 14  | 80164153 | T/G         | ID3051 | NRXN3 | missense | NRXN3:NR_073546(8Exons):ncRNA;NRXN3:NR_073547(21Exons):ncRNA;NRXN3:NM_001105250(7Exons):exon5:c.T872G:p.V291G&missense;NRXN3:NM_138970(6Exons):exon4:c.T782G:p.V261G&missense;NRXN3:NM_001272020(6Exons):exon4:c.T782G:p.V261G&missense;NRXN3:NM_004796(17Exons):exon15:c.T2678G:p.V893G&missense | 0.0002575 | Y                 | G;B;C;D;E;F:0.0447:0.839:0.772 |



**eTable 13 (continued). Information about variants identified in the reduced NMDA-mediated synaptic current in the follow-up study**

| CHR | POS      | REF/ALT | rsID        | Gene  | Variant  | RefGeneFeatures                                                                                                                                                                                                                                                                                   | MAF_dis   | Causal_KGGSeq | Prediction_other                |
|-----|----------|---------|-------------|-------|----------|---------------------------------------------------------------------------------------------------------------------------------------------------------------------------------------------------------------------------------------------------------------------------------------------------|-----------|---------------|---------------------------------|
| 14  | 80164252 | G/A     | rs144373051 | NRXN3 | missense | NRXN3:NR_073546(8Exons):ncRNA;NRXN3:NR_073547(21Exons):ncRNA;NRXN3:NM_001105250(7Exons):exon5:c.G971A:p.R324H&missense;NRXN3:NM_138970(6Exons):exon4:c.G881A:p.R294H&missense;NRXN3:NM_001272020(6Exons):exon4:c.G881A:p.R294H&missense;NRXN3:NM_004796(17Exons):exon15:c.G2777A:p.R926H&missense | 0.0002575 | Y             | G;C;J;D;E;H;F:0.026:0.945:0.881 |
| 14  | 80327436 | T/C     | ID3061      | NRXN3 | missense | NRXN3:NR_073546(8Exons):ncRNA;NRXN3:NR_073547(21Exons):ncRNA;NRXN3:NM_001105250(7Exons):intronic6;NRXN3:NM_138970(6Exons):intronic5;NRXN3:NM_004796(17Exons):intronic16;NRXN3:NM_001272020(6Exons):exon6:c.T1043C:p.I348T&missense                                                                | 0.0002667 | Y             | B;D;H;F:0.0414:0.84:0.742       |
| 14  | 80327477 | C/T     | ID3064      | NRXN3 | missense | NRXN3:NR_073546(8Exons):ncRNA;NRXN3:NR_073547(21Exons):ncRNA;NRXN3:NM_001105250(7Exons):intronic6;NRXN3:NM_138970(6Exons):intronic5;NRXN3:NM_004796(17Exons):intronic16;NRXN3:NM_001272020(6Exons):exon6:c.C1084T:p.R362C&missense                                                                | 0.0002814 | Y             | B;D;H;F:0.0414:0.84:0.742       |

**eTable 13 (continued). Information about variants identified in the reduced NMDA-mediated synaptic current in the follow-up study**

| CHR | POS      | REF/ALT | rsID   | Gene  | Variant  | RefGeneFeatures                                                                                                                                                                                                                                                                                      | MAF_dis   | Causal_KGGSeq | Prediction_other                |
|-----|----------|---------|--------|-------|----------|------------------------------------------------------------------------------------------------------------------------------------------------------------------------------------------------------------------------------------------------------------------------------------------------------|-----------|---------------|---------------------------------|
| 14  | 80327547 | G/A     | ID3067 | NRXN3 | missense | NRXN3:NR_073546(8Exons):ncRNA;NRXN3:NR_073547(21Exons):ncRNA;NRXN3:NM_001105250(7Exons):intronic6;NRXN3:NM_138970(6Exons):intronic5;NRXN3:NM_004796(17Exons):intronic16;NRXN3:NM_001272020(6Exons):exon6:c.G1154A:p.C385Y&missense                                                                   | 0.000258  | Y             | G;B;J;D;E;H;F:0.0311:0.938:0.89 |
| 14  | 80327583 | A/T     | ID3068 | NRXN3 | missense | NRXN3:NR_073546(8Exons):ncRNA;NRXN3:NR_073547(21Exons):ncRNA;NRXN3:NM_001105250(7Exons):intronic6;NRXN3:NM_138970(6Exons):intronic5;NRXN3:NM_004796(17Exons):intronic16;NRXN3:NM_001272020(6Exons):exon6:c.A1190T:p.D397V&missense                                                                   | 0.0002576 | Y             | G;B;J;D;E;H;F:0.0311:0.938:0.89 |
| 14  | 80328078 | C/T     | ID3071 | NRXN3 | missense | NRXN3:NR_073546(8Exons):ncRNA;NRXN3:NR_073547(21Exons):ncRNA;NRXN3:NM_001105250(7Exons):exon7:c.C1151T:p.T384I&missense;NRXN3:NM_138970(6Exons):exon6:c.C1070T:p.T357I&missense;NRXN3:NM_001272020(6Exons):exon6:c.C1685T:p.T562I&missense;NRXN3:NM_004796(17Exons):exon17:c.C2957T:p.T986I&missense | 0.0005152 | Y             | G;B;C;J;H;F:0.0261:0.946:0.88   |

**eTable 13 (continued). Information about variants identified in the reduced NMDA-mediated synaptic current in the follow-up study**

| CHR | POS      | REF/<br>ALT | rsID        | Gene   | Variant  | RefGeneFeatures                                                                                                                                                                                                                                                                                       | MAF_dis   | Causal<br>_KGGSeq | Prediction_other                 |
|-----|----------|-------------|-------------|--------|----------|-------------------------------------------------------------------------------------------------------------------------------------------------------------------------------------------------------------------------------------------------------------------------------------------------------|-----------|-------------------|----------------------------------|
| 14  | 80328207 | A/C         | ID3073      | NRXN3  | missense | NRXN3:NR_073546(8Exons):ncRNA;NRXN3:NR_073547(21Exons):ncRNA;NRXN3:NM_001105250(7Exons):exon7:c.A1280C:p.N427T&missense;NRXN3:NM_138970(6Exons):exon6:c.A1199C:p.N400T&missense;NRXN3:NM_001272020(6Exons):exon6:c.A1814C:p.N605T&missense;NRXN3:NM_004796(17Exons):exon17:c.A3086C:p.N1029T&missense | 0.0002576 | Y                 | G;B;C;J;E;H;F:0.0331:0.934:0.901 |
| 16  | 10031817 | G/T         | rs148511104 | GRIN2A | missense | GRIN2A:NM_001134408(14Exons):exon3:c.C1006A:p.P336T&missense;GRIN2A:NM_000833(14Exons):exon4:c.C1006A:p.P336T&missense;GRIN2A:NM_001134407(13Exons):exon3:c.C1006A:p.P336T&missense                                                                                                                   | 0.0002576 | Y                 | B;D;H;F:0.0414:0.84:0.742        |
| 16  | 10031829 | G/C         | ID3206      | GRIN2A | missense | GRIN2A:NM_001134408(14Exons):exon3:c.C994G:p.H332D&missense;GRIN2A:NM_000833(14Exons):exon4:c.C994G:p.H332D&missense;GRIN2A:NM_001134407(13Exons):exon3:c.C994G:p.H332D&missense                                                                                                                      | 0.0002575 | Y                 | B;D;E;F:0.0342:0.872:0.702       |

**eTable 13 (continued). Information about variants identified in the reduced NMDA-mediated synaptic current in the follow-up study**

| CHR | POS      | REF/<br>ALT | rsID   | Gene   | Variant  | RefGeneFeatures                                                                                                                                                                  | MAF_dis   | Causal<br>_KGGSeq | Prediction_other             |
|-----|----------|-------------|--------|--------|----------|----------------------------------------------------------------------------------------------------------------------------------------------------------------------------------|-----------|-------------------|------------------------------|
| 16  | 10031919 | C/T         | ID3207 | GRIN2A | missense | GRIN2A:NM_001134408(14Exons):exon3:c.G904A:p.A302T&missense;GRIN2A:NM_000833(14Exons):exon4:c.G904A:p.A302T&missense;GRIN2A:NM_001134407(13Exons):exon3:c.G904A:p.A302T&missense | 0.0002575 | Y                 | B;C;D;F:0.0435:0.843:0.771   |
| 16  | 10032221 | T/C         | ID3211 | GRIN2A | missense | GRIN2A:NM_001134408(14Exons):exon3:c.A602G:p.Q201R&missense;GRIN2A:NM_000833(14Exons):exon4:c.A602G:p.Q201R&missense;GRIN2A:NM_001134407(13Exons):exon3:c.A602G:p.Q201R&missense | 0.0002575 | Y                 | B;C;D;F:0.0435:0.843:0.771   |
| 16  | 10274027 | C/T         | ID3238 | GRIN2A | missense | GRIN2A:NM_001134408(14Exons):exon2:c.G242A:p.S81N&missense;GRIN2A:NM_000833(14Exons):exon3:c.G242A:p.S81N&missense;GRIN2A:NM_001134407(13Exons):exon2:c.G242A:p.S81N&missense    | 0.0002575 | Y                 | B;C;D;F:0.0435:0.843:0.771   |
| 16  | 10274090 | G/A         | ID3240 | GRIN2A | missense | GRIN2A:NM_001134408(14Exons):exon2:c.C179T:p.A60V&missense;GRIN2A:NM_000833(14Exons):exon3:c.C179T:p.A60V&missense;GRIN2A:NM_001134407(13Exons):exon2:c.C179T:p.A60V&missense    | 0.0002575 | Y                 | B;D;E;F;I:0.0296:0.882:0.686 |

**Table 13 (continued). Information about variants identified in the reduced NMDA-mediated synaptic current in the follow-up study**

| CHR | POS      | REF/ALT | rsID        | Gene   | Variant  | RefGeneFeatures                                                                                                                                                            | MAF_dis   | Causal_KGGSeq | Prediction_other                     |
|-----|----------|---------|-------------|--------|----------|----------------------------------------------------------------------------------------------------------------------------------------------------------------------------|-----------|---------------|--------------------------------------|
| 16  | 10274189 | G/A     | rs367543129 | GRIN2A | missense | GRIN2A:NM_001134408(14Exons):exon2:c.C80T:p.A27V&missense;GRIN2A:NM_000833(14Exons):exon3:c.C80T:p.A27V&missense;GRIN2A:NM_001134407(13Exons):exon2:c.C80T:p.A27V&missense | 0.0007724 | Y             | B;C;D;F:0.0435:0.843:0.771           |
| 16  | 46694511 | G/A     | ID3243      | VPS35  | missense | VPS35:NM_018206(17Exons):exon17:c.C2264T:p.P755L&missense                                                                                                                  | 0.0002575 | Y             | A;G;B;C;J;D;E;H;F:0.0283:0.944:0.891 |
| 16  | 46696993 | C/A     | ID3252      | VPS35  | missense | VPS35:NM_018206(17Exons):exon14:c.G1729T:p.A577S&missense                                                                                                                  | 0.0002575 | Y             | A;D;E;F:0.0413:0.843:0.755           |
| 16  | 46705646 | G/A     | ID3255      | VPS35  | missense | VPS35:NM_018206(17Exons):exon12:c.C1495T:p.R499C&missense                                                                                                                  | 0.0002575 | Y             | A;G;B;C;J;D;E;H;F:0.0283:0.944:0.891 |
| 16  | 46706251 | A/G     | ID3257      | VPS35  | missense | VPS35:NM_018206(17Exons):exon11:c.T1294C:p.S432P&missense                                                                                                                  | 0.0002575 | Y             | A;G;B;C;J;D;E;H;F:0.0283:0.944:0.891 |
| 16  | 46710558 | C/T     | ID3272      | VPS35  | missense | VPS35:NM_018206(17Exons):exon8:c.G851A:p.R284Q&missense                                                                                                                    | 0.0005149 | Y             | B;J;F;I:0.0287:0.937:0.881           |
| 16  | 46716039 | C/T     | rs193077277 | VPS35  | missense | VPS35:NM_018206(17Exons):exon3:c.G151A:p.G51S&missense                                                                                                                     | 0.0007728 | Y             | B;D;H;F:0.0414:0.84:0.742            |
| 16  | 46717518 | G/C     | ID3287      | VPS35  | missense | VPS35:NM_018206(17Exons):exon2:c.C4G:p.P2A&missense                                                                                                                        | 0.0002575 | Y             | A;D;E;F:0.0413:0.843:0.755           |

**eTable 13 (continued). Information about variants identified in the reduced NMDA-mediated synaptic current in the follow-up study**

| CHR | POS     | REF/<br>ALT | rsID   | Gene   | Variant  | RefGeneFeatures                                                                                                                                                    | MAF_dis   | Causal<br>_KGGSeq | Prediction_other                         |
|-----|---------|-------------|--------|--------|----------|--------------------------------------------------------------------------------------------------------------------------------------------------------------------|-----------|-------------------|------------------------------------------|
| 16  | 9857034 | T/C         | ID3119 | GRIN2A | missense | GRIN2A:NM_001134408(14Exons):3UTR+177;GRIN2A:NM_000833(14Exons):exon14:c.A4367G;p.K1456R&missense;GRIN2A:NM_001134407(13Exons):exon13:c.A4367G;p.K1456R&missense   | 0.0002575 | Y                 | B;C;D;F:0.0435:0.843:0.771               |
| 16  | 9857071 | C/A         | ID3121 | GRIN2A | missense | GRIN2A:NM_001134408(14Exons):3UTR+140;GRIN2A:NM_000833(14Exons):exon14:c.G4330T;p.V1444F&missense;GRIN2A:NM_001134407(13Exons):exon13:c.G4330T;p.V1444F&missense   | 0.0005149 | Y                 | B;C;D;F:0.0435:0.843:0.771               |
| 16  | 9857391 | G/C         | ID3124 | GRIN2A | missense | GRIN2A:NM_001134408(14Exons):intronic13;GRIN2A:NM_000833(14Exons):exon14:c.C4010G;p.S1337W&missense;GRIN2A:NM_001134407(13Exons):exon13:c.C4010G;p.S1337W&missense | 0.0002575 | Y                 | G;LRT_score;B;D;E;H;F:0.0311:0.883:0.683 |
| 16  | 9857416 | A/T         | ID3125 | GRIN2A | missense | GRIN2A:NM_001134408(14Exons):intronic13;GRIN2A:NM_000833(14Exons):exon14:c.T3985A;p.F1329I&missense;GRIN2A:NM_001134407(13Exons):exon13:c.T3985A;p.F1329I&missense | 0.000258  | Y                 | B;C;D;F:0.0435:0.843:0.771               |

**eTable 13 (continued). Information about variants identified in the reduced NMDA-mediated synaptic current in the follow-up study**

| CHR | POS     | REF/<br>ALT | rsID   | Gene   | Variant  | RefGeneFeatures                                                                                                                                                                           | MAF_dis   | Causal<br>_KGGSeq | Prediction_other                 |
|-----|---------|-------------|--------|--------|----------|-------------------------------------------------------------------------------------------------------------------------------------------------------------------------------------------|-----------|-------------------|----------------------------------|
| 16  | 9857830 | A/C         | ID3133 | GRIN2A | missense | GRIN2A:NM_001134408(14Exons):exon13:c.T3571G:p.F1191V&missense;GRIN2A:NM_000833(14Exons):exon14:c.T3571G:p.F1191V&missense;GRIN2A:NM_001134407(13Exons):exon13:c.T3571G:p.F1191V&missense | 0.0002575 | Y                 | B;D;E;H;F:0.0336:0.865:0.712     |
| 16  | 9857976 | G/C         | ID3135 | GRIN2A | missense | GRIN2A:NM_001134408(14Exons):exon13:c.C3425G:p.P1142R&missense;GRIN2A:NM_000833(14Exons):exon14:c.C3425G:p.P1142R&missense;GRIN2A:NM_001134407(13Exons):exon13:c.C3425G:p.P1142R&missense | 0.0002577 | Y                 | G;B;C;E;H;F;I:0.0411:0.848:0.763 |
| 16  | 9858103 | C/T         | ID3136 | GRIN2A | missense | GRIN2A:NM_001134408(14Exons):exon13:c.G3298A:p.E1100K&missense;GRIN2A:NM_000833(14Exons):exon14:c.G3298A:p.E1100K&missense;GRIN2A:NM_001134407(13Exons):exon13:c.G3298A:p.E1100K&missense | 0.0002575 | Y                 | B;C;D;F:0.0435:0.843:0.771       |
| 16  | 9858162 | T/A         | ID3137 | GRIN2A | missense | GRIN2A:NM_001134408(14Exons):exon13:c.A3239T:p.H1080L&missense;GRIN2A:NM_000833(14Exons):exon14:c.A3239T:p.H1080L&missense;GRIN2A:NM_001134407(13Exons):exon13:c.A3239T:p.H1080L&missense | 0.0002575 | Y                 | B;D;E;F:0.0342:0.872:0.702       |

**eTable 13 (continued). Information about variants identified in the reduced NMDA-mediated synaptic current in the follow-up study**

| CHR | POS     | REF/ALT | rsID   | Gene   | Variant  | RefGeneFeatures                                                                                                                                                                           | MAF_dis   | Causal_KGGSeq | Prediction_other             |
|-----|---------|---------|--------|--------|----------|-------------------------------------------------------------------------------------------------------------------------------------------------------------------------------------------|-----------|---------------|------------------------------|
| 16  | 9858195 | G/A     | ID3138 | GRIN2A | missense | GRIN2A:NM_001134408(14Exons):exon13:c.C3206T:p.T1069M&missense;GRIN2A:NM_000833(14Exons):exon14:c.C3206T:p.T1069M&missense;GRIN2A:NM_001134407(13Exons):exon13:c.C3206T:p.T1069M&missense | 0.0002575 | Y             | B;C;D;F:0.0435:0.843:0.771   |
| 16  | 9858202 | G/A     | ID3139 | GRIN2A | missense | GRIN2A:NM_001134408(14Exons):exon13:c.C3199T:p.R1067W&missense;GRIN2A:NM_000833(14Exons):exon14:c.C3199T:p.R1067W&missense;GRIN2A:NM_001134407(13Exons):exon13:c.C3199T:p.R1067W&missense | 0.0002575 | Y             | G;B;C;E;F:0.0455:0.829:0.783 |
| 16  | 9858403 | C/T     | ID3142 | GRIN2A | missense | GRIN2A:NM_001134408(14Exons):exon13:c.G2998A:p.V1000M&missense;GRIN2A:NM_000833(14Exons):exon14:c.G2998A:p.V1000M&missense;GRIN2A:NM_001134407(13Exons):exon13:c.G2998A:p.V1000M&missense | 0.0002575 | Y             | B;C;D;F:0.0435:0.843:0.771   |
| 16  | 9858642 | C/G     | ID3143 | GRIN2A | missense | GRIN2A:NM_001134408(14Exons):exon13:c.G2759C:p.R920T&missense;GRIN2A:NM_000833(14Exons):exon14:c.G2759C:p.R920T&missense;GRIN2A:NM_001134407(13Exons):exon13:c.G2759C:p.R920T&missense    | 0.0002575 | Y             | B;C;D;F:0.0435:0.843:0.771   |



**eTable 13 (continued). Information about variants identified in the reduced NMDA-mediated synaptic current in the follow-up study**

| CHR | POS     | REF/<br>ALT | rsID        | Gene   | Variant  | RefGeneFeatures                                                                                                                                                                        | MAF_dis   | Causal<br>_KGGSeq | Prediction_other               |
|-----|---------|-------------|-------------|--------|----------|----------------------------------------------------------------------------------------------------------------------------------------------------------------------------------------|-----------|-------------------|--------------------------------|
| 16  | 9858751 | C/T         | ID3144      | GRIN2A | missense | GRIN2A:NM_001134408(14Exons):exon13:c.G2650A:p.D884N&missense;GRIN2A:NM_000833(14Exons):exon14:c.G2650A:p.D884N&missense;GRIN2A:NM_001134407(13Exons):exon13:c.G2650A:p.D884N&missense | 0.0005149 | Y                 | B;C;D;F:0.0435:0.843:0.771     |
| 16  | 9858765 | T/C         | rs183029507 | GRIN2A | missense | GRIN2A:NM_001134408(14Exons):exon13:c.A2636G:p.K879R&missense;GRIN2A:NM_000833(14Exons):exon14:c.A2636G:p.K879R&missense;GRIN2A:NM_001134407(13Exons):exon13:c.A2636G:p.K879R&missense | 0.002317  | Y                 | G;B;C;D;E;F:0.0447:0.839:0.772 |
| 16  | 9858774 | A/G         | rs199784503 | GRIN2A | missense | GRIN2A:NM_001134408(14Exons):exon13:c.T2627C:p.I876T&missense;GRIN2A:NM_000833(14Exons):exon14:c.T2627C:p.I876T&missense;GRIN2A:NM_001134407(13Exons):exon13:c.T2627C:p.I876T&missense | 0.005664  | Y                 | B;C;D;F:0.0435:0.843:0.771     |
| 16  | 9862737 | G/C         | rs201072838 | GRIN2A | missense | GRIN2A:NM_001134408(14Exons):exon12:c.C2566G:p.R856G&missense;GRIN2A:NM_000833(14Exons):exon13:c.C2566G:p.R856G&missense;GRIN2A:NM_001134407(13Exons):exon12:c.C2566G:p.R856G&missense | 0.0007724 | Y                 | B;C;D;F:0.0435:0.843:0.771     |

**eTable 13 (continued). Information about variants identified in the reduced NMDA-mediated synaptic current in the follow-up study**

| CHR | POS     | REF/<br>ALT | rsID        | Gene   | Variant  | RefGeneFeatures                                                                                                                                                                        | MAF_dis   | Causal<br>_KGGSeq | Prediction_other                   |
|-----|---------|-------------|-------------|--------|----------|----------------------------------------------------------------------------------------------------------------------------------------------------------------------------------------|-----------|-------------------|------------------------------------|
| 16  | 9862818 | C/A         | ID3150      | GRIN2A | missense | GRIN2A:NM_001134408(14Exons):exon12:c.G2485T:p.A829S&missense;GRIN2A:NM_000833(14Exons):exon13:c.G2485T:p.A829S&missense;GRIN2A:NM_001134407(13Exons):exon12:c.G2485T:p.A829S&missense | 0.0002575 | Y                 | B;C;D;F:0.0435:0.843:0.771         |
| 16  | 9892139 | C/G         | rs76392464  | GRIN2A | missense | GRIN2A:NM_001134408(14Exons):exon11:c.G2351C:p.G784A&missense;GRIN2A:NM_000833(14Exons):exon12:c.G2351C:p.G784A&missense;GRIN2A:NM_001134407(13Exons):exon11:c.G2351C:p.G784A&missense | 0.0002575 | Y                 | G;B;J;E;F:0.0313:0.934:0.89        |
| 16  | 9923450 | A/G         | ID3167      | GRIN2A | missense | GRIN2A:NM_001134408(14Exons):exon9:c.T1837C:p.F613L&missense;GRIN2A:NM_000833(14Exons):exon10:c.T1837C:p.F613L&missense;GRIN2A:NM_001134407(13Exons):exon9:c.T1837C:p.F613L&missense   | 0.0002575 | Y                 | G;B;C;J;D;E;H;F:0.0288:0.942:0.888 |
| 16  | 9923507 | G/A         | rs367543140 | GRIN2A | missense | GRIN2A:NM_001134408(14Exons):exon9:c.C1780T:p.P594S&missense;GRIN2A:NM_000833(14Exons):exon10:c.C1780T:p.P594S&missense;GRIN2A:NM_001134407(13Exons):exon9:c.C1780T:p.P594S&missense   | 0.0005149 | Y                 | G;B;J;D;E;H;F:0.0311:0.938:0.89    |

**eTable 13 (continued). Information about variants identified in the reduced NMDA-mediated synaptic current in the follow-up study**

| CHR | POS      | REF/<br>ALT | rsID   | Gene   | Variant  | RefGeneFeatures                                                                                                                                                                     | MAF_dis   | Causal<br>_KGGSeq | Prediction_other               |
|-----|----------|-------------|--------|--------|----------|-------------------------------------------------------------------------------------------------------------------------------------------------------------------------------------|-----------|-------------------|--------------------------------|
| 16  | 9928058  | T/A         | ID3172 | GRIN2A | missense | GRIN2A:NM_001134408(14Exons):exon8:c.A1681T;p.M561L&missense;GRIN2A:NM_000833(14Exons):exon9:c.A1681T;p.M561L&missense;GRIN2A:NM_001134407(13Exons):exon8:c.A1681T;p.M561L&missense | 0.0002575 | Y                 | B;J;F:0.0352:0.926:0.895       |
| 16  | 9934949  | A/T         | ID3196 | GRIN2A | missense | GRIN2A:NM_001134408(14Exons):exon6:c.T1341A;p.N447K&missense;GRIN2A:NM_000833(14Exons):exon7:c.T1341A;p.N447K&missense;GRIN2A:NM_001134407(13Exons):exon6:c.T1341A;p.N447K&missense | 0.0005149 | Y                 | B;C;E;I:0.0411:0.84:0.733      |
| 16  | 9943670  | G/A         | ID3198 | GRIN2A | missense | GRIN2A:NM_001134408(14Exons):exon5:c.C1271T;p.P424L&missense;GRIN2A:NM_000833(14Exons):exon6:c.C1271T;p.P424L&missense;GRIN2A:NM_001134407(13Exons):exon5:c.C1271T;p.P424L&missense | 0.0002575 | Y                 | B;C;D;F:0.0435:0.843:0.771     |
| 16  | 9984907  | T/G         | ID3200 | GRIN2A | missense | GRIN2A:NM_001134408(14Exons):exon4:c.A1058C;p.E353A&missense;GRIN2A:NM_000833(14Exons):exon5:c.A1058C;p.E353A&missense;GRIN2A:NM_001134407(13Exons):exon4:c.A1058C;p.E353A&missense | 0.0002575 | Y                 | B;D;H;F:0.0414:0.84:0.742      |
| 19  | 30303652 | G/A         | ID3498 | CCNE1  | missense | CCNE1:NM_001238(12Exons):exon3:c.G80A;p.R27H&missense                                                                                                                               | 0.0002575 | Y                 | A;B;C;D;E;F:0.0484:0.828:0.792 |

**eTable 13 (continued). Information about variants identified in the reduced NMDA-mediated synaptic current in the follow-up study**

| CHR | POS      | REF/<br>ALT | rsID        | Gene  | Variant  | RefGeneFeatures                                                                                                | MAF_dis   | Causal<br>_KGGSeq | Prediction_other               |
|-----|----------|-------------|-------------|-------|----------|----------------------------------------------------------------------------------------------------------------|-----------|-------------------|--------------------------------|
| 19  | 30303901 | T/C         | ID3501      | CCNE1 | missense | CCNE1:NM_001238(12Exons):exon4:c.T137C:p.M46T&missense                                                         | 0.0002575 | Y                 | B;D;H;F:0.0414:0.84:0.742      |
| 19  | 30312636 | A/G         | rs149261350 | CCNE1 | missense | CCNE1:NM_001238(12Exons):exon8:c.A617G:p.Y206C&missense                                                        | 0.0002575 | Y                 | A;B;C;D;E;F:0.0484:0.828:0.792 |
| 19  | 30314658 | C/T         | ID3520      | CCNE1 | stopgain | CCNE1:NM_001238(12Exons):exon12:c.C1207T:p.Q403*&stopgain                                                      | 0.0002575 | Y                 | B;D;H;F:0.0414:0.84:0.742      |
| 19  | 45971874 | C/A         | ID3526      | FOSB  | missense | FOSB:NM_006732(4Exons):exon1:c.C30A:p.D10E&missense;FOSB:NM_001114171(3Exons):exon1:c.C30A:p.D10E&missense     | 0.0002575 | Y                 | C;D;E;F:0.042:0.839:0.776      |
| 19  | 45971902 | T/A         | ID3527      | FOSB  | missense | FOSB:NM_006732(4Exons):exon1:c.T58A:p.S20T&missense;FOSB:NM_001114171(3Exons):exon1:c.T58A:p.S20T&missense     | 0.0002575 | Y                 | A;B;C;D;E;F:0.0484:0.828:0.792 |
| 19  | 45974059 | C/T         | rs199733739 | FOSB  | missense | FOSB:NM_006732(4Exons):exon2:c.C299T:p.P100L&missense;FOSB:NM_001114171(3Exons):exon2:c.C299T:p.P100L&missense | 0.0002575 | Y                 | A;B;C;D;E;H:0.056:0.812:0.793  |
| 19  | 45974106 | G/A         | rs143780767 | FOSB  | missense | FOSB:NM_006732(4Exons):exon2:c.G346A:p.G116R&missense;FOSB:NM_001114171(3Exons):exon2:c.G346A:p.G116R&missense | 0.0002575 | Y                 | B;D;E;F;I:0.0296:0.882:0.686   |
| 19  | 45974182 | G/A         | ID3535      | FOSB  | missense | FOSB:NM_006732(4Exons):exon2:c.G422A:p.R141Q&missense;FOSB:NM_001114171(3Exons):exon2:c.G422A:p.R141Q&missense | 0.0002575 | Y                 | A;B;C;D;E;F:0.0484:0.828:0.792 |

**eTable 13 (continued). Information about variants identified in the reduced NMDA-mediated synaptic current in the follow-up study**

| CHR | POS      | REF/<br>ALT | rsID        | Gene  | Variant  | RefGeneFeatures                                                                                                                                                                 | MAF_dis   | Causal<br>_KGGSeq | Prediction_other               |
|-----|----------|-------------|-------------|-------|----------|---------------------------------------------------------------------------------------------------------------------------------------------------------------------------------|-----------|-------------------|--------------------------------|
| 19  | 45974196 | C/G         | ID3536      | FOSB  | missense | FOSB:NM_006732(4Exons):exon2:c.C436G:p.R146G&missense;FOSB:NM_001114171(3Exons):exon2:c.C436G:p.R146G&missense                                                                  | 0.0002575 | Y                 | A;B;C;D;H;F:0.0455:0.832:0.786 |
| 19  | 45975932 | G/A         | ID3549      | FOSB  | missense | FOSB:NM_006732(4Exons):exon4:c.G679A:p.E227K&missense;FOSB:NM_001114171(3Exons):exon3:c.G571A:p.E191K&missense                                                                  | 0.0002575 | Y                 | A;D;E;F:0.0413:0.843:0.755     |
| 19  | 45976191 | C/T         | ID3555      | FOSB  | missense | FOSB:NM_006732(4Exons):exon4:c.C938T:p.A313V&missense;FOSB:NM_001114171(3Exons):exon3:c.C830T:p.A277V&missense                                                                  | 0.0002575 | Y                 | A;B;J;D;E;H:0.0322:0.938:0.895 |
| 19  | 45976196 | G/T         | ID3556      | FOSB  | missense | FOSB:NM_006732(4Exons):exon4:c.G943T:p.A315S&missense;FOSB:NM_001114171(3Exons):exon3:c.G835T:p.A279S&missense                                                                  | 0.0002575 | Y                 | A;B;D;E;F:0.0385:0.859:0.732   |
| 2   | 50280445 | T/G         | ID270       | NRXN1 | missense | NRXN1:NM_001135659(24Exons):exon22:c.A4212C:p.R1404S&missense;NRXN1:NM_004801(22Exons):exon20:c.A4002C:p.R1334S&missense;NRXN1:NM_138735(6Exons):exon4:c.A897C:p.R299S&missense | 0.0002576 | Y                 | A;B;C;D;E;F:0.0484:0.828:0.792 |
| 2   | 50280470 | G/A         | rs199701703 | NRXN1 | missense | NRXN1:NM_001135659(24Exons):exon22:c.C4187T:p.T1396M&missense;NRXN1:NM_004801(22Exons):exon20:c.C3977T:p.T1326M&missense;NRXN1:NM_138735(6Exons):exon4:c.C872T:p.T291M&missense | 0.0005149 | Y                 | A;B;C;D;E;F:0.0484:0.828:0.792 |

**eTable 13 (continued). Information about variants identified in the reduced NMDA-mediated synaptic current in the follow-up study**

| CHR | POS      | REF/ALT | rsID        | Gene  | Variant  | RefGeneFeatures                                                                                                                                                                 | MAF_dis   | Causal_KGGSeq | Prediction_other               |
|-----|----------|---------|-------------|-------|----------|---------------------------------------------------------------------------------------------------------------------------------------------------------------------------------|-----------|---------------|--------------------------------|
| 2   | 50280477 | T/A     | rs202006815 | NRXN1 | missense | NRXN1:NM_001135659(24Exons):exon22:c.A4180T;p.T1394S&missense;NRXN1:NM_004801(22Exons):exon20:c.A3970T;p.T1324S&missense;NRXN1:NM_138735(6Exons):exon4:c.A865T;p.T289S&missense | 0.005664  | Y             | A;B;C;D;E;F:0.0484:0.828:0.792 |
| 2   | 50280526 | C/G     | rs200935246 | NRXN1 | missense | NRXN1:NM_001135659(24Exons):exon22:c.G4131C;p.E1377D&missense;NRXN1:NM_004801(22Exons):exon20:c.G3921C;p.E1307D&missense;NRXN1:NM_138735(6Exons):exon4:c.G816C;p.E272D&missense | 0.001287  | Y             | A;B;D;E;F:0.0385:0.859:0.732   |
| 2   | 50280545 | G/A     | ID272       | NRXN1 | missense | NRXN1:NM_001135659(24Exons):exon22:c.C4112T;p.P1371L&missense;NRXN1:NM_004801(22Exons):exon20:c.C3902T;p.P1301L&missense;NRXN1:NM_138735(6Exons):exon4:c.C797T;p.P266L&missense | 0.0002576 | Y             | A;B;C;D;E;F:0.0484:0.828:0.792 |
| 2   | 50280555 | C/T     | ID273       | NRXN1 | missense | NRXN1:NM_001135659(24Exons):exon22:c.G4102A;p.G1368S&missense;NRXN1:NM_004801(22Exons):exon20:c.G3892A;p.G1298S&missense;NRXN1:NM_138735(6Exons):exon4:c.G787A;p.G263S&missense | 0.0002576 | Y             | A;B;C;D;E;F:0.0484:0.828:0.792 |

**eTable 13 (continued). Information about variants identified in the reduced NMDA-mediated synaptic current in the follow-up study**

| CHR | POS      | REF/ALT | rsID  | Gene  | Variant  | RefGeneFeatures                                                                                                                                                                 | MAF_dis   | Causal_KGGSeq | Prediction_other                     |
|-----|----------|---------|-------|-------|----------|---------------------------------------------------------------------------------------------------------------------------------------------------------------------------------|-----------|---------------|--------------------------------------|
| 2   | 50280645 | A/G     | ID274 | NRXN1 | missense | NRXN1:NM_001135659(24Exons):exon22:c.T4012C:p.S1338P&missense;NRXN1:NM_004801(22Exons):exon20:c.T3802C:p.S1268P&missense;NRXN1:NM_138735(6Exons):exon4:c.T697C:p.S233P&missense | 0.0002587 | Y             | A;B;C;D;E;F:0.0484:0.828:0.792       |
| 2   | 50282126 | C/G     | ID278 | NRXN1 | missense | NRXN1:NM_004801(22Exons):intronic19;NRXN1:NM_138735(6Exons):intronic3;NRXN1:NM_001135659(24Exons):exon21:c.G3895C:p.G1299R&missense                                             | 0.0002575 | Y             | A;G;B;C;J;D;E;H;F:0.0283:0.944:0.891 |
| 2   | 50318539 | C/T     | ID282 | NRXN1 | missense | NRXN1:NM_001135659(24Exons):exon20:c.G3760A:p.V1254I&missense;NRXN1:NM_004801(22Exons):exon19:c.G3640A:p.V1214I&missense;NRXN1:NM_138735(6Exons):exon3:c.G535A:p.V179I&missense | 0.0002575 | Y             | A;D;E;H;I:0.0436:0.86:0.724          |
| 2   | 50464070 | T/C     | ID285 | NRXN1 | missense | NRXN1:NM_001135659(24Exons):exon19:c.A3523G:p.I1175V&missense;NRXN1:NM_004801(22Exons):exon18:c.A3403G:p.I1135V&missense;NRXN1:NM_138735(6Exons):exon2:c.A298G:p.I100V&missense | 0.00103   | Y             | A;B;C;D;E;F:0.0484:0.828:0.792       |

**eTable 13 (continued). Information about variants identified in the reduced NMDA-mediated synaptic current in the follow-up study**

| CHR | POS      | REF/<br>ALT | rsID        | Gene  | Variant  | RefGeneFeatures                                                                                                                      | MAF_dis   | Causal<br>_KGGSeq | Prediction_other                 |
|-----|----------|-------------|-------------|-------|----------|--------------------------------------------------------------------------------------------------------------------------------------|-----------|-------------------|----------------------------------|
| 2   | 50573850 | C/G         | ID287       | NRXN1 | missense | NRXN1:NM_001135659(24Exons):intronic18<br>;NRXN1:NM_004801(22Exons):intronic17;NRXN1:NM_138735(6Exons):exon1:c.G238C:p.A80P&missense | 0.0002583 | Y                 | A;B;C;D;E;H;F:0.0432:0.844:0.773 |
| 2   | 50573937 | C/T         | rs201698370 | NRXN1 | missense | NRXN1:NM_001135659(24Exons):intronic18<br>;NRXN1:NM_004801(22Exons):intronic17;NRXN1:NM_138735(6Exons):exon1:c.G151A:p.A51T&missense | 0.0002612 | Y                 | A;B;C;D;E;H;F:0.0432:0.844:0.773 |
| 2   | 50692685 | A/G         | ID297       | NRXN1 | missense | NRXN1:NM_001135659(24Exons):exon18:c.T3379C:p.C1127R&missense;NRXN1:NM_004801(22Exons):exon17:c.T3259C:p.C1087R&missense             | 0.0002575 | Y                 | A;B;C;D;E;F:0.0484:0.828:0.792   |
| 2   | 50699586 | C/G         | ID304       | NRXN1 | missense | NRXN1:NM_001135659(24Exons):exon17:c.G3214C:p.A1072P&missense;NRXN1:NM_004801(22Exons):exon16:c.G3094C:p.A1032P&missense             | 0.0002595 | Y                 | B;D;H;F:0.0414:0.84:0.742        |
| 2   | 50723070 | C/A         | ID308       | NRXN1 | missense | NRXN1:NM_001135659(24Exons):exon16:c.G3163T;p.A1055S&missense;NRXN1:NM_004801(22Exons):exon15:c.G3043T;p.A1015S&missense             | 0.0005149 | Y                 | B;D;F:0.0397:0.842:0.734         |



**eTable 13 (continued). Information about variants identified in the reduced NMDA-mediated synaptic current in the follow-up study**

| CHR | POS      | REF/<br>ALT | rsID            | Gene  | Variant  | RefGeneFeatures                                                                                                        | MAF_dis   | Causal<br>_KGGSeq | Prediction_other               |
|-----|----------|-------------|-----------------|-------|----------|------------------------------------------------------------------------------------------------------------------------|-----------|-------------------|--------------------------------|
| 2   | 50724568 | G/A         | ID316           | NRXN1 | missense | NRXN1:NM_001135659(24Exons):exon15:c.C2902T:p.H968Y&missense;NRXN1:NM_004801(22Exons):exon14:c.C2782T:p.H928Y&missense | 0.0002575 | Y                 | A;B;C;D;E;F:0.0484:0.828:0.792 |
| 2   | 50733642 | C/T         | ID320           | NRXN1 | missense | NRXN1:NM_001135659(24Exons):exon14:c.G2608A:p.A870T&missense;NRXN1:NM_004801(22Exons):exon13:c.G2488A:p.A830T&missense | 0.0002599 | Y                 | B;D;H;F:0.0414:0.84:0.742      |
| 2   | 50733684 | G/A         | ID321           | NRXN1 | missense | NRXN1:NM_001135659(24Exons):exon14:c.C2566T:p.R856W&missense;NRXN1:NM_004801(22Exons):exon13:c.C2446T:p.R816W&missense | 0.0002599 | Y                 | A;B;C;D;E;F:0.0484:0.828:0.792 |
| 2   | 50733720 | G/T         | ID322           | NRXN1 | missense | NRXN1:NM_001135659(24Exons):exon14:c.C2530A:p.L844I&missense;NRXN1:NM_004801(22Exons):exon13:c.C2410A:p.L804I&missense | 0.001299  | Y                 | A;B;C;D;E;F:0.0484:0.828:0.792 |
| 2   | 50758389 | G/A         | rs2013878<br>57 | NRXN1 | missense | NRXN1:NM_001135659(24Exons):exon12:c.C2443T:p.R815C&missense;NRXN1:NM_004801(22Exons):exon11:c.C2323T:p.R775C&missense | 0.0002575 | Y                 | A;B;C;D;E;F:0.0484:0.828:0.792 |

**eTable 13 (continued). Information about variants identified in the reduced NMDA-mediated synaptic current in the follow-up study**

| CHR | POS      | REF/<br>ALT | rsID            | Gene  | Variant  | RefGeneFeatures                                                                                                        | MAF_dis   | Causal<br>_KGGSeq | Prediction_other                     |
|-----|----------|-------------|-----------------|-------|----------|------------------------------------------------------------------------------------------------------------------------|-----------|-------------------|--------------------------------------|
| 2   | 50758451 | A/G         | ID330           | NRXN1 | missense | NRXN1:NM_001135659(24Exons):exon12:c.T2381C:p.I794T&missense;NRXN1:NM_004801(22Exons):exon11:c.T2261C:p.I754T&missense | 0.0007724 | Y                 | A;B;C;D;E;F:0.0484:0.828:0.792       |
| 2   | 50758482 | A/C         | ID331           | NRXN1 | missense | NRXN1:NM_001135659(24Exons):exon12:c.T2350G:p.L784V&missense;NRXN1:NM_004801(22Exons):exon11:c.T2230G:p.L744V&missense | 0.0002575 | Y                 | A;B;C;D;E;F:0.0484:0.828:0.792       |
| 2   | 50765424 | C/T         | ID333           | NRXN1 | missense | NRXN1:NM_001135659(24Exons):exon11:c.G2230A:p.G744R&missense;NRXN1:NM_004801(22Exons):exon10:c.G2110A:p.G704R&missense | 0.0007724 | Y                 | A;B;C;D;E;F:0.0484:0.828:0.792       |
| 2   | 50765565 | G/A         | rs2008441<br>26 | NRXN1 | missense | NRXN1:NM_001135659(24Exons):exon11:c.C2089T:p.R697W&missense;NRXN1:NM_004801(22Exons):exon10:c.C1969T:p.R657W&missense | 0.0002575 | Y                 | A;G;B;C;J;D;E;H;F:0.0283:0.944:0.891 |
| 2   | 50765756 | G/A         | rs2015301<br>75 | NRXN1 | missense | NRXN1:NM_001135659(24Exons):exon11:c.C1898T:p.T633M&missense;NRXN1:NM_004801(22Exons):exon10:c.C1778T:p.T593M&missense | 0.0005149 | Y                 | A;B;C;D;E;F:0.0484:0.828:0.792       |

**eTable 13 (continued). Information about variants identified in the reduced NMDA-mediated synaptic current in the follow-up study**

| CHR | POS      | REF/<br>ALT | rsID  | Gene  | Variant  | RefGeneFeatures                                                                                                       | MAF_dis   | Causal<br>_KGGSeq | Prediction_other                     |
|-----|----------|-------------|-------|-------|----------|-----------------------------------------------------------------------------------------------------------------------|-----------|-------------------|--------------------------------------|
| 2   | 50779802 | A/G         | ID338 | NRXN1 | missense | NRXN1:NM_001135659(24Exons):exon10:c.T1802C:p.I601T&missense;NRXN1:NM_004801(22Exons):exon9:c.T1682C:p.I561T&missense | 0.0002579 | Y                 | A;B;D;E;F:0.0385:0.859:0.732         |
| 2   | 50779857 | T/C         | ID339 | NRXN1 | missense | NRXN1:NM_001135659(24Exons):exon10:c.A1747G:p.I583V&missense;NRXN1:NM_004801(22Exons):exon9:c.A1627G:p.I543V&missense | 0.0002579 | Y                 | B;D;E;F:0.0342:0.872:0.702           |
| 2   | 50780027 | G/A         | ID341 | NRXN1 | missense | NRXN1:NM_001135659(24Exons):exon10:c.C1577T:p.T526I&missense;NRXN1:NM_004801(22Exons):exon9:c.C1457T:p.T486I&missense | 0.0002579 | Y                 | A;B;C;D;E;F:0.0484:0.828:0.792       |
| 2   | 50780102 | G/A         | ID342 | NRXN1 | missense | NRXN1:NM_001135659(24Exons):exon10:c.C1502T:p.P501L&missense;NRXN1:NM_004801(22Exons):exon9:c.C1382T:p.P461L&missense | 0.0002579 | Y                 | A;G;B;C;J;D;E;H;F:0.0283:0.944:0.891 |
| 2   | 50780163 | C/T         | ID343 | NRXN1 | missense | NRXN1:NM_001135659(24Exons):exon10:c.G1441A:p.V481I&missense;NRXN1:NM_004801(22Exons):exon9:c.G1321A:p.V441I&missense | 0.0002579 | Y                 | A;B;C;D;E;F:0.0484:0.828:0.792       |

**eTable 13 (continued). Information about variants identified in the reduced NMDA-mediated synaptic current in the follow-up study**

| CHR | POS      | REF/<br>ALT | rsID            | Gene  | Variant  | RefGeneFeatures                                                                                                      | MAF_dis   | Causal<br>_KGGSeq | Prediction_other                   |
|-----|----------|-------------|-----------------|-------|----------|----------------------------------------------------------------------------------------------------------------------|-----------|-------------------|------------------------------------|
| 2   | 50847168 | G/C         | rs1920693<br>55 | NRXN1 | missense | NRXN1:NM_001135659(24Exons):exon9:c.C1432G:p.L478V&missense;NRXN1:NM_004801(22Exons):exon8:c.C1312G:p.L438V&missense | 0.0005149 | Y                 | A;B;C;D;E;F:0.0484:0.828:0.792     |
| 2   | 50847192 | C/T         | ID344           | NRXN1 | missense | NRXN1:NM_001135659(24Exons):exon9:c.G1408A:p.V470I&missense;NRXN1:NM_004801(22Exons):exon8:c.G1288A:p.V430I&missense | 0.0002575 | Y                 | A;G;B;C;E;H;F;I:0.0486:0.826:0.795 |
| 2   | 51253559 | T/C         | ID365           | NRXN1 | missense | NRXN1:NM_004801(22Exons):intronic2;NRXN1:NM_001135659(24Exons):exon3:c.A821G:p.N274S&missense                        | 0.00103   | Y                 | B;J;E;I:0.0312:0.928:0.884         |
| 2   | 51254796 | C/G         | ID373           | NRXN1 | missense | NRXN1:NM_001135659(24Exons):exon2:c.G616C:p.D206H&missense;NRXN1:NM_004801(22Exons):exon2:c.G616C:p.D206H&missense   | 0.0002575 | Y                 | G;B;C;D;E;F:0.0447:0.839:0.772     |
| 2   | 51254801 | A/T         | ID375           | NRXN1 | missense | NRXN1:NM_001135659(24Exons):exon2:c.T611A:p.L204Q&missense;NRXN1:NM_004801(22Exons):exon2:c.T611A:p.L204Q&missense   | 0.00103   | Y                 | B;C;E;H;F;I:0.0445:0.826:0.782     |

**eTable 13 (continued). Information about variants identified in the reduced NMDA-mediated synaptic current in the follow-up study**

| CHR | POS      | REF/<br>ALT | rsID            | Gene  | Variant  | RefGeneFeatures                                                                                                    | MAF_dis   | Causal<br>_KGGSeq | Prediction_other               |
|-----|----------|-------------|-----------------|-------|----------|--------------------------------------------------------------------------------------------------------------------|-----------|-------------------|--------------------------------|
| 2   | 51254843 | T/C         | rs2007925<br>04 | NRXN1 | missense | NRXN1:NM_001135659(24Exons):exon2:c.A569G:p.N190S&missense;NRXN1:NM_004801(22Exons):exon2:c.A569G:p.N190S&missense | 0.0002575 | Y                 | A;B;C;D;E;F:0.0484:0.828:0.792 |
| 2   | 51254933 | G/A         | rs3715175<br>84 | NRXN1 | missense | NRXN1:NM_001135659(24Exons):exon2:c.C479T:p.P160L&missense;NRXN1:NM_004801(22Exons):exon2:c.C479T:p.P160L&missense | 0.0002575 | Y                 | A;B;C;D;E;F:0.0484:0.828:0.792 |
| 2   | 51254957 | C/A         | ID377           | NRXN1 | missense | NRXN1:NM_001135659(24Exons):exon2:c.G455T:p.G152V&missense;NRXN1:NM_004801(22Exons):exon2:c.G455T:p.G152V&missense | 0.0002575 | Y                 | C;D;H;I:0.0488:0.826:0.778     |
| 2   | 51254963 | A/T         | ID378           | NRXN1 | missense | NRXN1:NM_001135659(24Exons):exon2:c.T449A:p.F150Y&missense;NRXN1:NM_004801(22Exons):exon2:c.T449A:p.F150Y&missense | 0.0002575 | Y                 | A;B;C;D;E;F:0.0484:0.828:0.792 |
| 2   | 51254966 | A/G         | ID379           | NRXN1 | missense | NRXN1:NM_001135659(24Exons):exon2:c.T446C:p.V149A&missense;NRXN1:NM_004801(22Exons):exon2:c.T446C:p.V149A&missense | 0.0005149 | Y                 | A;B;C;D;E;F:0.0484:0.828:0.792 |

**eTable 13 (continued). Information about variants identified in the reduced NMDA-mediated synaptic current in the follow-up study**

| CHR | POS      | REF/<br>ALT | rsID   | Gene   | Variant  | RefGeneFeatures                                                                                                  | MAF_dis   | Causal<br>_KGGSeq | Prediction_other               |
|-----|----------|-------------|--------|--------|----------|------------------------------------------------------------------------------------------------------------------|-----------|-------------------|--------------------------------|
| 2   | 51255129 | T/C         | ID382  | NRXN1  | missense | NRXN1:NM_001135659(24Exons):exon2:c.A283G:p.I95V&missense;NRXN1:NM_004801(22Exons):exon2:c.A283G:p.I95V&missense | 0.0005149 | Y                 | A;B;C;D;E;F:0.0484:0.828:0.792 |
| 2   | 51255161 | G/T         | ID384  | NRXN1  | missense | NRXN1:NM_001135659(24Exons):exon2:c.C251A:p.T84K&missense;NRXN1:NM_004801(22Exons):exon2:c.C251A:p.T84K&missense | 0.0002575 | Y                 | A;D;E;F:0.0413:0.843:0.755     |
| 2   | 51255311 | G/T         | ID385  | NRXN1  | missense | NRXN1:NM_001135659(24Exons):exon2:c.C101A:p.P34Q&missense;NRXN1:NM_004801(22Exons):exon2:c.C101A:p.P34Q&missense | 0.0002575 | Y                 | G;B;C;E;H;I:0.0496:0.825:0.766 |
| 2   | 51255384 | C/T         | ID386  | NRXN1  | missense | NRXN1:NM_001135659(24Exons):exon2:c.G28A:p.G10S&missense;NRXN1:NM_004801(22Exons):exon2:c.G28A:p.G10S&missense   | 0.0002575 | Y                 | B;C;D;F:0.0435:0.843:0.771     |
| 22  | 51113650 | A/G         | ID3913 | SHANK3 | missense | SHANK3:NM_033517(22Exons):exon2:c.A238G:p.N80D&missense                                                          | 0.0005149 | Y                 | A;D;F:0.039:0.846:0.75         |
| 22  | 51117284 | G/A         | ID3923 | SHANK3 | missense | SHANK3:NM_033517(22Exons):exon5:c.G536A:p.R179H&missense                                                         | 0.0002575 | Y                 | A;B;C;D;E;F:0.0484:0.828:0.792 |
| 22  | 51117307 | G/A         | ID3925 | SHANK3 | missense | SHANK3:NM_033517(22Exons):exon5:c.G559A:p.V187M&missense                                                         | 0.0002575 | Y                 | A;K;B;D;E;F:0.0349:0.874:0.696 |

**eTable 13 (continued). Information about variants identified in the reduced NMDA-mediated synaptic current in the follow-up study**

| CHR | POS      | REF/ALT | rsID       | Gene   | Variant  | RefGeneFeatures                                            | MAF_dis   | Causal_KGGSeq | Prediction_other                    |
|-----|----------|---------|------------|--------|----------|------------------------------------------------------------|-----------|---------------|-------------------------------------|
| 22  | 51133230 | C/T     | ID3943     | SHANK3 | missense | SHANK3:NM_033517(22Exons):exon10:c.C1058T:p.A353V&missense | 0.000266  | Y             | A;B;C;J;D;E;H;F;I:0.0247:0.949:0.88 |
| 22  | 51133347 | C/T     | ID3944     | SHANK3 | missense | SHANK3:NM_033517(22Exons):exon10:c.C1175T:p.S392L&missense | 0.0002658 | Y             | A;B;C;J;D;E;H;F;I:0.0247:0.949:0.88 |
| 22  | 51133409 | C/T     | ID3946     | SHANK3 | missense | SHANK3:NM_033517(22Exons):exon10:c.C1237T:p.R413W&missense | 0.0005322 | Y             | A;C;D:0.0555:0.805:0.804            |
| 22  | 51143179 | C/G     | ID3974     | SHANK3 | missense | SHANK3:NM_033517(22Exons):exon15:c.C1743G:p.I581M&missense | 0.0002575 | Y             | A;C;D;E;I:0.0455:0.835:0.771        |
| 22  | 51144506 | C/T     | ID3980     | SHANK3 | missense | SHANK3:NM_033517(22Exons):exon17:c.C1994T:p.P665L&missense | 0.0002575 | Y             | A;B;C;J;D;E;H;F;I:0.0247:0.949:0.88 |
| 22  | 51153371 | G/A     | rs61729471 | SHANK3 | missense | SHANK3:NM_033517(22Exons):exon19:c.G2119A:p.A707T&missense | 0.00103   | Y             | A;D;E;H;F:0.036:0.861:0.732         |
| 22  | 51153377 | G/C     | ID3993     | SHANK3 | missense | SHANK3:NM_033517(22Exons):exon19:c.G2125C:p.E709Q&missense | 0.0005149 | Y             | B;D;H;F;I:0.0292:0.883:0.683        |
| 22  | 51153389 | C/T     | ID3994     | SHANK3 | missense | SHANK3:NM_033517(22Exons):exon19:c.C2137T:p.R713W&missense | 0.0002575 | Y             | A;D;E;F:0.0413:0.843:0.755          |
| 22  | 51153390 | G/A     | ID3995     | SHANK3 | missense | SHANK3:NM_033517(22Exons):exon19:c.G2138A:p.R713Q&missense | 0.0002575 | Y             | A;D;E;F:0.0413:0.843:0.755          |

**eTable 13 (continued). Information about variants identified in the reduced NMDA-mediated synaptic current in the follow-up study**

| CHR | POS      | REF/<br>ALT | rsID   | Gene   | Variant  | RefGeneFeatures                                             | MAF_dis   | Causal<br>_KGGSeq | Prediction_other                     |
|-----|----------|-------------|--------|--------|----------|-------------------------------------------------------------|-----------|-------------------|--------------------------------------|
| 22  | 51153417 | G/A         | ID3996 | SHANK3 | missense | SHANK3:NM_033517(22Exons):exon19:c.G2165A:p.R722K&missense  | 0.0002575 | Y                 | A;G;J;D;F:0.0267:0.944:0.882         |
| 22  | 51153461 | C/G         | ID3997 | SHANK3 | missense | SHANK3:NM_033517(22Exons):exon19:c.C2209G:p.P737A&missense  | 0.0005149 | Y                 | G;B;J;F:0.0314:0.936:0.89            |
| 22  | 51158740 | C/T         | ID4006 | SHANK3 | missense | SHANK3:NM_033517(22Exons):exon21:c.C2437T:p.P813S&missense  | 0.0002575 | Y                 | A;B;C;D;E;H;F:0.0432:0.844:0.773     |
| 22  | 51158852 | G/C         | ID4008 | SHANK3 | missense | SHANK3:NM_033517(22Exons):exon21:c.G2549C:p.G850A&missense  | 0.0005155 | Y                 | B;D;H;F:0.0414:0.84:0.742            |
| 22  | 51158984 | C/T         | ID4014 | SHANK3 | missense | SHANK3:NM_033517(22Exons):exon21:c.C2681T:p.P894L&missense  | 0.0005152 | Y                 | G;B;E;F:0.0351:0.86:0.712            |
| 22  | 51159850 | A/G         | ID4024 | SHANK3 | missense | SHANK3:NM_033517(22Exons):exon21:c.A3547G:p.S1183G&missense | 0.0002575 | Y                 | A;G;B;C;J;D;E;H;F:0.0283:0.944:0.891 |
| 22  | 51159952 | C/T         | ID4025 | SHANK3 | missense | SHANK3:NM_033517(22Exons):exon21:c.C3649T:p.R1217C&missense | 0.0005149 | Y                 | A;B;D;F:0.0324:0.877:0.706           |
| 22  | 51160049 | C/T         | ID4031 | SHANK3 | missense | SHANK3:NM_033517(22Exons):exon21:c.C3746T:p.P1249L&missense | 0.00103   | Y                 | A;G;B;C;E;H:0.0558:0.807:0.789       |
| 22  | 51160268 | C/T         | ID4035 | SHANK3 | missense | SHANK3:NM_033517(22Exons):exon21:c.C3965T:p.P1322L&missense | 0.0005149 | Y                 | K;G;B;C;E;H;F;I:0.0421:0.84:0.768    |
| 22  | 51160786 | C/T         | ID4042 | SHANK3 | missense | SHANK3:NM_033517(22Exons):exon21:c.C4483T:p.R1495C&missense | 0.0002575 | Y                 | A;B;C;D;E;F:0.0484:0.828:0.792       |



**eTable 13 (continued). Information about variants identified in the reduced NMDA-mediated synaptic current in the follow-up study**

| CHR | POS      | REF/<br>ALT | rsID   | Gene   | Variant  | RefGeneFeatures                                             | MAF_dis   | Causal<br>_KGGSeq | Prediction_other                     |
|-----|----------|-------------|--------|--------|----------|-------------------------------------------------------------|-----------|-------------------|--------------------------------------|
| 22  | 51160801 | G/A         | ID4043 | SHANK3 | missense | SHANK3:NM_033517(22Exons):exon21:c.G4498A:p.E1500K&missense | 0.0002575 | Y                 | G;B;J;E;H;F;I:0.0355:0.933:0.895     |
| 22  | 51169682 | C/T         | ID4054 | SHANK3 | missense | SHANK3:NM_033517(22Exons):exon22:c.C5096T:p.T1699M&missense | 0.0002604 | Y                 | A;G;B;C;J;D;E;H;F:0.0283:0.944:0.891 |
| 6   | 1.23E+08 | A/T         | ID1492 | FABP7  | missense | FABP7:NM_001446(4Exons):exon1:c.A1T:p.M1L&missense          | 0.0002575 | Y                 | A;D;E;F:0.0413:0.843:0.755           |
| 6   | 1.23E+08 | G/C         | ID1498 | FABP7  | missense | FABP7:NM_001446(4Exons):exon2:c.G140C:p.G47A&missense       | 0.0002575 | Y                 | A;B;C;D;E;F:0.0484:0.828:0.792       |
| 6   | 1.23E+08 | T/A         | ID1499 | FABP7  | missense | FABP7:NM_001446(4Exons):exon2:c.T152A:p.V51D&missense       | 0.0002575 | Y                 | A;K;G;B;C;D;E;F:0.0405:0.851:0.764   |
| 6   | 1.23E+08 | A/T         | ID1500 | FABP7  | missense | FABP7:NM_001446(4Exons):exon2:c.A154T:p.I52F&missense       | 0.0002575 | Y                 | A;B;C;D;E;F:0.0484:0.828:0.792       |
| 6   | 1.23E+08 | A/G         | ID1501 | FABP7  | missense | FABP7:NM_001446(4Exons):exon2:c.A233G:p.D78G&missense       | 0.0002575 | Y                 | A;K;G;B;D;E;H;F:0.0345:0.869:0.722   |
| 6   | 1.23E+08 | G/A         | ID1502 | FABP7  | missense | FABP7:NM_001446(4Exons):exon3:c.G322A:p.E108K&missense      | 0.0002575 | Y                 | A;B;C;D;E;F:0.0484:0.828:0.792       |
| 6   | 1.23E+08 | C/T         | ID1504 | FABP7  | missense | FABP7:NM_001446(4Exons):exon4:c.C352T:p.L118F&missense      | 0.0002575 | Y                 | A;B;C;D;E;F:0.0484:0.828:0.792       |

**eTable 13 (continued). Information about variants identified in the reduced NMDA-mediated synaptic current in the follow-up study**

| CHR | POS      | REF/<br>ALT | rsID   | Gene  | Variant  | RefGeneFeatures                                           | MAF_dis   | Causal<br>_KGGSeq | Prediction_other               |
|-----|----------|-------------|--------|-------|----------|-----------------------------------------------------------|-----------|-------------------|--------------------------------|
| 8   | 95893921 | A/G         | ID1790 | CCNE2 | missense | CCNE2:NM_057749(12Exons):exon12:c.T1154C:p.V385A&missense | 0.0002575 | Y                 | B;C;E;H;I:0.0521:0.802:0.786   |
| 8   | 95895020 | T/C         | ID1797 | CCNE2 | missense | CCNE2:NM_057749(12Exons):exon10:c.A932G:p.K311R&missense  | 0.0002575 | Y                 | C;E;F:0.0424:0.828:0.781       |
| 8   | 95897302 | A/G         | ID1802 | CCNE2 | missense | CCNE2:NM_057749(12Exons):exon9:c.T824C:p.I275T&missense   | 0.0002575 | Y                 | A;B;C;D;E;F:0.0484:0.828:0.792 |
| 8   | 95897368 | A/G         | ID1803 | CCNE2 | missense | CCNE2:NM_057749(12Exons):exon9:c.T758C:p.V253A&missense   | 0.0002575 | Y                 | A;B;C;D;E;F:0.0484:0.828:0.792 |
| 8   | 95897785 | T/G         | ID1807 | CCNE2 | missense | CCNE2:NM_057749(12Exons):exon8:c.A602C:p.E201A&missense   | 0.0005149 | Y                 | A;B;C;D;E;F:0.0484:0.828:0.792 |
| 8   | 95905121 | G/A         | ID1813 | CCNE2 | missense | CCNE2:NM_057749(12Exons):exon5:c.C242T:p.T81I&missense    | 0.0002575 | Y                 | A;B;C;D;E;F:0.0484:0.828:0.792 |
| 8   | 95906334 | C/T         | ID1816 | CCNE2 | missense | CCNE2:NM_057749(12Exons):exon3:c.G28A:p.A10T&missense     | 0.0002575 | Y                 | G;B;C;D;E;F:0.0447:0.839:0.772 |
| 8   | 95906449 | T/C         | ID1819 | CCNE2 | missense | CCNE2:NM_057749(12Exons):exon2:c.A1G:p.M1V&missense       | 0.0002575 | Y                 | A;D;E;F:0.0413:0.843:0.755     |

**eTable 13 (continued). Information about variants identified in the reduced NMDA-mediated synaptic current in the follow-up study**

| CHR | POS     | REF/ALT | rsID   | Gene  | Variant  | RefGeneFeatures                                                                                                                                                                                                                                                                               | MAF_dis   | Causal_KGGSeq | Prediction_other               |
|-----|---------|---------|--------|-------|----------|-----------------------------------------------------------------------------------------------------------------------------------------------------------------------------------------------------------------------------------------------------------------------------------------------|-----------|---------------|--------------------------------|
| 9   | 1.4E+08 | T/C     | ID2142 | GRIN1 | missense | GRIN1:NM_021569(19Exons):exon1:c.T86C:p.I29T&missense;GRIN1:NM_007327(20Exons):exon1:c.T86C:p.I29T&missense;GRIN1:NM_001185090(21Exons):exon1:c.T86C:p.I29T&missense;GRIN1:NM_001185091(20Exons):exon1:c.T86C:p.I29T&missense;GRIN1:NM_000832(19Exons):exon1:c.T86C:p.I29T&missense           | 0.0002575 | Y             | A;B;C;D;H;F:0.0455:0.832:0.786 |
| 9   | 1.4E+08 | G/A     | ID2145 | GRIN1 | missense | GRIN1:NM_021569(19Exons):exon2:c.G371A:p.R124H&missense;GRIN1:NM_007327(20Exons):exon2:c.G371A:p.R124H&missense;GRIN1:NM_001185090(21Exons):exon2:c.G371A:p.R124H&missense;GRIN1:NM_001185091(20Exons):exon2:c.G371A:p.R124H&missense;GRIN1:NM_000832(19Exons):exon2:c.G371A:p.R124H&missense | 0.0002575 | Y             | A;B;C;D;E;F:0.0484:0.828:0.792 |

**eTable 13 (continued). Information about variants identified in the reduced NMDA-mediated synaptic current in the follow-up study**

| CHR | POS     | REF/<br>ALT | rsID   | Gene  | Variant  | RefGeneFeatures                                                                                                                                                                                                                                                                                    | MAF_dis   | Causal<br>_KGGSeq | Prediction_other                   |
|-----|---------|-------------|--------|-------|----------|----------------------------------------------------------------------------------------------------------------------------------------------------------------------------------------------------------------------------------------------------------------------------------------------------|-----------|-------------------|------------------------------------|
| 9   | 1.4E+08 | C/G         | ID2160 | GRIN1 | missense | GRIN1:NM_021569(19Exons):exon5:c.C701G:p.A234G&missense;GRIN1:NM_007327(20Exons):exon5:c.C701G:p.A234G&missense;GRIN1:NM_001185090(21Exons):exon6:c.C764G:p.A255G&missense;GRIN1:NM_001185091(20Exons):exon6:c.C764G:p.A255G&missense;GRIN1:NM_000832(19Exons):exon5:c.C701G:p.A234G&missense      | 0.0002575 | Y                 | A;K;G;B;C;D;E;F:0.0405:0.851:0.764 |
| 9   | 1.4E+08 | C/T         | ID2169 | GRIN1 | missense | GRIN1:NM_021569(19Exons):exon7:c.C1109T:p.T370I&missense;GRIN1:NM_007327(20Exons):exon7:c.C1109T:p.T370I&missense;GRIN1:NM_001185090(21Exons):exon8:c.C1172T:p.T391I&missense;GRIN1:NM_001185091(20Exons):exon8:c.C1172T:p.T391I&missense;GRIN1:NM_000832(19Exons):exon7:c.C1109T:p.T370I&missense | 0.0002603 | Y                 | A;B;E;F:0.0391:0.836:0.739         |

**eTable 13 (continued). Information about variants identified in the reduced NMDA-mediated synaptic current in the follow-up study**

| CHR | POS      | REF/ALT | rsID   | Gene  | Variant  | RefGeneFeatures                                                                                                                                                                                                                                                                                         | MAF_dis   | Causal_KGGSeq | Prediction_other                     |
|-----|----------|---------|--------|-------|----------|---------------------------------------------------------------------------------------------------------------------------------------------------------------------------------------------------------------------------------------------------------------------------------------------------------|-----------|---------------|--------------------------------------|
| 9   | 1.4E+08  | G/C     | ID2197 | GRIN1 | missense | GRIN1:NM_021569(19Exons):exon13:c.G1780C:p.E594Q&missense;GRIN1:NM_007327(20Exons):exon13:c.G1780C:p.E594Q&missense;GRIN1:NM_001185090(21Exons):exon14:c.G1843C:p.E615Q&missense;GRIN1:NM_001185091(20Exons):exon14:c.G1843C:p.E615Q&missense;GRIN1:NM_000832(19Exons):exon13:c.G1780C:p.E594Q&missense | 0.0002687 | Y             | A;G;B;J;D;F:0.0327:0.938:0.896       |
| 9   | 1.4E+08  | T/C     | ID2213 | GRIN1 | missense | LRRC26:NM_001013653(2Exons):downstream+966;GRIN1:NM_021569(19Exons):3UTR+266;GRIN1:NM_007327(20Exons):3UTR+266;GRIN1:NM_001185090(21Exons):exon21:c.T2783C:p.I928T&missense;GRIN1:NM_001185091(20Exons):exon20:c.T2672C:p.I891T&missense;GRIN1:NM_000832(19Exons):exon19:c.T2609C:p.I870T&missense      | 0.0005149 | Y             | A;D;F:0.039:0.846:0.75               |
| 9   | 90114017 | G/A     | ID1937 | DAPK1 | missense | DAPK1:NM_004938(26Exons):exon2:c.G25A:p.V9M&missense                                                                                                                                                                                                                                                    | 0.0002575 | Y             | G;B;C;D;E;H:0.0506:0.825:0.773       |
| 9   | 90219880 | C/T     | ID1938 | DAPK1 | missense | DAPK1:NM_004938(26Exons):exon3:c.C74T:p.A25V&missense                                                                                                                                                                                                                                                   | 0.0002575 | Y             | A;G;B;C;J;D;E;H;F:0.0283:0.944:0.891 |

**eTable 13 (continued). Information about variants identified in the reduced NMDA-mediated synaptic current in the follow-up study**

| CHR | POS      | REF/<br>ALT | rsID        | Gene  | Variant  | RefGeneFeatures                                           | MAF_dis   | Causal<br>_KGGSeq | Prediction_other                  |
|-----|----------|-------------|-------------|-------|----------|-----------------------------------------------------------|-----------|-------------------|-----------------------------------|
| 9   | 90220066 | C/T         | ID1940      | DAPK1 | missense | DAPK1:NM_004938(26Exons):exon3:c.C260T:p.T87M&missense    | 0.0005149 | Y                 | A;B;C;E;H;F;I:0.0412:0.846:0.768  |
| 9   | 90254375 | T/C         | ID1951      | DAPK1 | missense | DAPK1:NM_004938(26Exons):exon5:c.T530C:p.I177T&missense   | 0.0002577 | Y                 | A;G;B;J;D;E;F;I:0.0268:0.946:0.88 |
| 9   | 90255314 | C/T         | ID1957      | DAPK1 | missense | DAPK1:NM_004938(26Exons):exon8:c.C731T:p.T244I&missense   | 0.0002575 | Y                 | A;G;J;D;F:0.0267:0.944:0.882      |
| 9   | 90256957 | C/T         | ID1962      | DAPK1 | missense | DAPK1:NM_004938(26Exons):exon10:c.C90T:p.A301V&missense   | 0.0002575 | Y                 | A;B;C;D;E;F:0.0484:0.828:0.792    |
| 9   | 90258343 | C/A         | ID1970      | DAPK1 | missense | DAPK1:NM_004938(26Exons):exon11:c.C971A:p.S324Y&missense  | 0.0002575 | Y                 | A;B;C;D;E;F:0.0484:0.828:0.792    |
| 9   | 90258376 | A/T         | ID1971      | DAPK1 | missense | DAPK1:NM_004938(26Exons):exon11:c.A1004T:p.D335V&missense | 0.0005155 | Y                 | A;B;C;D;E;F:0.0484:0.828:0.792    |
| 9   | 90258378 | A/G         | ID1972      | DAPK1 | missense | DAPK1:NM_004938(26Exons):exon11:c.A1006G:p.T336A&missense | 0.0002575 | Y                 | A;B;C;D;E;F:0.0484:0.828:0.792    |
| 9   | 90262235 | G/A         | rs12343465  | DAPK1 | missense | DAPK1:NM_004938(26Exons):exon14:c.G1246A:p.V416I&missense | 0.0002576 | Y                 | B;D;E;F:0.0342:0.872:0.702        |
| 9   | 90264892 | A/C         | ID1996      | DAPK1 | missense | DAPK1:NM_004938(26Exons):exon16:c.A1485C:p.K495N&missense | 0.0005149 | Y                 | K;B;D;E;H;F:0.0346:0.865:0.698    |
| 9   | 90264917 | G/A         | rs372895478 | DAPK1 | missense | DAPK1:NM_004938(26Exons):exon16:c.G1510A:p.V504M&missense | 0.0002575 | Y                 | A;B;C;D;E;F:0.0484:0.828:0.792    |

**eTable 13 (continued). Information about variants identified in the reduced NMDA-mediated synaptic current in the follow-up study**

| CHR | POS      | REF/<br>ALT | rsID        | Gene  | Variant  | RefGeneFeatures                                            | MAF_dis   | Causal<br>_KGGSeq | Prediction_other                         |
|-----|----------|-------------|-------------|-------|----------|------------------------------------------------------------|-----------|-------------------|------------------------------------------|
| 9   | 90266442 | G/A         | ID1999      | DAPK1 | missense | DAPK1:NM_004938(26Exons):exon17:c.G1627A:p.D543N&missense  | 0.0005149 | Y                 | G;LRT_score;B;C;H;F;I:0.0389:0.853:0.749 |
| 9   | 90266526 | G/A         | rs199940257 | DAPK1 | missense | DAPK1:NM_004938(26Exons):exon17:c.G1711A:p.D571N&missense  | 0.002832  | Y                 | A;D;E;F:0.0413:0.843:0.755               |
| 9   | 90266544 | G/A         | rs369647209 | DAPK1 | missense | DAPK1:NM_004938(26Exons):exon17:c.G1729A:p.G577S&missense  | 0.0002575 | Y                 | A;B;C;D;E;F:0.0484:0.828:0.792           |
| 9   | 90266619 | A/G         | ID2002      | DAPK1 | missense | DAPK1:NM_004938(26Exons):exon17:c.A1804G:p.N602D&missense  | 0.0002575 | Y                 | A;K;E;H;F:0.0343:0.866:0.704             |
| 9   | 90272992 | G/A         | rs117269616 | DAPK1 | missense | DAPK1:NM_004938(26Exons):exon18:c.G1873A:p.V625M&missense  | 0.00309   | Y                 | A;B;C;D;E;F:0.0484:0.828:0.792           |
| 9   | 90296353 | G/A         | ID2011      | DAPK1 | missense | DAPK1:NM_004938(26Exons):exon20:c.G2036A:p.R679Q&missense  | 0.0005149 | Y                 | A;B;C;D;E;F:0.0484:0.828:0.792           |
| 9   | 90296355 | C/T         | ID2012      | DAPK1 | missense | DAPK1:NM_004938(26Exons):exon20:c.C2038T:p.P680S&missense  | 0.0002575 | Y                 | A;B;C;D;E;F:0.0484:0.828:0.792           |
| 9   | 90311939 | G/A         | ID2020      | DAPK1 | missense | DAPK1:NM_004938(26Exons):exon22:c.G2431A:p.V811M&missense  | 0.0002575 | Y                 | A;B;C;D;E;F:0.0484:0.828:0.792           |
| 9   | 90317947 | T/G         | ID2028      | DAPK1 | missense | DAPK1:NM_004938(26Exons):exon25:c.T2875G:p.C959G&missense  | 0.0002575 | Y                 | A;B;C;D;E;H;F:0.0432:0.844:0.773         |
| 9   | 90321218 | G/A         | ID2035      | DAPK1 | missense | DAPK1:NM_004938(26Exons):exon26:c.G3232A:p.V1078M&missense | 0.0002575 | Y                 | A;B;C;D;E;H;F:0.0432:0.844:0.773         |

**eTable 13 (continued). Information about variants identified in the reduced NMDA-mediated synaptic current in the follow-up study**

| CHR | POS      | REF/<br>ALT | rsID        | Gene  | Variant  | RefGeneFeatures                                            | MAF_dis   | Causal<br>_KGGSeq | Prediction_other                 |
|-----|----------|-------------|-------------|-------|----------|------------------------------------------------------------|-----------|-------------------|----------------------------------|
| 9   | 90321249 | T/C         | ID2036      | DAPK1 | missense | DAPK1:NM_004938(26Exons):exon26:c.T3263C:p.M1088T&missense | 0.0002575 | Y                 | A;B;C;D;E;F:0.0484:0.828:0.792   |
| 9   | 90321263 | C/T         | ID2037      | DAPK1 | missense | DAPK1:NM_004938(26Exons):exon26:c.C3277T:p.R1093W&missense | 0.0002575 | Y                 | A;B;C;D;E;F:0.0484:0.828:0.792   |
| 9   | 90321357 | T/C         | ID2042      | DAPK1 | missense | DAPK1:NM_004938(26Exons):exon26:c.T3371C:p.M1124T&missense | 0.0005149 | Y                 | A;B;E;H;F;I:0.0287:0.885:0.676   |
| 9   | 90321480 | C/T         | rs201991862 | DAPK1 | missense | DAPK1:NM_004938(26Exons):exon26:c.C3494T:p.A1165V&missense | 0.0002575 | Y                 | A;B;C;D;E;H;F:0.0432:0.844:0.773 |
| 9   | 90321510 | A/G         | ID2045      | DAPK1 | missense | DAPK1:NM_004938(26Exons):exon26:c.A3524G:p.K1175R&missense | 0.0005149 | Y                 | A;B;E;F:0.0391:0.836:0.739       |
| 9   | 90321582 | G/A         | ID2047      | DAPK1 | missense | DAPK1:NM_004938(26Exons):exon26:c.G3596A:p.R1199H&missense | 0.0002575 | Y                 | A;B;C;D;E;F:0.0484:0.828:0.792   |
| 9   | 90321802 | G/T         | rs56169226  | DAPK1 | missense | DAPK1:NM_004938(26Exons):exon26:c.G3816T:p.M1272I&missense | 0.0002576 | Y                 | A;B;C;D;E;F:0.0484:0.828:0.792   |
| 9   | 90321833 | A/G         | ID2050      | DAPK1 | missense | DAPK1:NM_004938(26Exons):exon26:c.A3847G:p.M1283V&missense | 0.0002575 | Y                 | B;J;E;H:0.0301:0.93:0.886        |
| 9   | 90322005 | T/G         | ID2051      | DAPK1 | missense | DAPK1:NM_004938(26Exons):exon26:c.T4019G:p.V1340G&missense | 0.0002575 | Y                 | A;B;C;D;E;H;F:0.0432:0.844:0.773 |
| 9   | 90322028 | G/A         | ID2052      | DAPK1 | missense | DAPK1:NM_004938(26Exons):exon26:c.G4042A:p.G1348R&missense | 0.0002575 | Y                 | A;G;D;E;F:0.04:0.856:0.738       |
| 9   | 90322121 | A/G         | ID2054      | DAPK1 | missense | DAPK1:NM_004938(26Exons):exon26:c.A4135G:p.K1379E&missense | 0.0002575 | Y                 | A;B;C;D;E;F:0.0484:0.828:0.792   |



**eTable 13 (continued). Information about variants identified in the reduced NMDA-mediated synaptic current in the follow-up study**

| CHR | POS      | REF/<br>ALT | rsID   | Gene  | Variant  | RefGeneFeatures                                            | MAF_dis   | Causal<br>_KGGSeq | Prediction_other           |
|-----|----------|-------------|--------|-------|----------|------------------------------------------------------------|-----------|-------------------|----------------------------|
| 9   | 90322220 | G/T         | ID2056 | DAPK1 | missense | DAPK1:NM_004938(26Exons):exon26:c.G4234T:p.A1412S&missense | 0.0002575 | Y                 | A;D;E;F:0.0413:0.843:0.755 |

**eTable 14. Set-based association results on the 3 candidate gene-sets in the follow-up study on rare (MAF<0.01) synonymous variants in CMC burden test**

| Gene Set                                 | NumVar | NumPolyVar | NonRefSite | Pvalue   |
|------------------------------------------|--------|------------|------------|----------|
| abnormal AMPA-mediated synaptic currents | 138    | 138        | 273        | 0.44231  |
| reduced AMPA-mediated synaptic currents  | 263    | 251        | 561        | 0.71572  |
| reduced NMDA-mediated synaptic currents  | 271    | 271        | 502        | 0.992278 |

**eTable 15. Burden of rare allele (damaging nonsyn with MAF < 0.01) in follow-up by median splitting, with subjects with lower PANSS were treated as "less responder".**

| Gene Set                                 | # var | Allele count<br>(Nonresponder/Responder) |
|------------------------------------------|-------|------------------------------------------|
| Reduced NMDA-mediated synaptic currents  | 261   | 260/225                                  |
| Reduced AMPA-mediated synaptic currents  | 231   | 199/181                                  |
| Abnormal AMPA-mediated synaptic currents | 78    | 61/50                                    |
